# Supplementary material for: Tailoring exciplex formation in metal-induced supramolecular organization
Source: Royal Society of Chemistry journal article supplement (doi:10.1039/d6dt00490c), 2026-04-06
Supplement: d6dt00490c1.pdf [file d6dt00490c1.pdf]

## Tailoring Exciplex Formation in Metal-Induced Supramolecular Organization

Giau Le-Hoang,<sup>\*a</sup> Laure Guénée,<sup>b</sup> and Claude Piguet<sup>\*a</sup>

<sup>a</sup> *Department of Inorganic and Analytical Chemistry, University of Geneva, 30 quai E. Ansermet, CH-1211 Geneva 4, Switzerland.*

*Emails: [Hoang.Le@unige.ch](mailto:Hoang.Le@unige.ch), [Claude.Piguet@unige.ch](mailto:Claude.Piguet@unige.ch)*

<sup>b</sup> *Laboratory of Crystallography, University of Geneva, 24 quai E. Ansermet, CH-1211 Geneva 4, Switzerland.*

### Supporting Information

(62 pages)

## Appendix 1: Experimental Section

**General.** All reagents were purchased from Alfa Aesar, FluroChem, Acros, and Sigma-Aldrich, and used as received. Compounds **L0**,<sup>A1-1</sup> [**L0Y**(hfac)<sub>3</sub>],<sup>A1-1</sup> [**L0Eu**(hfac)<sub>3</sub>],<sup>A1-1</sup> **1**,<sup>A1-2</sup> **2**,<sup>A1-3</sup> **4**,<sup>A1-4</sup> [**digEu**(hfac)<sub>3</sub>],<sup>A1-5</sup> and [**digY**(hfac)<sub>3</sub>]<sup>A1-6</sup> were prepared according to literature. Dichloromethane was distilled over calcium hydride.

### Spectroscopic and analytical measurements

<sup>1</sup>H and <sup>13</sup>C NMR spectra were recorded at 298 K on a Bruker Avance 400 MHz spectrometer equipped with BCU temperature control for variable temperature measurements. Electrospray (ESI-MS) mass spectra were recorded on an Applied Biosystems API 150EX LC/MS System equipped with a Turbo Ionspray source. Elemental analyses were performed by K. L. Paglia from the Microchemical Laboratory of the University of Geneva. Electronic spectra in the UV-Vis region were recorded at 293 K from solutions in CH<sub>2</sub>Cl<sub>2</sub> with a Perkin-Elmer Lambda 1050. The emission spectra were recorded using a Fluorolog (Horiba Jobin-Yvon) instrument equipped with an iHR320 imaging spectrometer, a 450 W xenon lamp illuminator (FL-1039A/40A) and a Peltier-cooled photomultiplier tube (PMT Hamamatsu R928P). The emission spectra were corrected for the wavelength-dependent sensitivity of the PMT. The standard xenon lamp of the Horiba Scientific Fluorolog 3 spectrofluorometer has been used for UV excitation of the samples to record the pertinent emission spectra, where the appropriate longpass filters (Thorlabs) have been placed after the sample to remove the second-order Rayleigh scattering of the xenon lamp. The emission spectra were corrected for the instrumental response function. The mathematical analyses were performed by using Origin 2017 (OriginLab Corporation) and Excel<sup>®</sup> (Microsoft) software.

## Synthesis of target ligands L1 and L2.

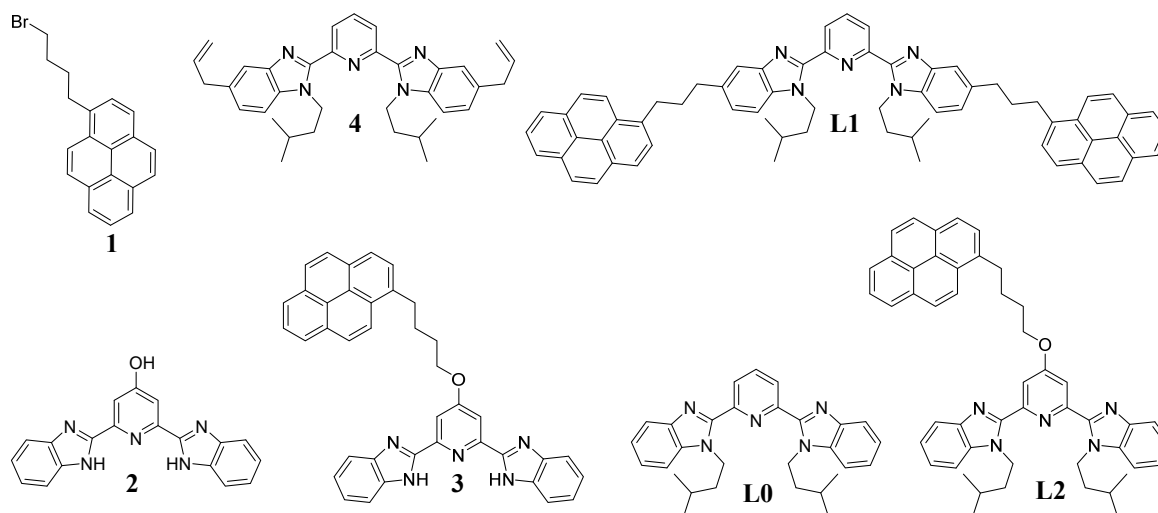

**Figure A1-1.** Chemical structures of synthesized compounds in this work.

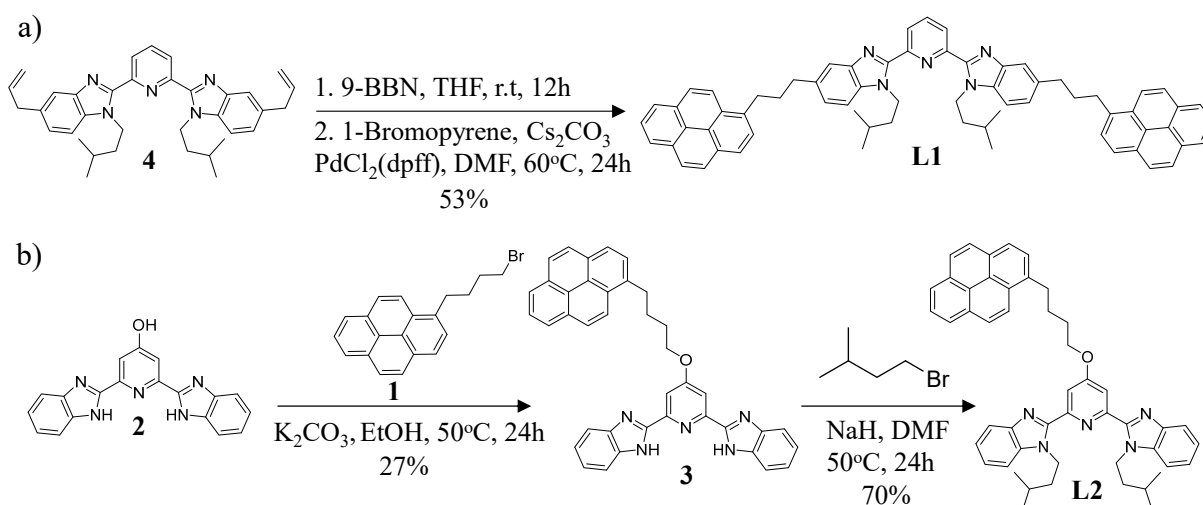

**Scheme A1-1.** Synthesis of the tridentate ligands **L1** and **L2**.

**Preparation of L1.** To a solution of **4** (2.5 g, 4.7 mmol) in dry THF (25 mL), 9-borabicyclo[3.3.1]nonane (9-BBN, 0.5 M, 48 mL, 24 mmol) was added at 0°C. The solution was stirred at r.t for 12h. 1-Bromopyrene (13 g, 46.2 mmol), Cs<sub>2</sub>CO<sub>3</sub> (7.8 g, 24 mmol), Pd<sub>2</sub>Cl<sub>2</sub>(dppf) (0.7 g, 0.96 mmol; dppf = (ferrocene-1,1'-diyl)bis(diphenylphosphane)), and DMF (25 mL) were

added. The mixture was stirred at 60°C for 24h and then cooled to room temperature. H<sub>4</sub>EDTA (15 g, 51.3 mmol) and H<sub>2</sub>O (30 mL) were added. The mixture was stirred at r.t for 1h. The mixture was extracted with CH<sub>2</sub>Cl<sub>2</sub> (3 x 100 mL), dried over Na<sub>2</sub>SO<sub>4</sub> and evaporated to dryness. The residue was purified by column chromatography (SiO<sub>2</sub>, CH<sub>2</sub>Cl<sub>2</sub>/MeOH 100/0 to 100/10) to afford **L1** (2.35 g, 53%) as a white solid. <sup>1</sup>H NMR (400 MHz, CD<sub>2</sub>Cl<sub>2</sub>): 8.31 (d, *J* = 6.4 Hz, 2H), 8.29 (d, *J* = 7.7 Hz, 2H), 8.25 – 8.18 (m, 4H), 8.18 (d, *J* = 7.8 Hz, 2H), 8.14 (d, *J* = 9.3 Hz, 2H), 8.11 – 8.02 (m, 7H), 7.97 (d, *J* = 7.8 Hz, 2H), 7.72 (d, *J* = 0.9 Hz, 2H), 7.48 – 7.43 (m, 2H), 7.29 (dd, *J* = 8.4, 1.6 Hz, 2H), 4.82 – 4.73 (m, 4H), 3.52 – 3.43 (m, 4H), 3.02 (t, *J* = 7.6 Hz, 4H), 2.39 – 2.27 (m, 4H), 1.71 – 1.62 (m, 4H), 1.51 – 1.41 (m, 2H), 0.73 (d, *J* = 6.6 Hz, 12H). <sup>13</sup>C NMR (101 MHz, CD<sub>2</sub>Cl<sub>2</sub>): 150.2, 143.3, 137.9, 137.1, 136.7, 134.8, 131.4, 130.9, 129.7, 128.6, 127.5, 127.3, 127.0, 126.4, 125.8, 125.1, 125.0, 124.9, 124.8, 124.7(6), 124.6, 124.3, 123.5, 119.4, 110.0, 43.5, 38.8, 36.0, 34.0, 33.0, 25.8, 21.9. ESI-MS calculated for [C<sub>67</sub>H<sub>61</sub>N<sub>5</sub> + H]<sup>+</sup> ([**L1** + H]<sup>+</sup>): *m/z* 936.5; found: 937.1. Elemental analysis calculated for C<sub>67</sub>H<sub>61</sub>N<sub>5</sub> (**L1**) (%): C 85.95, H 6.57, N 7.48; found (%): C 85.31, H 6.49, N 7.35.

**Preparation of 3.** A mixture of **2** (1.0 g, 3.05 mmol) and K<sub>2</sub>CO<sub>3</sub> (0.42 g, 3.04 mmol) in EtOH (50 mL) was stirred at 80°C for 1h. **1** (1.55 g, 4.60 mmol) and KI (catalytic amount) were added. The solution was heated at 80°C for 24h and then evaporated to dryness. H<sub>2</sub>O (100 mL) was added. The resulting solid was filtered off and purified by column chromatography (SiO<sub>2</sub>, CH<sub>2</sub>Cl<sub>2</sub>/MeOH 100/0 to 100/5) to afford **3** (0.48 g, 27%) as a white solid. <sup>1</sup>H NMR (400 MHz, DMSO-*d*<sub>6</sub>): 12.94 (s, 2H), 8.42 (d, *J* = 9.3 Hz, 1H), 8.29 – 8.19 (m, 4H), 8.15 – 7.99 (m, 4H), 7.83 (s, 2H), 7.78 (d, *J* = 8.0 Hz, 2H), 7.73 (d, *J* = 7.9 Hz, 2H), 7.39 – 7.33 (m, 2H), 7.32 – 7.25 (m, 2H), 4.40 (d, *J* = 6.1 Hz, 2H), 3.45 (t, *J* = 7.1 Hz, 2H), 2.08 – 1.91 (m, 4H). <sup>13</sup>C NMR (101 MHz, DMSO-*d*<sub>6</sub>): 169.9, 153.7, 152.7, 147.4, 140.0, 137.6, 134.2, 133.7, 132.6, 131.4, 130.8, 130.7, 130.5, 129.8, 129.4,

128.3, 128.2, 128.0, 127.6, 127.5, 127.0, 126.8, 125.5, 123.0, 115.1, 110.7, 71.6, 58.2, 35.4, 31.6, 30.9.

**Preparation of L2.** A mixture of **2** (0.34 g, 0.63 mmol) and 60% NaH (0.08 g, 2 mmol) in dry DMF (5 mL) was stirred at r.t for 30 min. 1-Bromo-3-methylbutane (1.8 g, 1.19 mmol) and KI (catalytic amount) were added. The solution was heated at 50 °C for 24h and then quenched with water (10 mL). The mixture was extracted with CH<sub>2</sub>Cl<sub>2</sub> (3 x 20 mL), dried over Na<sub>2</sub>SO<sub>4</sub> and evaporated to dryness. The residue was purified by column chromatography (SiO<sub>2</sub>, CH<sub>2</sub>Cl<sub>2</sub>/MeOH 100/0 to 100/10) to afford **L2** (0.3 g, 70%) as a white solid. <sup>1</sup>H NMR (400 MHz, CD<sub>2</sub>Cl<sub>2</sub>): 8.39 (d, *J* = 9.2 Hz, 1H), 8.24 – 8.18 (m, 4H), 8.11 – 8.02 (m, 3H), 8.00 (d, *J* = 7.8 Hz, 1H), 7.87 (s, 2H), 7.84 – 7.80 (m, 2H), 7.53 – 7.49 (m, 2H), 7.41 – 7.31 (m, 4H), 4.82 – 4.74 (m, 4H), 4.38 (t, *J* = 5.8 Hz, 2H), 3.52 (t, *J* = 7.3 Hz, 2H), 2.20 – 2.09 (m, 4H), 1.68 – 1.61 (m, 4H), 1.49 – 1.40 (m, 2H), 0.73 (d, *J* = 6.6 Hz, 12H). <sup>13</sup>C NMR (101 MHz, CD<sub>2</sub>Cl<sub>2</sub>): 166.5, 151.7, 150.3, 142.9, 136.6, 136.4, 131.4, 130.9, 129.8, 128.6, 127.5, 127.3, 127.2, 126.5, 125.8, 125.0, 124.9, 124.8(4), 124.8(2), 124.7, 123.4, 123.1, 122.3, 120.0, 111.8, 110.3, 68.6, 43.4, 38.7, 33.0, 28.9, 28.1, 25.8, 21.9. ESI-MS calculated for [C<sub>49</sub>H<sub>49</sub>N<sub>5</sub>O + H]<sup>+</sup> (**L2** + H)<sup>+</sup>: *m/z* 724.4; found: 724.9. Elemental analysis calculated for C<sub>49</sub>H<sub>49</sub>N<sub>5</sub>O (**L2**) (%): C 81.29, H 6.82, N 9.67; found (%): C 81.25, H 7.02, N 9.71.

#### **General procedure for synthesis of [LkLn(hfac)<sub>3</sub>] (Lk = L1, L2 and Ln = Eu, Y) complexes**

A mixture of ligand **Lk** and [**dig**Ln(hfac)<sub>3</sub>] (1.1 eq.) in CH<sub>2</sub>Cl<sub>2</sub> was stirred at r.t for 30 min and then evaporated to dryness. The residue was purified by precipitation in pentane to afford [**Lk**Ln(hfac)<sub>3</sub>].

**[L1Eu(hfac)<sub>3</sub>].** Yield: 93%. <sup>1</sup>H NMR (400 MHz, CD<sub>2</sub>Cl<sub>2</sub>): 21.32 (br, 2H), 9.64 (d, *J* = 8.5 Hz, 2H), 9.07 (d, *J* = 9.3 Hz, 2H), 8.59 (dd, *J* = 16.3, 8.2 Hz, 4H), 8.42 (d, *J* = 7.8 Hz, 2H), 8.33 (d, *J* = 9.2 Hz, 2H), 8.27 – 8.22 (m, 4H), 8.20 (d, *J* = 8.9 Hz, 2H), 8.13 (d, *J* = 8.9 Hz, 2H), 8.05 (t, *J* = 7.6 Hz, 2H), 7.51 (t, *J* = 7.8 Hz, 1H), 6.83 (d, *J* = 7.9 Hz, 2H), 5.93 – 5.79 (m, 4H), 5.68 – 5.49 (m,

4H), 4.71 – 4.58 (m, 4H), 4.09 – 3.95 (m, 4H), 3.07 – 2.94 (m, 4H), 2.47 – 2.35 (m, 2H), 1.40 (d,  $J = 6.6$  Hz, 12H).  $^{13}\text{C}$  NMR (101 MHz,  $\text{CD}_2\text{Cl}_2$ ): 154.7, 154.0, 146.2, 145.8, 144.2, 137.9, 131.5, 131.2, 130.0, 129.2, 128.9, 127.9, 127.6, 127.2, 126.5, 125.8, 125.3, 125.1, 124.7, 124.6, 124.1, 115.4, 110.9, 99.7, 60.2, 56.1, 44.4, 40.9, 38.9, 36.2, 34.6, 26.8, 22.4. ESI-MS calculated for  $[\text{C}_{82}\text{H}_{64}\text{N}_5\text{O}_6\text{F}_{18}\text{Eu} - \text{hfac}]^+$  ( $[[\text{L1Eu}(\text{hfac})_3] - \text{hfac}]^+$ ):  $m/z$  1502.4; found: 1502.0. Elemental analysis calculated for  $\text{C}_{82}\text{H}_{64}\text{N}_5\text{O}_6\text{F}_{18}\text{Eu} ([\text{L1Eu}(\text{hfac})_3])$  (%): C 57.62, H 3.77, N 4.10; found (%): C 57.42, H 3.77, N 4.12.

**[L1Y(hfac)<sub>3</sub>]**. Yield: 84%.  $^1\text{H}$  NMR (400 MHz,  $\text{CD}_2\text{Cl}_2$ ): 8.36 (d,  $J = 8.0$  Hz, 1H), 8.32 (d,  $J = 9.1$  Hz, 2H), 8.21 (dd,  $J = 7.6, 4.2$  Hz, 4H), 8.18 (d,  $J = 7.8$  Hz, 2H), 8.14 (d,  $J = 9.2$  Hz, 2H), 8.11 – 8.01 (m, 10H), 7.96 (d,  $J = 7.8$  Hz, 2H), 7.45 (d,  $J = 8.5$  Hz, 2H), 7.36 (dd,  $J = 8.6, 1.5$  Hz, 2H), 5.92 (s, 3H), 4.62 – 4.52 (m, 4H), 3.49 – 3.41 (m, 4H), 2.98 (t,  $J = 7.9$  Hz, 4H), 2.28 – 2.18 (m, 4H), 2.03 – 1.94 (m, 4H), 1.94 – 1.86 (m, 2H), 1.13 (d,  $J = 6.4$  Hz, 12H).  $^{13}\text{C}$  NMR (101 MHz,  $\text{CD}_2\text{Cl}_2$ ): 175.8, 175.5, 175.2, 174.8, 148.7, 147.5, 140.6, 140.2, 138.8, 137.1, 134.3, 131.4, 131.0, 129.7, 128.6, 127.5, 127.3, 127.0, 126.4, 126.1, 125.7, 125.0, 124.9, 124.8, 124.7, 124.6, 123.5, 122.6, 122.1, 121.4, 119.2, 116.3, 113.5, 109.6, 89.6, 44.7, 38.3, 36.2, 34.0, 33.4, 26.4, 22.1. ESI-MS calculated for  $[\text{C}_{82}\text{H}_{64}\text{F}_{18}\text{N}_5\text{O}_6\text{Y} - \text{hfac}]^+$  ( $[[\text{L1Y}(\text{hfac})_3] - \text{hfac}]^+$ ):  $m/z$  1438.4; found: 1438.6. Elemental analysis calculated for  $\text{C}_{82}\text{H}_{64}\text{F}_{18}\text{N}_5\text{O}_6\text{Y} \cdot 0.4\text{CH}_2\text{Cl}_2 ([\text{L1Y}(\text{hfac})_3] \cdot 0.4\text{CH}_2\text{Cl}_2)$  (%): C 58.90, H 3.89, N 4.17; found (%): C 58.75, H 3.63, N 4.19.

**[L2Eu(hfac)<sub>3</sub>]**. Yield: 85%.  $^1\text{H}$  NMR (400 MHz,  $\text{CD}_2\text{Cl}_2$ ): 22.08 (br, 2H), 11.16 (br, 2H), 10.03 – 9.95 (m, 2H), 8.85 (dd,  $J = 8.4, 0.9$  Hz, 2H), 8.17 (dd,  $J = 7.2, 1.5$  Hz, 1H), 8.11 (d,  $J = 9.2$  Hz, 1H), 8.08 – 8.00 (m, 2H), 7.93 (d,  $J = 9.2$  Hz, 1H), 7.82 (d,  $J = 8.9$  Hz, 1H), 7.74 – 7.61 (m, 2H), 7.41 (d,  $J = 8.9$  Hz, 1H), 5.63 (s, 2H), 5.56 – 5.44 (m, 4H), 3.92 (t,  $J = 6.1$  Hz, 2H), 3.29 (t,  $J = 7.2$  Hz, 2H), 2.87 – 2.78 (m, 4H), 2.65 (s, 3H), 2.33 – 2.18 (m, 2H), 1.96 – 1.77 (m, 4H), 1.27 (d,  $J =$

6.6 Hz, 12H).  $^{13}\text{C}$  NMR (101 MHz,  $\text{CD}_2\text{Cl}_2$ ): 173.4, 159.1, 156.5, 151.7, 144.0, 135.9, 132.3, 131.3, 131.2, 130.7, 129.6, 128.4, 128.3, 127.2, 127.0(2), 127.0, 126.5, 126.0, 125.1, 124.8, 124.7, 124.4, 122.9, 118.4, 111.4, 81.9, 68.7, 62.3, 60.4, 59.4, 56.6, 44.1, 40.6, 32.5, 28.3, 27.1, 26.9, 22.3. ESI-MS calculated for  $[\text{C}_{64}\text{H}_{52}\text{F}_{18}\text{N}_6\text{O}_7\text{Eu} - \text{hfac}]^+$  ( $[[\text{L2Eu}(\text{hfac})_3] - \text{hfac}]^+$ ):  $m/z$  1290.3; found: 1290.1. Elemental analysis calculated for  $\text{C}_{64}\text{H}_{52}\text{F}_{18}\text{N}_6\text{O}_7\text{Eu}$  ( $[\text{L2Eu}(\text{hfac})_3]$ ) (%): C 51.35, H 3.50, N 4.68; found (%): C 51.39, H 3.58, N 4.70.

**[L2Y(hfac)<sub>3</sub>]**. Yield: 78%.  $^1\text{H}$  NMR (400 MHz,  $\text{CD}_2\text{Cl}_2$ ): 8.35 (d,  $J = 9.3$  Hz, 1H), 8.22 – 7.86 (m, 10H), 7.53 – 7.44 (m, 4H), 7.43 – 7.34 (m, 2H), 7.32 (s, 2H), 5.93 (s, 3H), 4.46 – 4.35 (m, 4H), 4.24 (t,  $J = 5.7$  Hz, 2H), 3.52 (t,  $J = 6.8$  Hz, 2H), 2.18 (qq,  $J = 7.3, 3.8$  Hz, 4H), 1.83 (ddq,  $J = 24.4, 13.3, 6.5$  Hz, 6H), 1.06 (d,  $J = 6.1$  Hz, 12H).  $^{13}\text{C}$  NMR (101 MHz,  $\text{CD}_2\text{Cl}_2$ ): 175.8, 175.5, 175.1, 174.8, 167.7, 148.9, 148.8, 148.7, 140.1, 136.1, 135.8, 131.3, 130.8, 129.9, 128.6, 127.4, 127.3, 127.2, 126.6, 126.0, 125.1, 125.0, 124.9, 124.8, 124.7(5), 124.7(3), 123.7, 123.1, 122.3, 122.0, 119.2, 116.3, 113.5, 109.7, 109.3, 89.5, 69.2, 44.5, 38.2, 32.7, 28.6, 27.4, 26.5, 22.1. ESI-MS calculated for  $[\text{C}_{64}\text{H}_{52}\text{N}_5\text{O}_7\text{F}_{18}\text{Y} - \text{hfac}]^+$  ( $[[\text{L2Y}(\text{hfac})_3] - \text{hfac}]^+$ ):  $m/z$  1226.3; found: 1227.0. Elemental analysis calculated for  $\text{C}_{64}\text{H}_{52}\text{N}_5\text{O}_7\text{F}_{18}\text{Y}$  ( $[\text{L2Y}(\text{hfac})_3]$ ) (%): C 53.60, H 3.66, N 4.88; found (%): C 53.59, H 3.80, N 4.92.

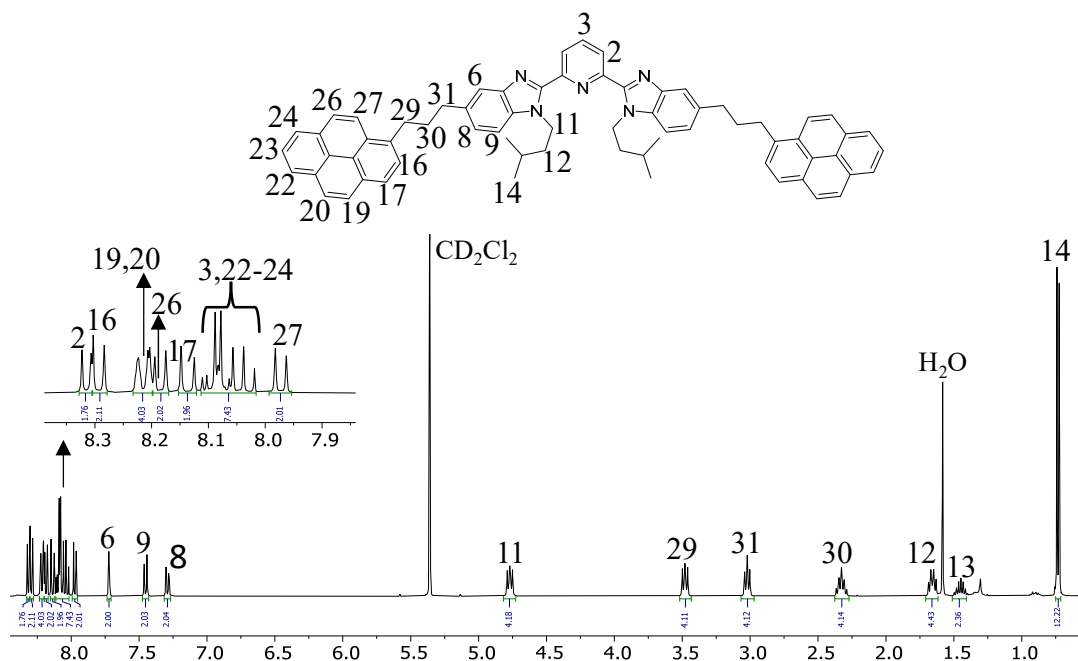

Figure A1-2. <sup>1</sup>H NMR spectrum of ligand L1 in CD<sub>2</sub>Cl<sub>2</sub>.

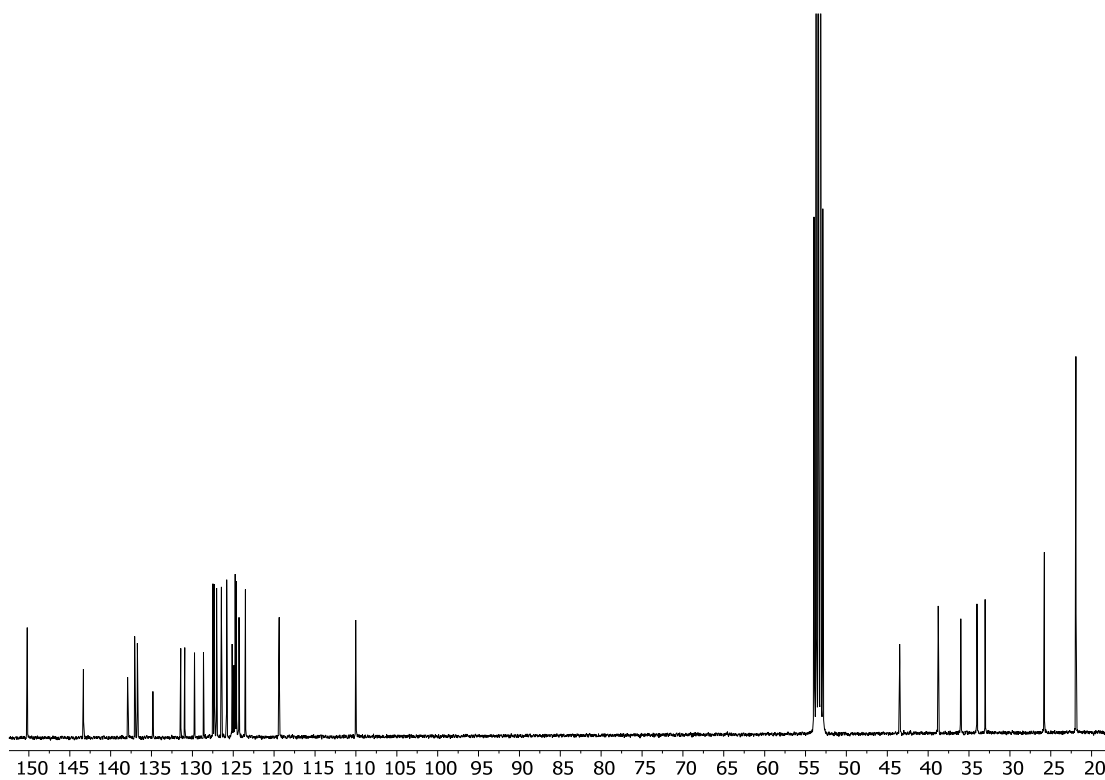

Figure A1-3. <sup>13</sup>C NMR spectrum of ligand L1 in CD<sub>2</sub>Cl<sub>2</sub>.

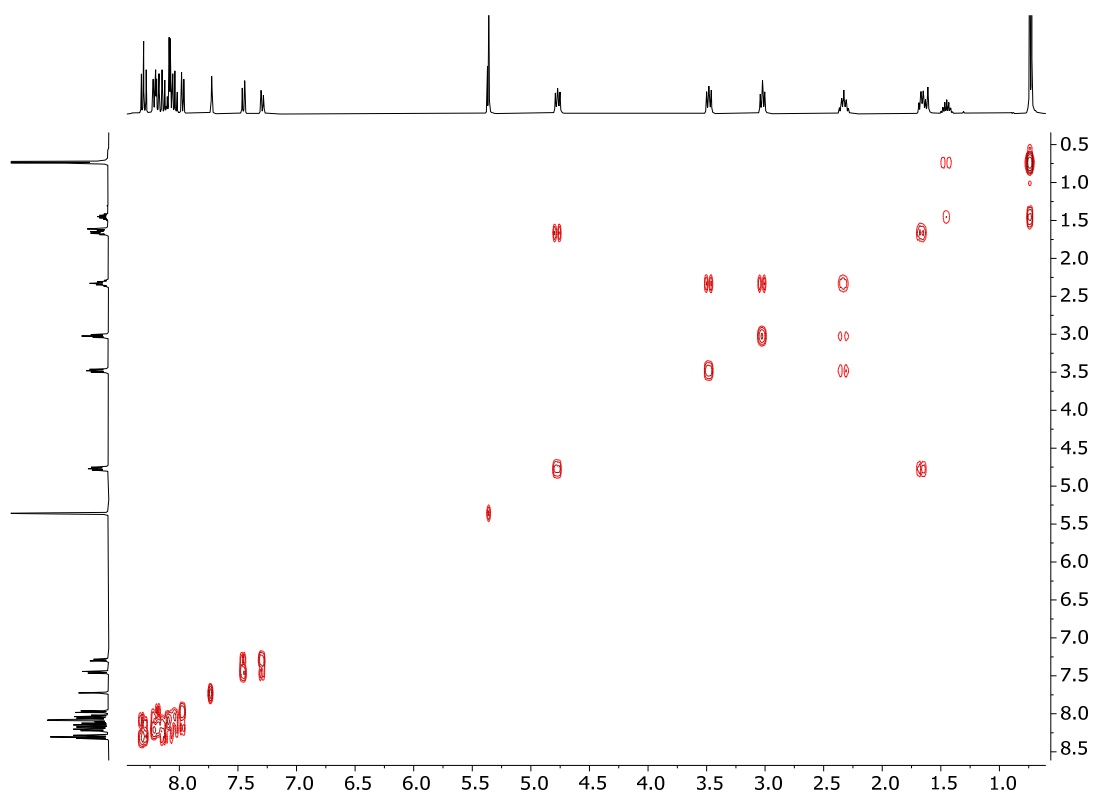

**Figure A1-4.** COSY spectrum of ligand **L1** in  $\text{CD}_2\text{Cl}_2$ .

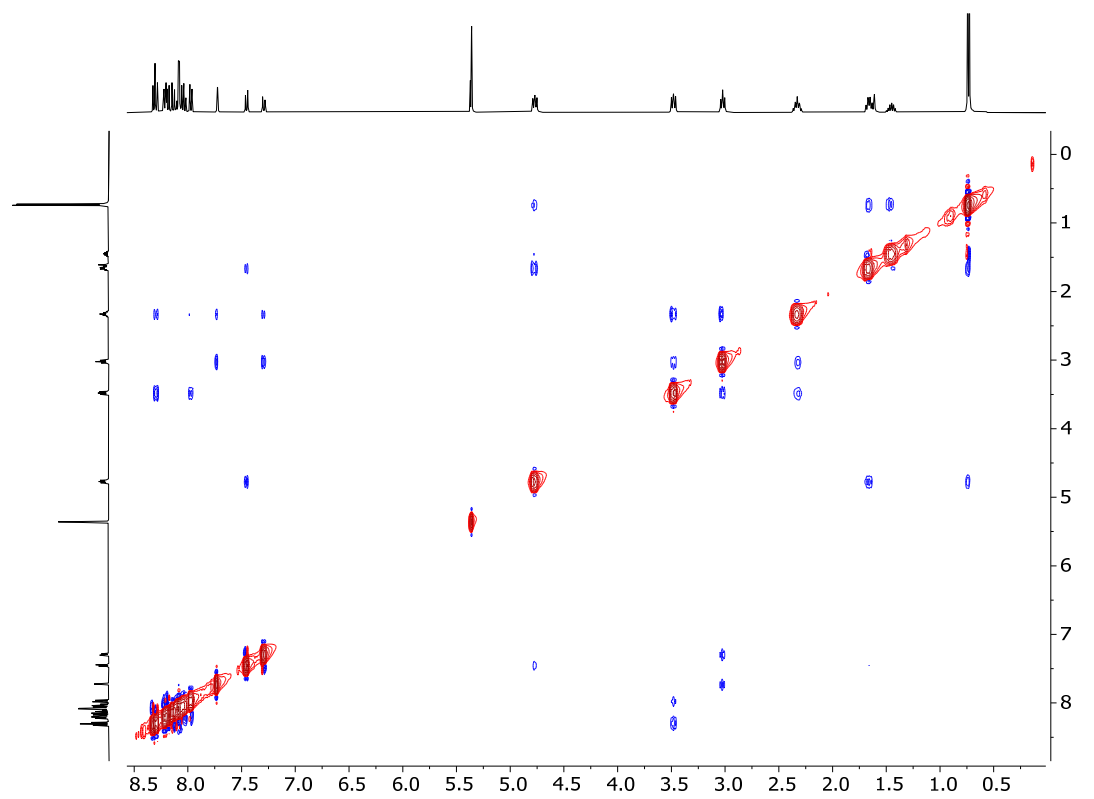

**Figure A1-5.** NOESY spectrum of ligand **L1** in  $\text{CD}_2\text{Cl}_2$ .

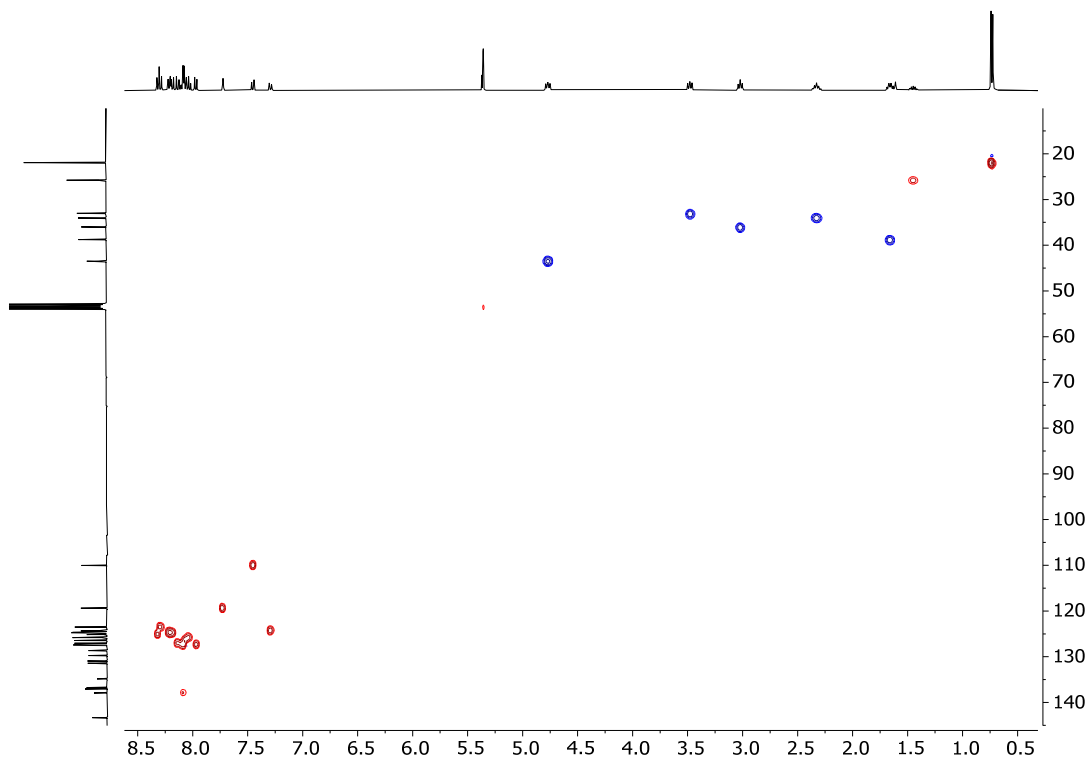

Figure A1-6. HSQC spectrum of ligand L1 in CD<sub>2</sub>Cl<sub>2</sub>.

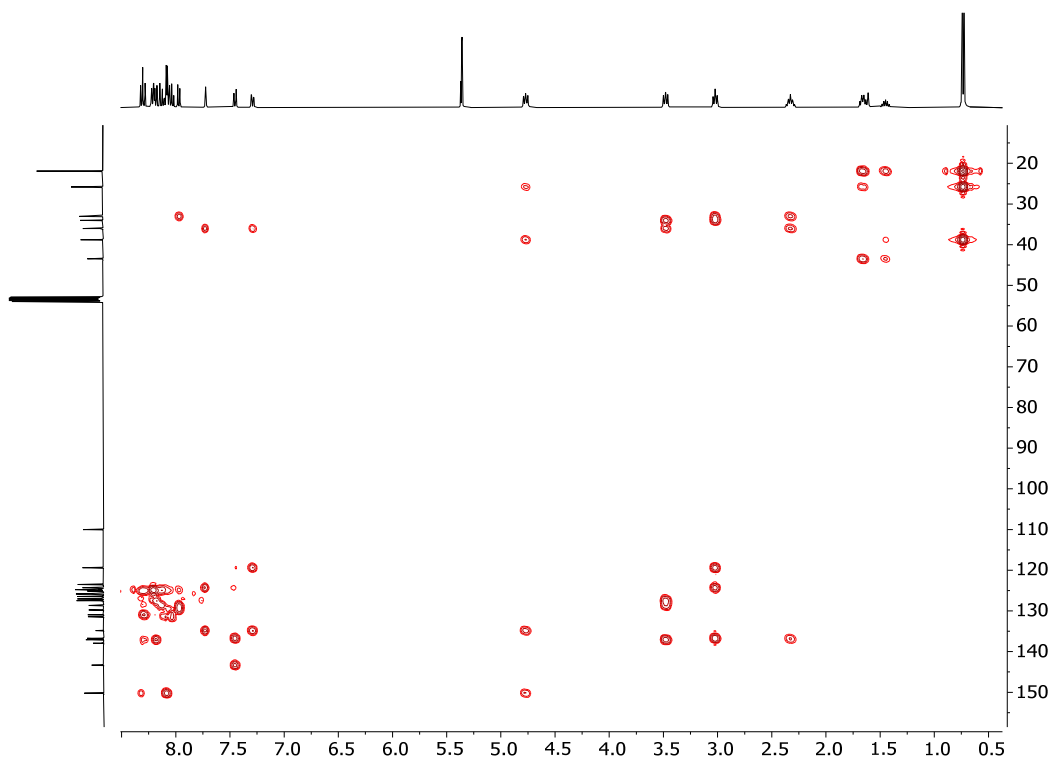

Figure A1-7. HMBC spectrum of ligand L1 in CD<sub>2</sub>Cl<sub>2</sub>.

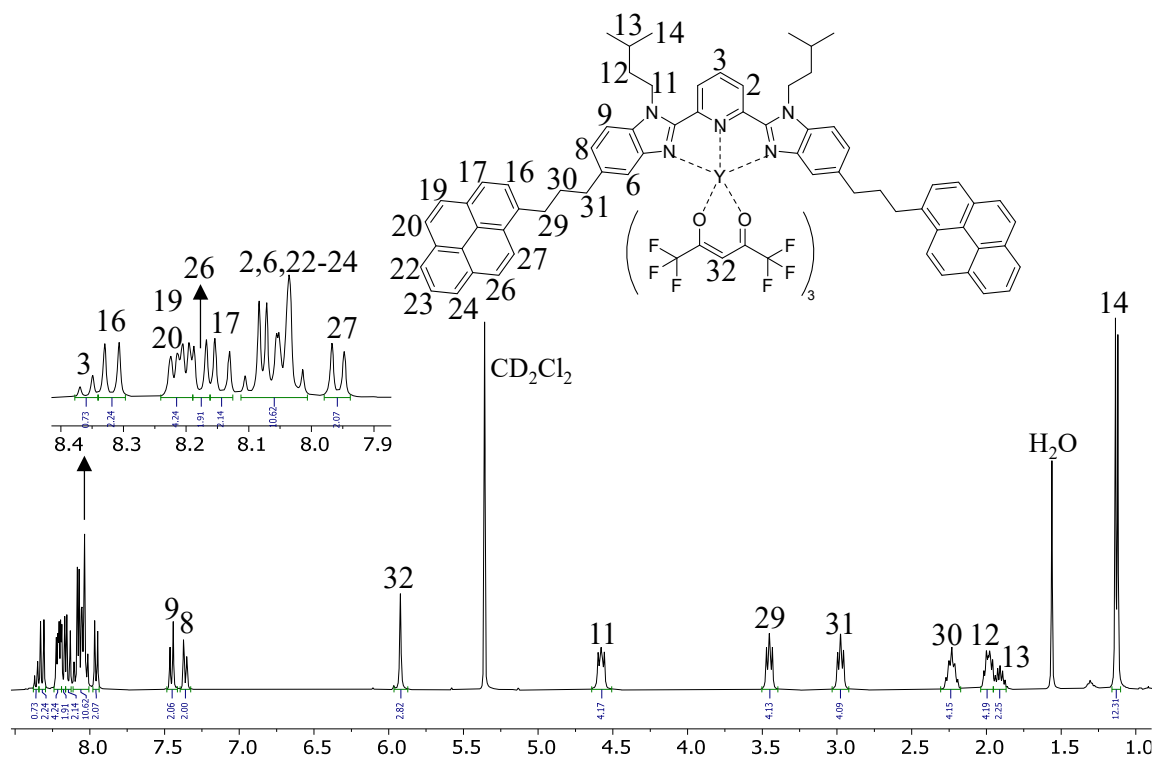

Figure A1-8.  $^1\text{H}$  NMR spectrum of  $[\text{L1Y}(\text{hfac})_3]$  in  $\text{CD}_2\text{Cl}_2$ .

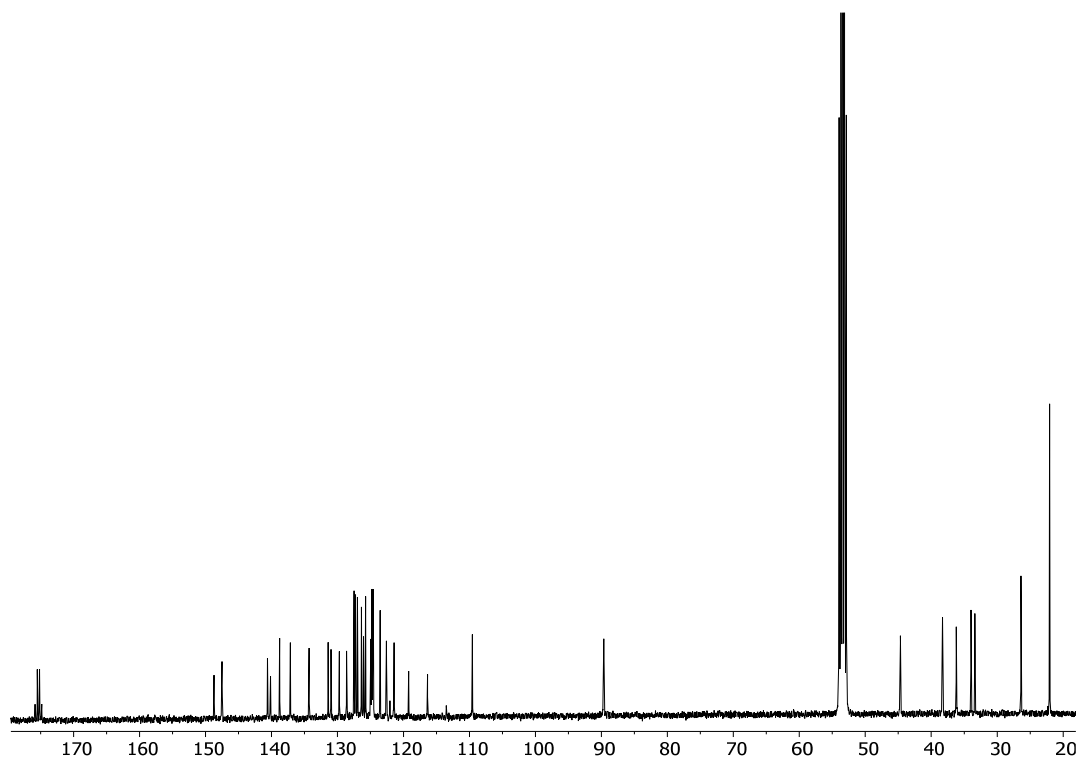

Figure A1-9.  $^{13}\text{C}$  NMR spectrum of  $\text{L2}$  in  $\text{CD}_2\text{Cl}_2$ .

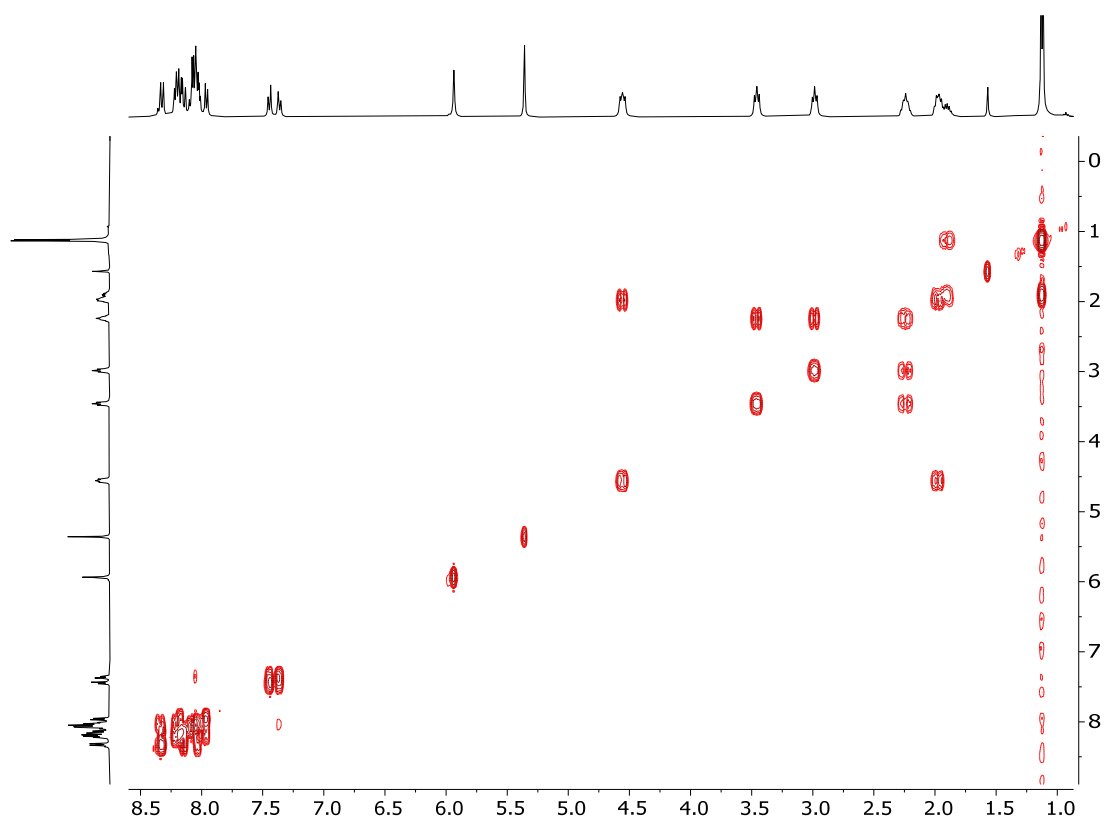

Figure A1-10. COSY spectrum of [L1Y(hfac)<sub>3</sub>] in CD<sub>2</sub>Cl<sub>2</sub>.

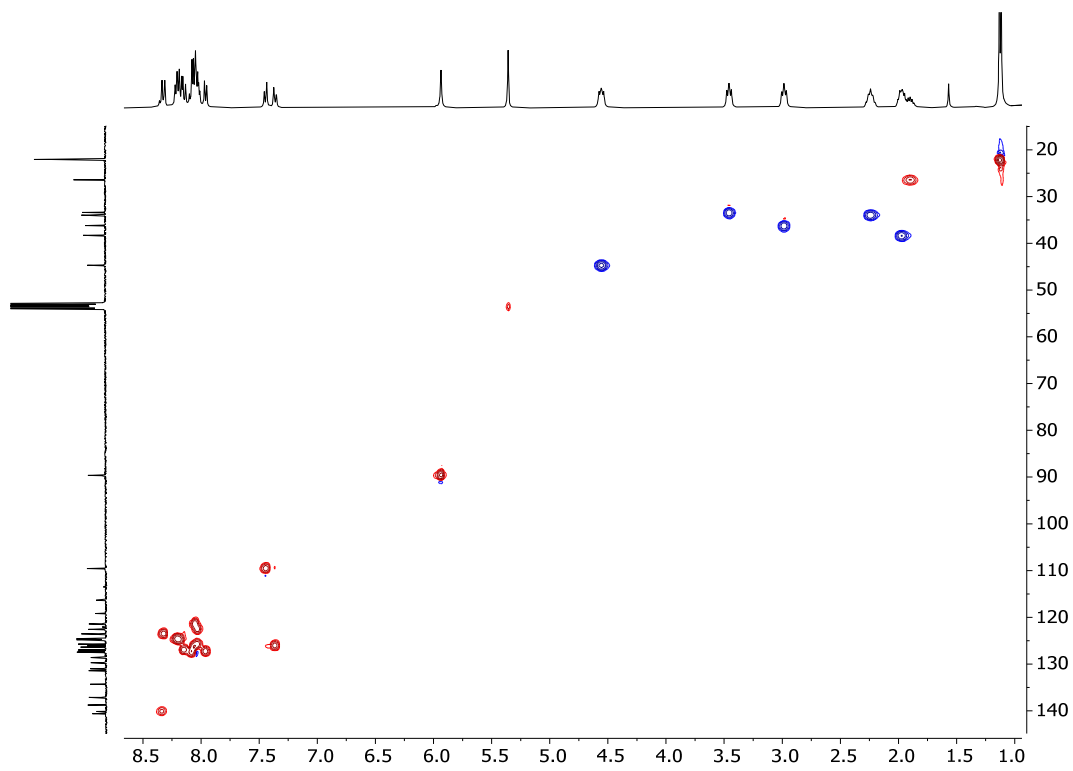

Figure A1-11. HSQC spectrum of [L1Y(hfac)<sub>3</sub>] in CD<sub>2</sub>Cl<sub>2</sub>.

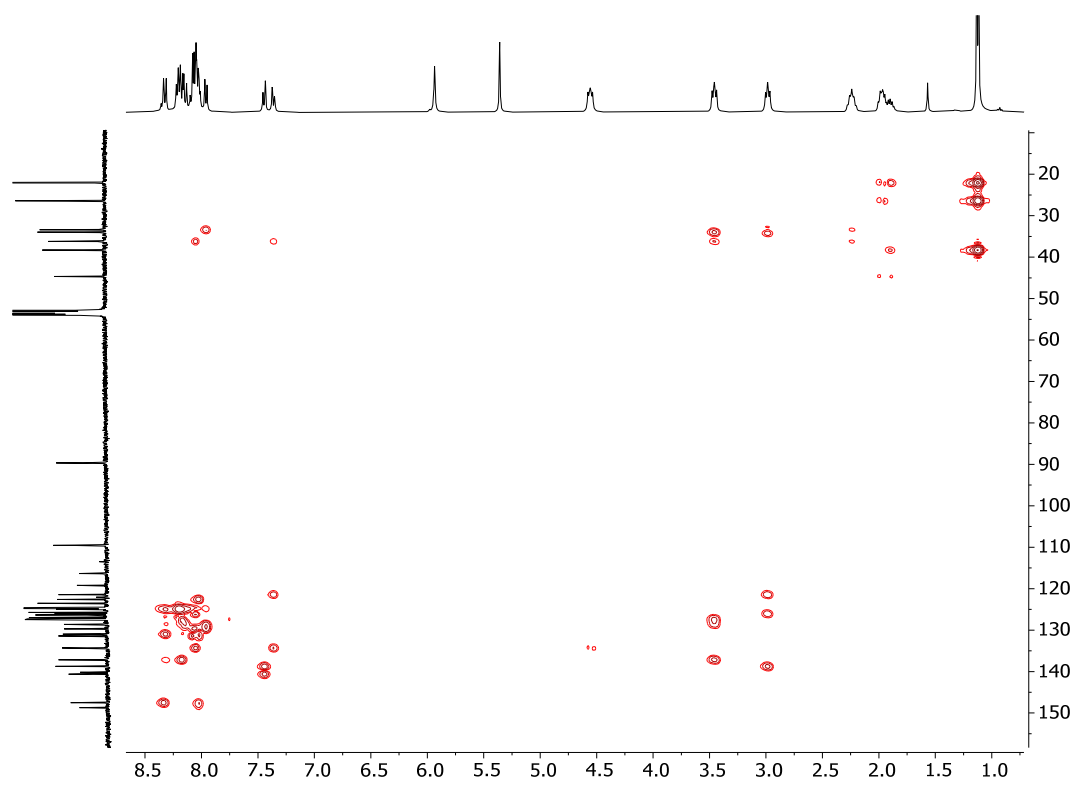

**Figure A1-12.** HMBC spectrum of  $[\text{L1Y}(\text{hfac})_3]$  in  $\text{CD}_2\text{Cl}_2$ .

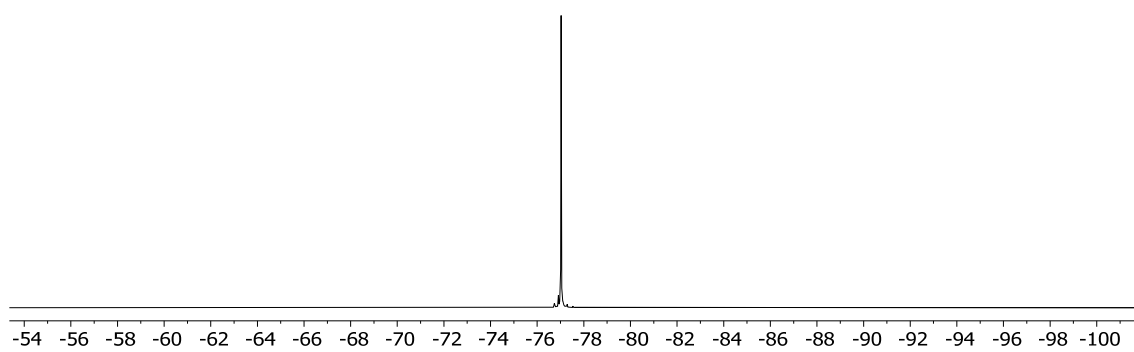

**Figure A1-13.**  $^{19}\text{F}$  NMR spectrum of  $[\text{L1Y}(\text{hfac})_3]$  in  $\text{CD}_2\text{Cl}_2$ .

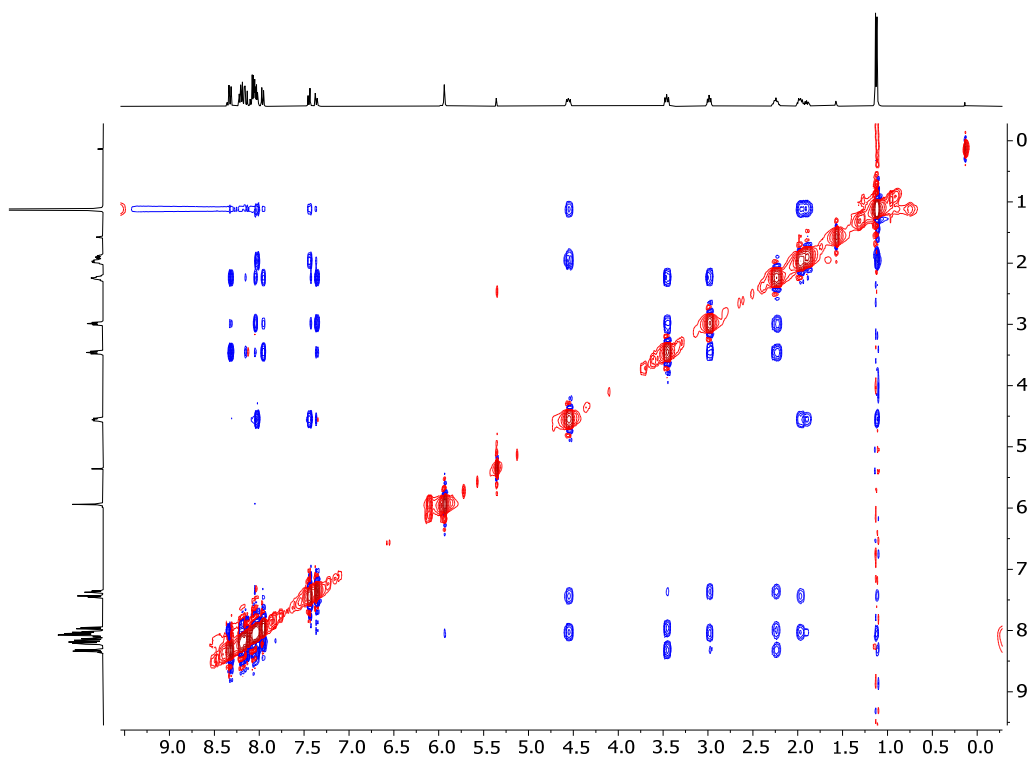

Figure A1-14. NOESY spectrum of [L1Y(hfac)<sub>3</sub>] at 0.02 M in CD<sub>2</sub>Cl<sub>2</sub>.

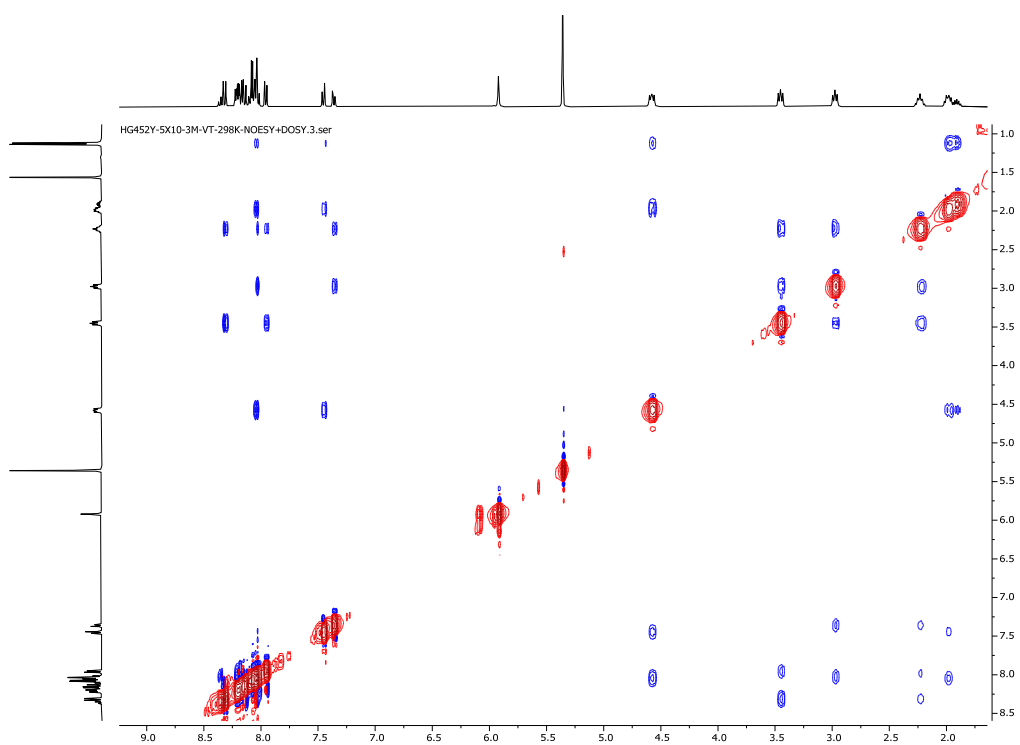

Figure A1-15. NOESY spectrum of [L1Y(hfac)<sub>3</sub>] at 0.005 M in CD<sub>2</sub>Cl<sub>2</sub>.

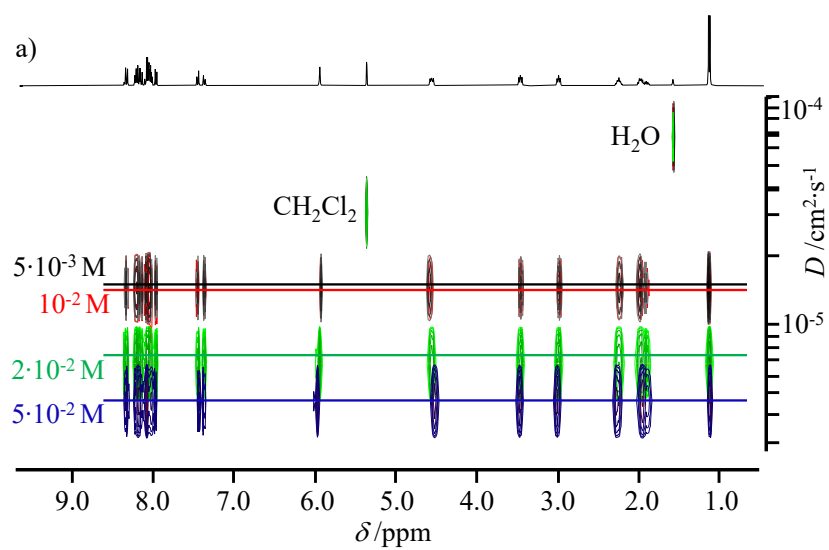

**Figure A1-16.** DOSY spectrum of  $[\text{L1Y}(\text{hfac})_3]$  in  $\text{CD}_2\text{Cl}_2$ .

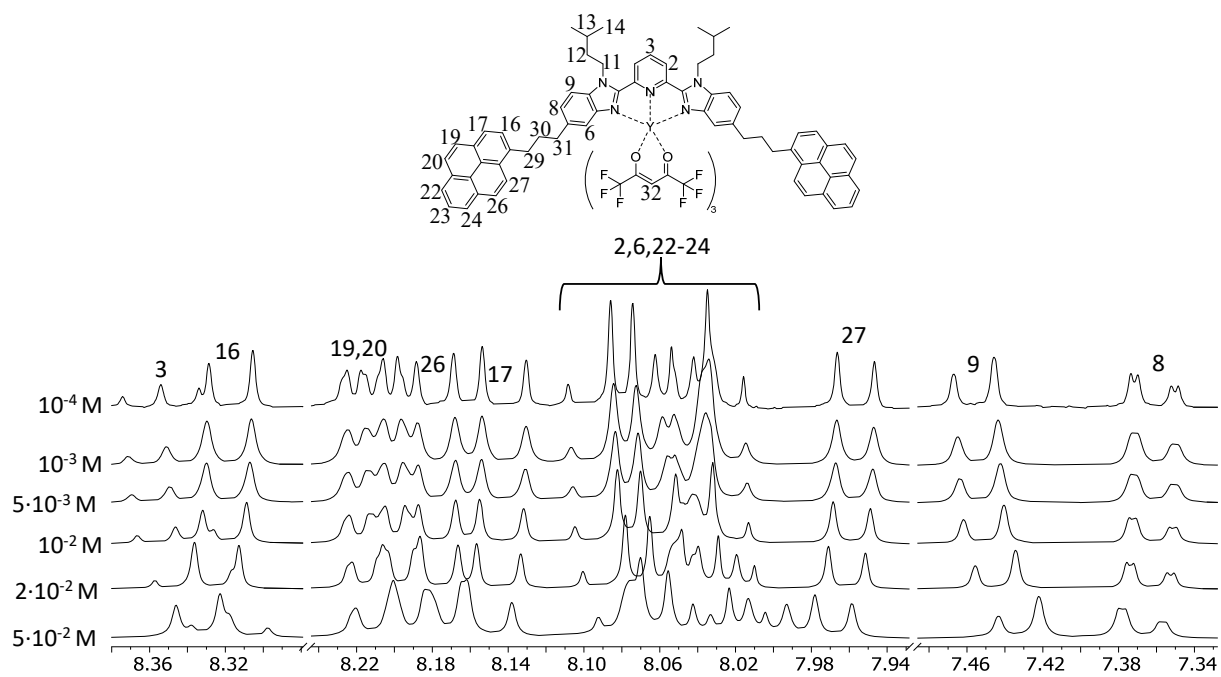

**Figure A1-17.**  $^1\text{H}$  NMR spectrum of  $[\text{L1Y}(\text{hfac})_3]$  in  $\text{CD}_2\text{Cl}_2$  upon increasing concentration.

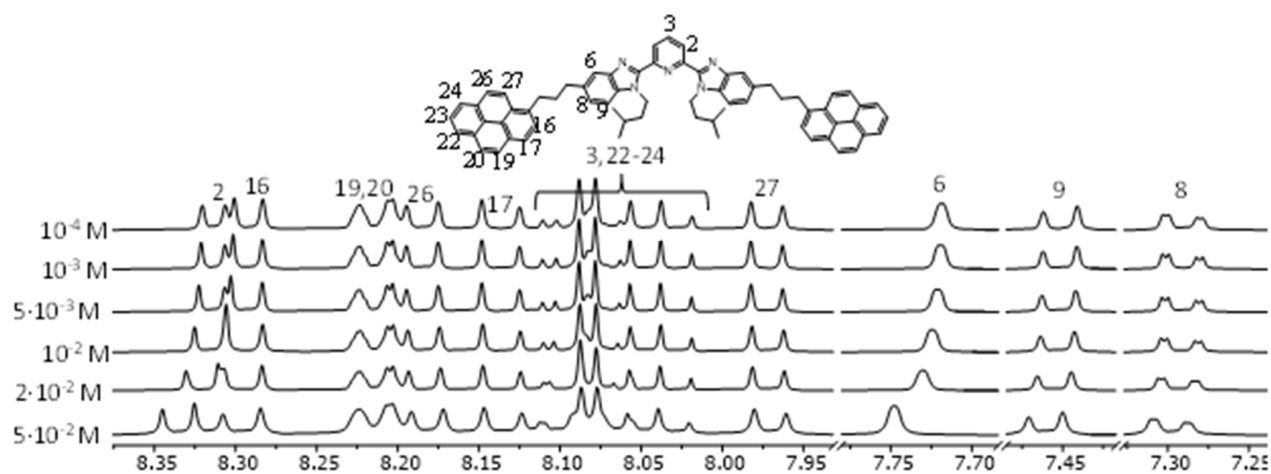

**Figure A1-18.**  $^1\text{H}$  NMR spectrum of L1 in  $\text{CD}_2\text{Cl}_2$  upon increasing concentration.

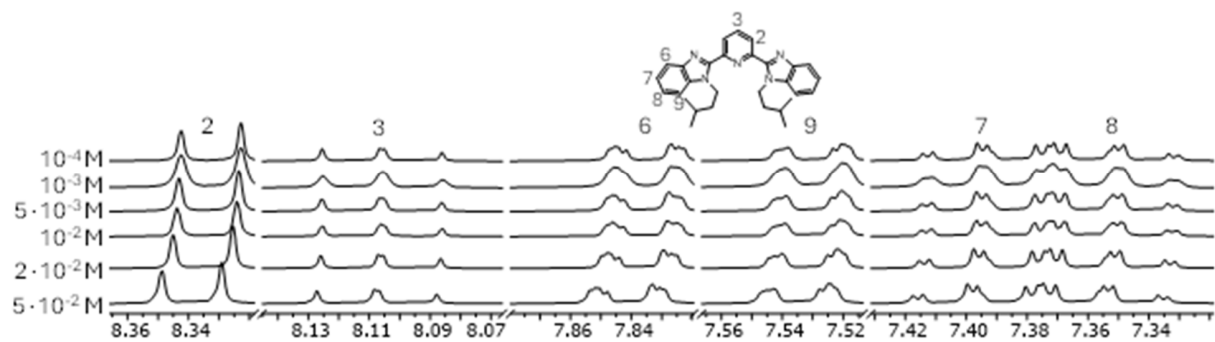

**Figure A1-19.**  $^1\text{H}$  NMR spectrum of L0 in  $\text{CD}_2\text{Cl}_2$  upon increasing concentration.

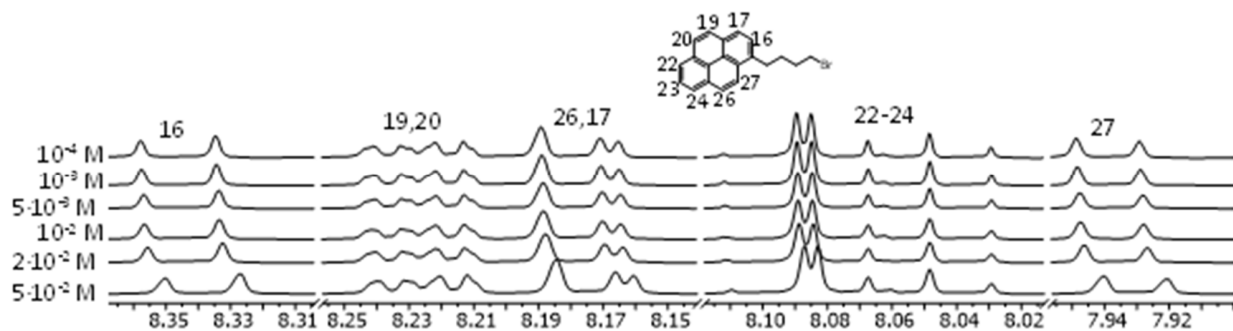

**Figure A1-20.**  $^1\text{H}$  NMR spectrum of 1 in  $\text{CD}_2\text{Cl}_2$  upon increasing concentration.

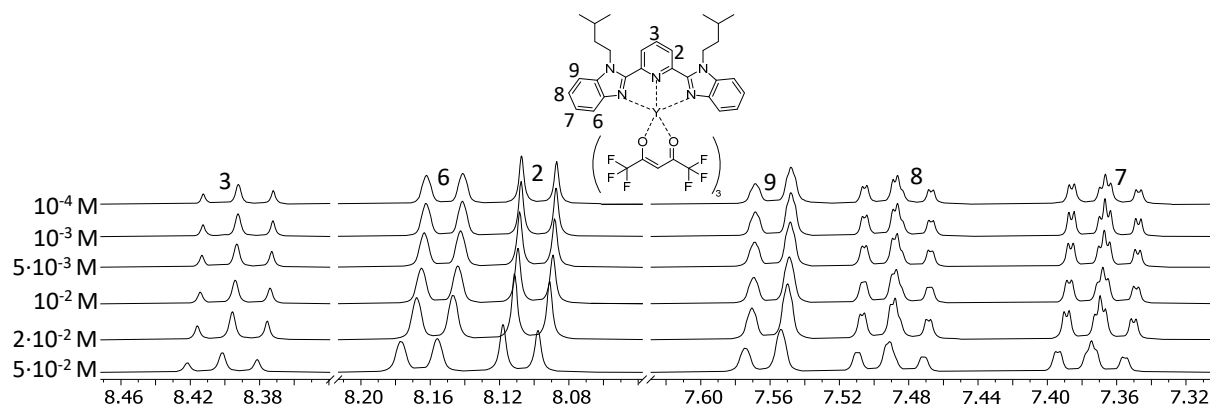

**Figure A1-21.**  $^1\text{H}$  NMR spectrum of  $[\text{L0Y}(\text{hfac})_3]$  in  $\text{CD}_2\text{Cl}_2$  upon increasing concentration.

HG452Eu-all.7.fid

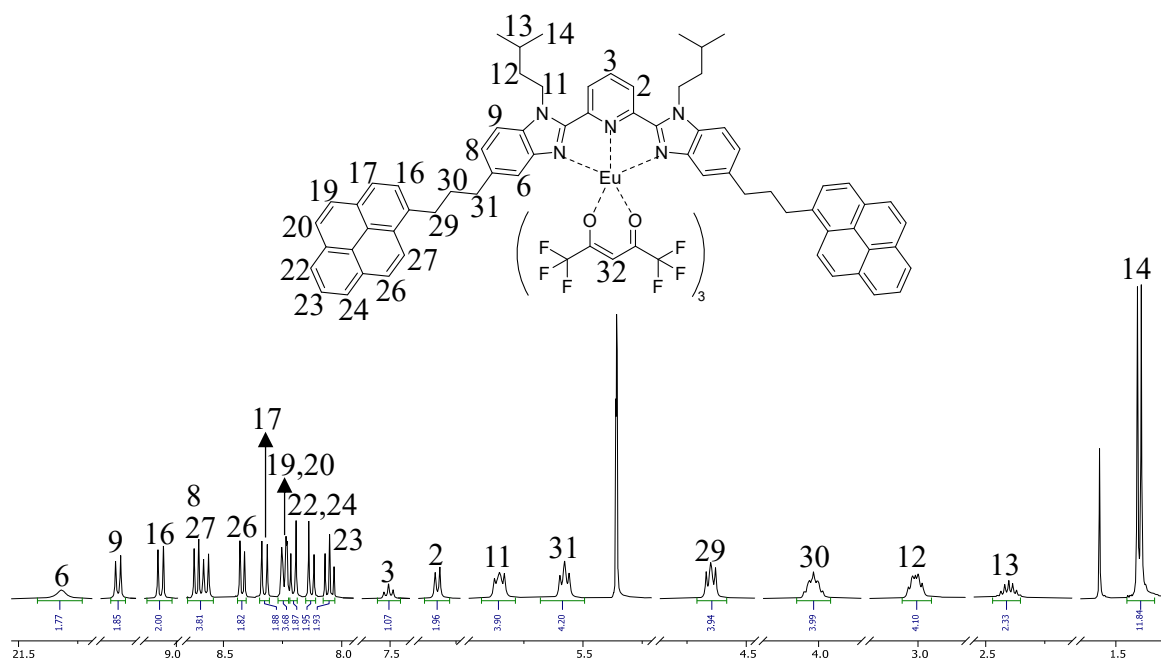

**Figure A1-22.**  $^1\text{H}$  NMR spectrum of  $[\text{L1Eu}(\text{hfac})_3]$  in  $\text{CD}_2\text{Cl}_2$ .

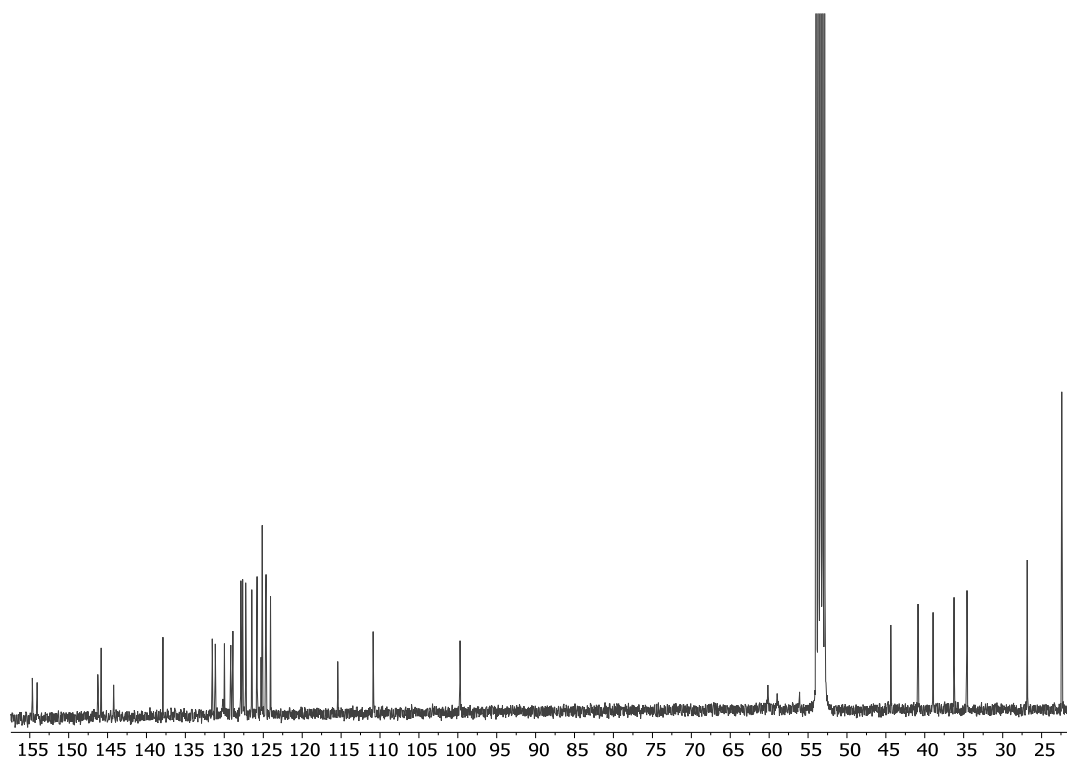

**Figure A1-23.**  $^{13}\text{C}$  NMR spectrum of  $[\text{L1Eu}(\text{hfac})_3]$  in  $\text{CD}_2\text{Cl}_2$ .

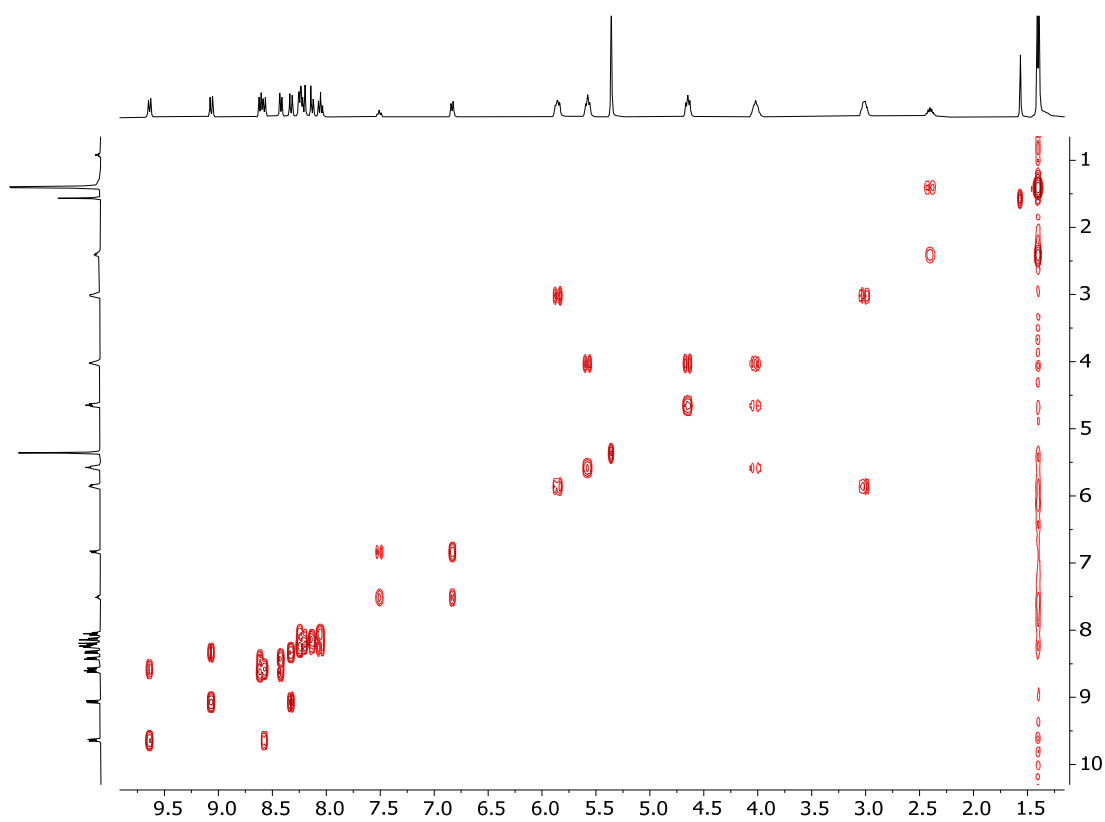

**Figure A1-24.** COSY spectrum of  $[\text{L1Eu}(\text{hfac})_3]$  in  $\text{CD}_2\text{Cl}_2$ .

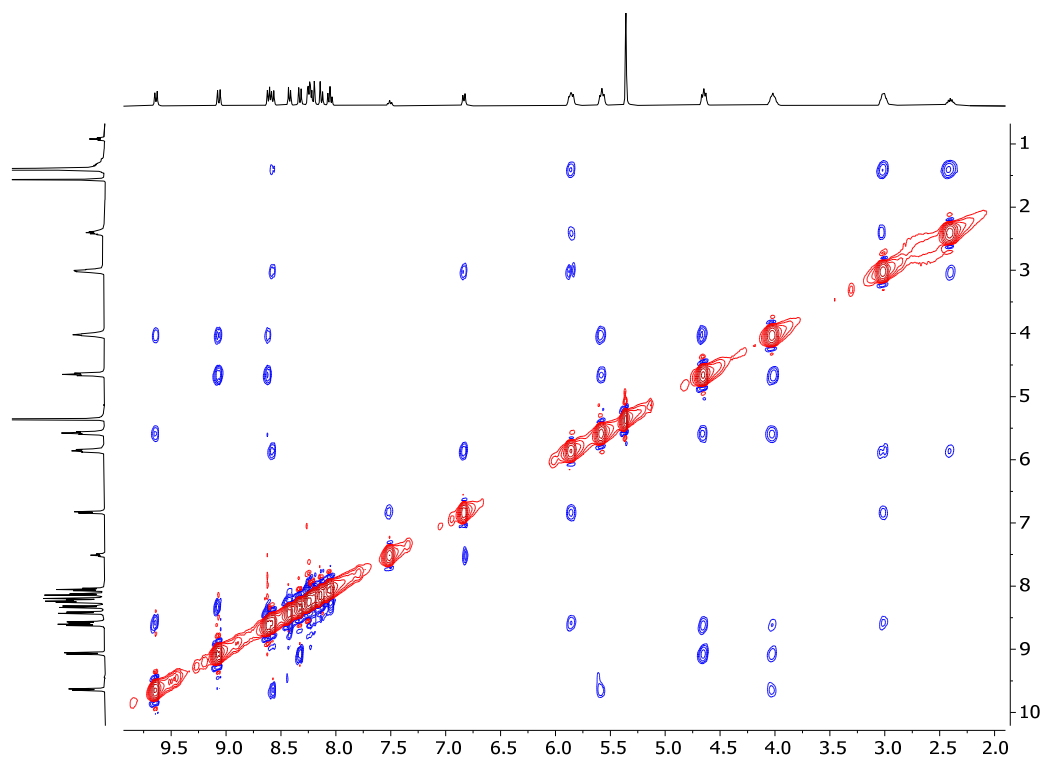

Figure A1-25. NOESY spectrum of  $[L1Eu(hfac)_3]$  in  $CD_2Cl_2$ .

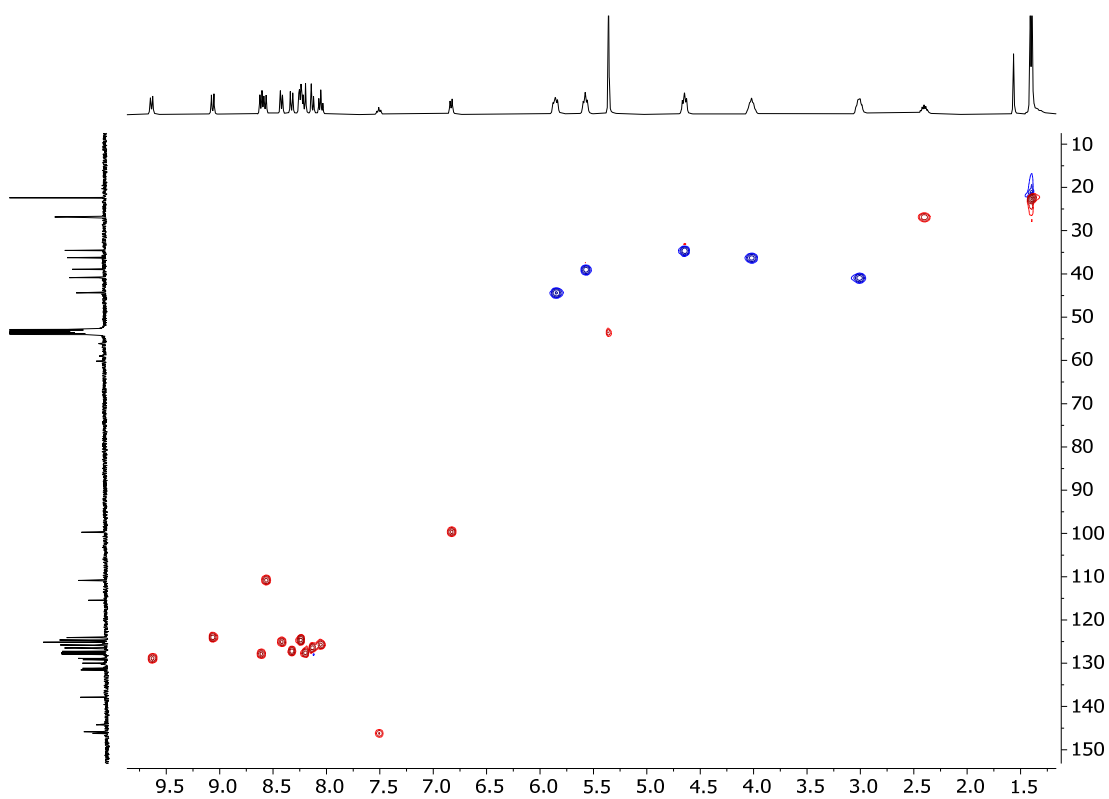

Figure A1-26. HSQC spectrum of  $[L1Eu(hfac)_3]$  in  $CD_2Cl_2$ .

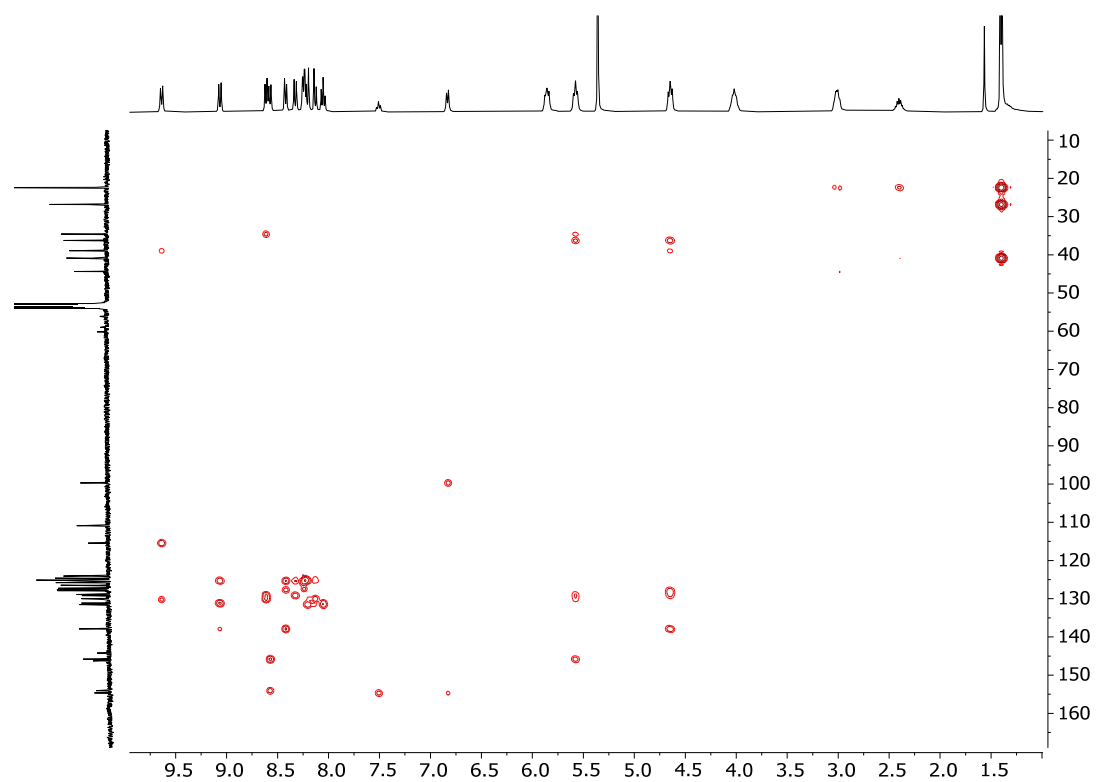

Figure A1-27. HMBC spectrum of [L1Eu(hfac)<sub>3</sub>] in CD<sub>2</sub>Cl<sub>2</sub>.

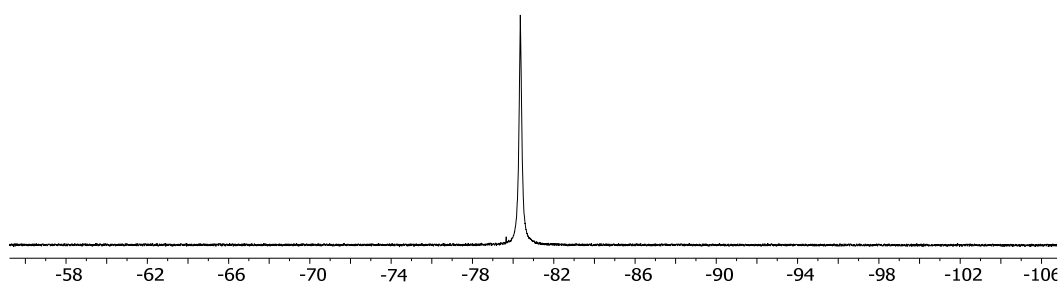

Figure A1-28. <sup>19</sup>F NMR spectrum of [L1Eu(hfac)<sub>3</sub>] in CD<sub>2</sub>Cl<sub>2</sub>.

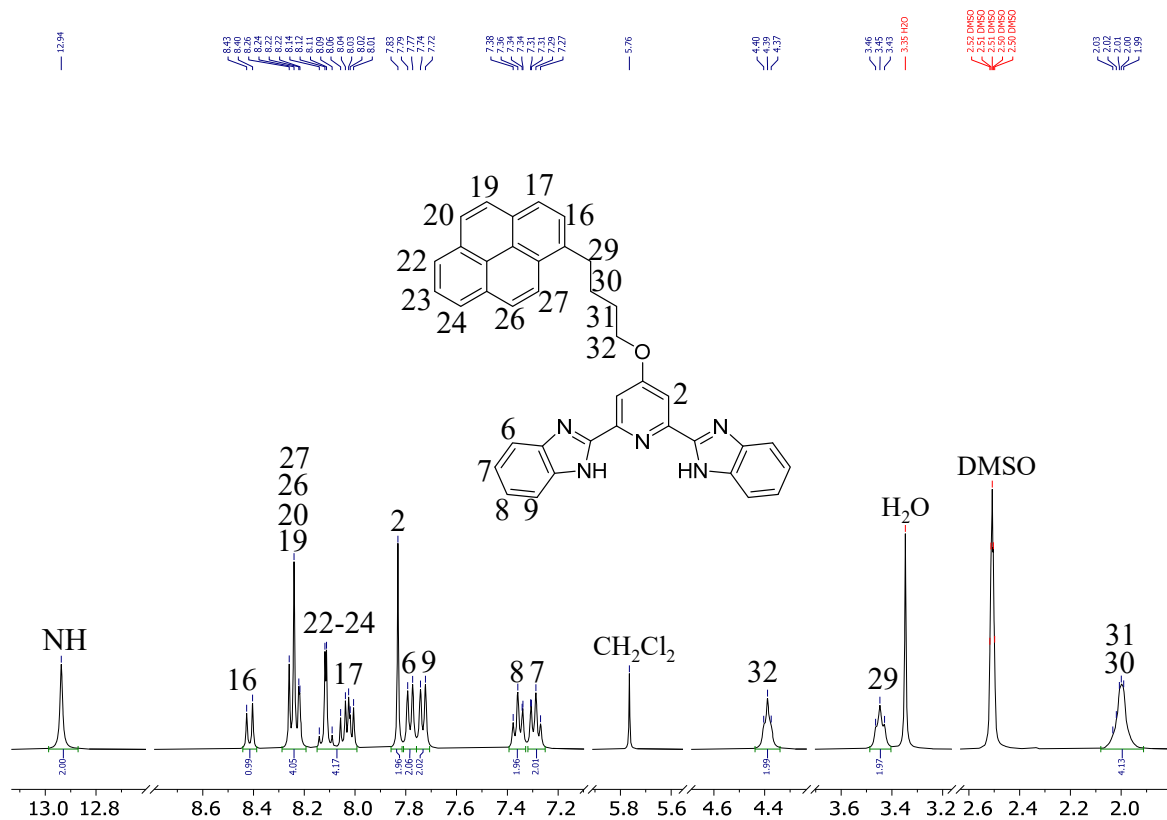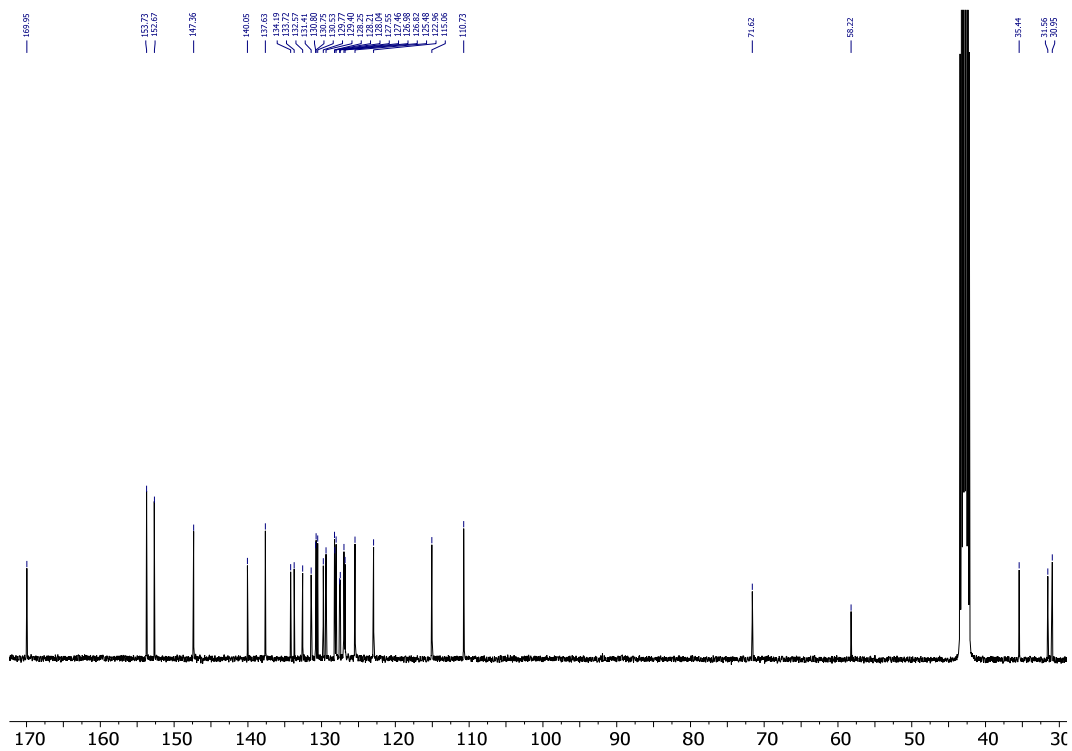

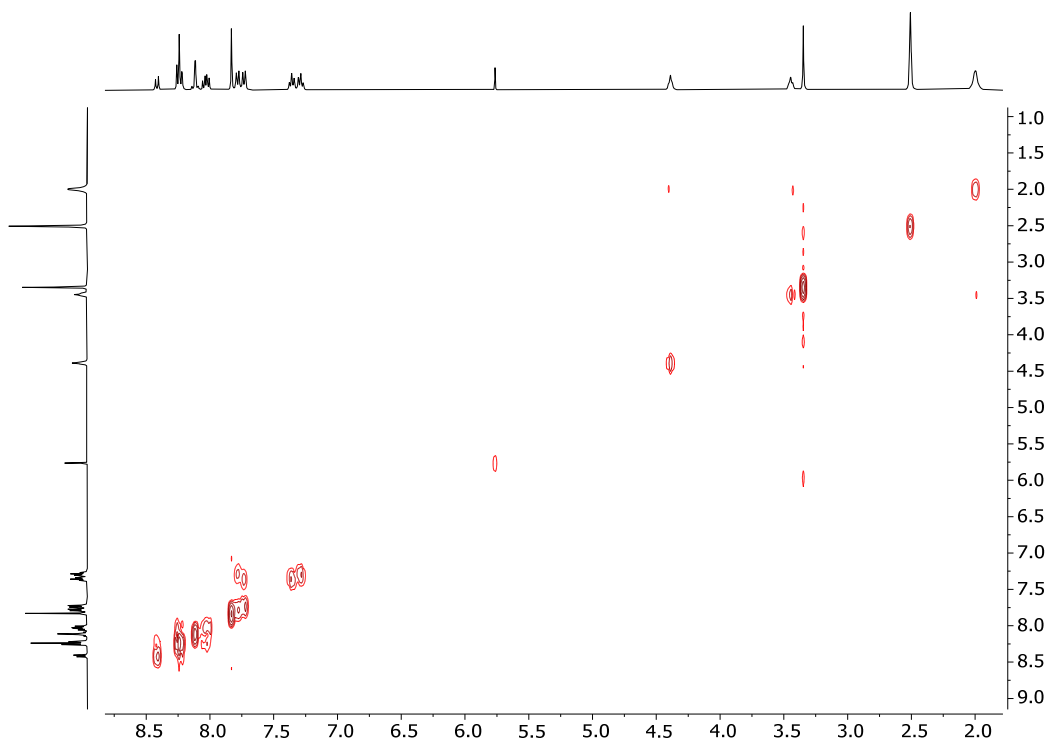

**Figure A1-31.** COSY spectrum of **3** in DMSO-*d*<sub>6</sub>.

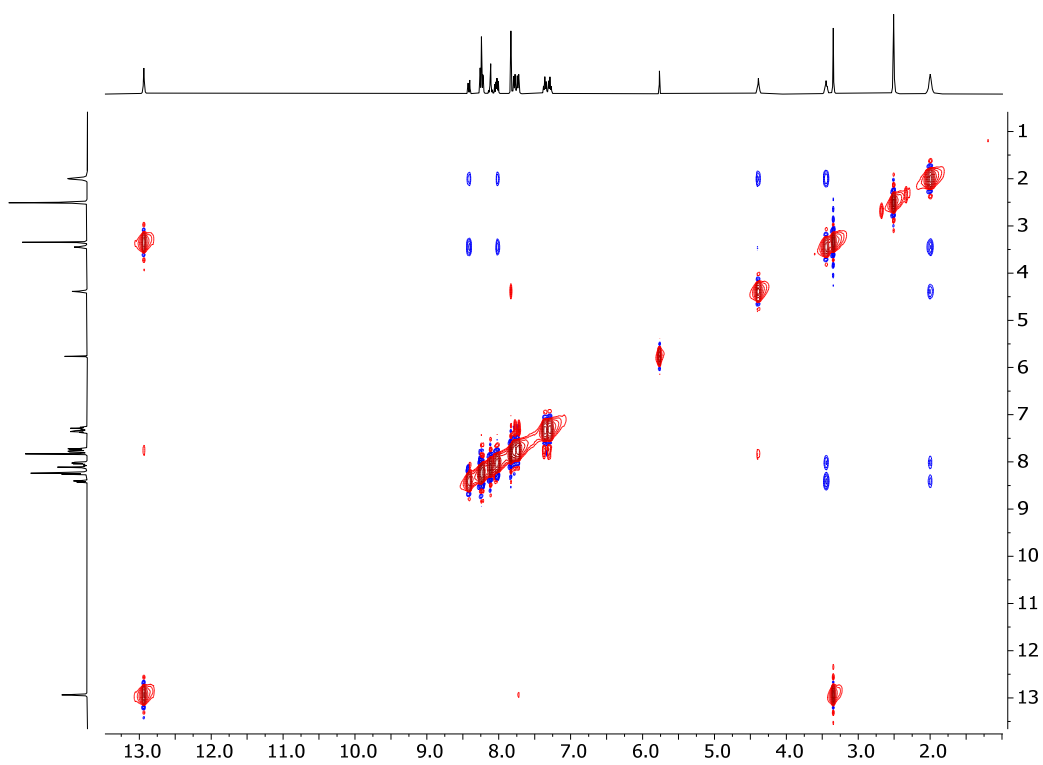

**Figure A1-32.** NOESY spectrum of **3** in DMSO-*d*<sub>6</sub>.

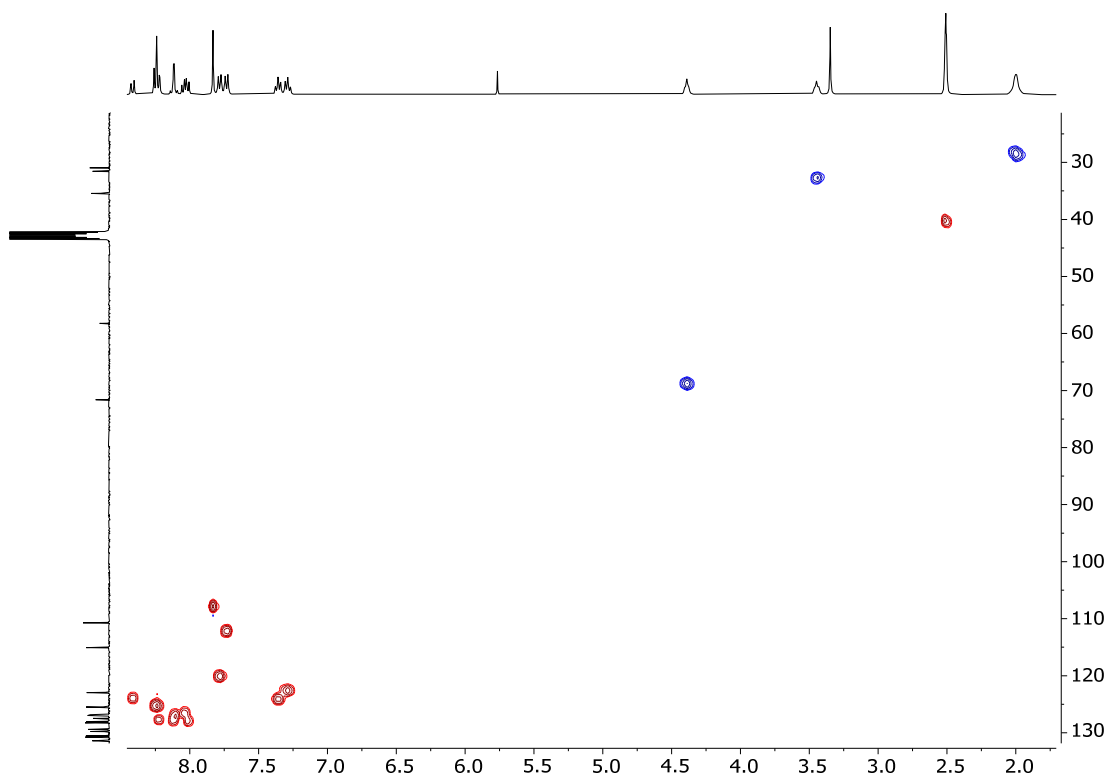

Figure A1-33. HSQC spectrum of **3** in DMSO-*d*<sub>6</sub>.

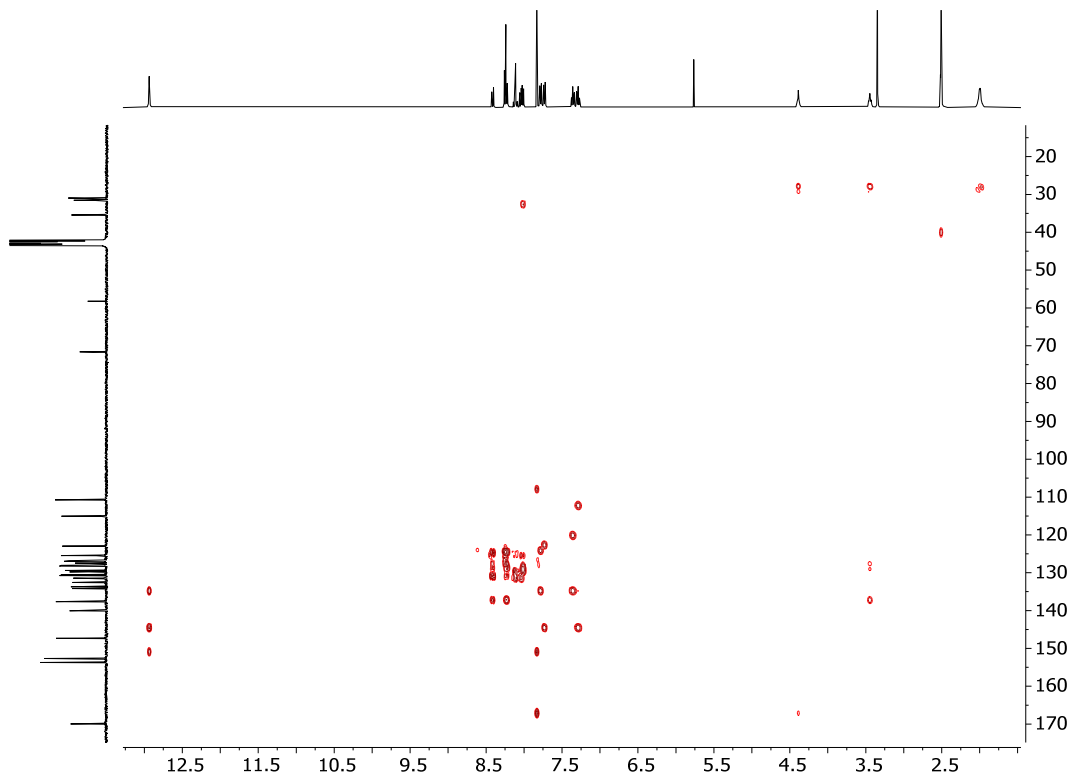

Figure A1-34. HMBC spectrum of **3** in DMSO-*d*<sub>6</sub>.

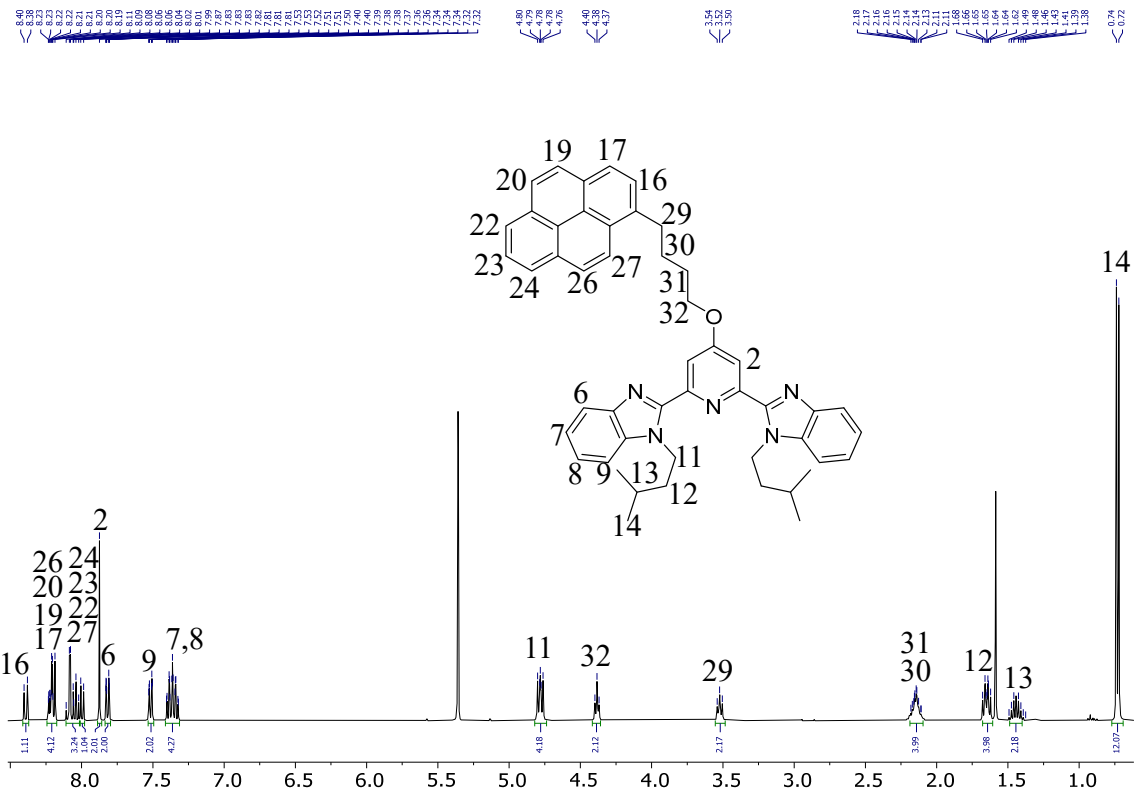

Figure A1-35. <sup>1</sup>H NMR spectrum of L2 in CD<sub>2</sub>Cl<sub>2</sub>.

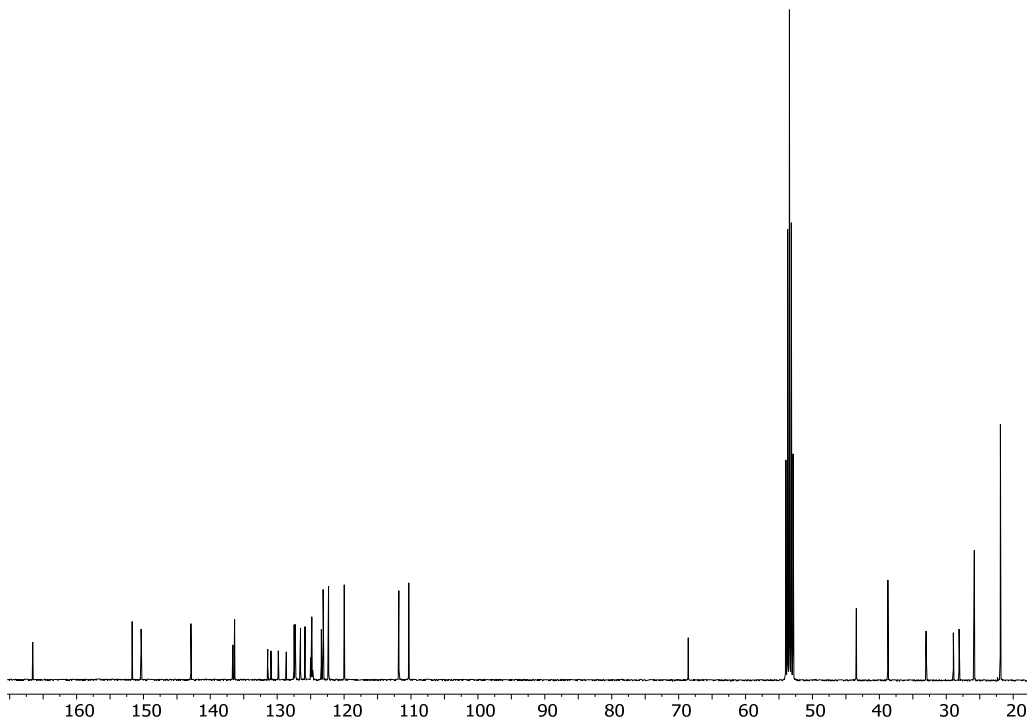

Figure A1-36. <sup>13</sup>C NMR spectrum of L2 in CD<sub>2</sub>Cl<sub>2</sub>.

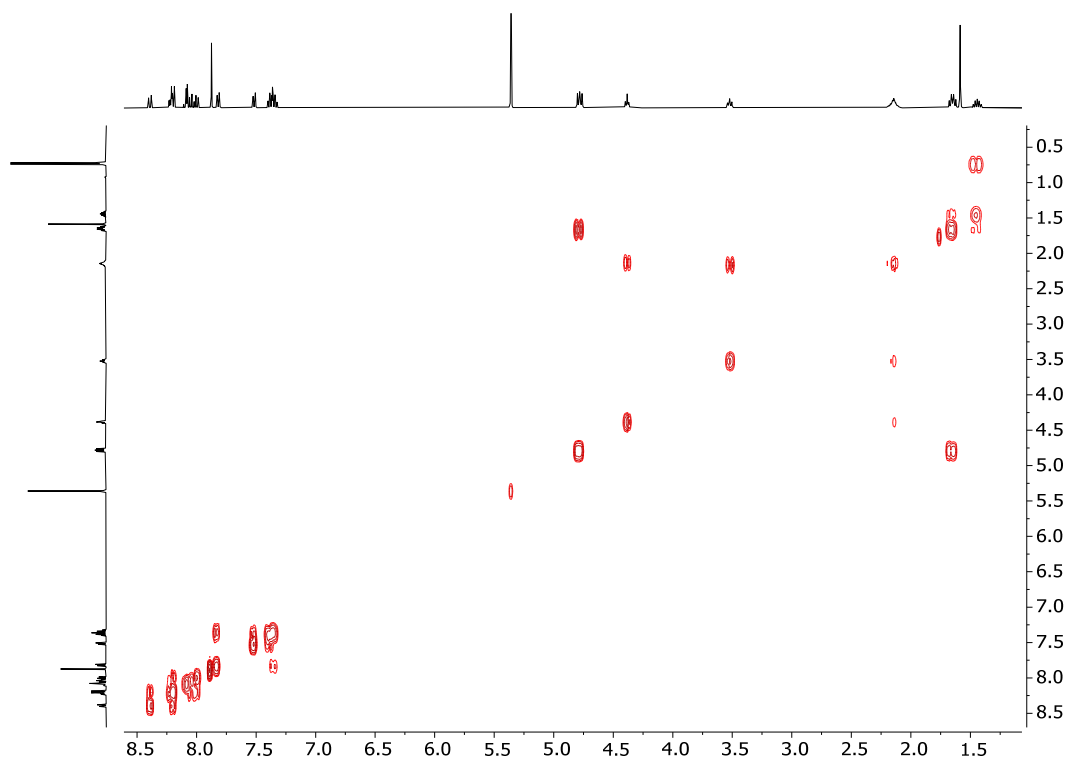

Figure A1-37. COSY spectrum of L2 in CD<sub>2</sub>Cl<sub>2</sub>.

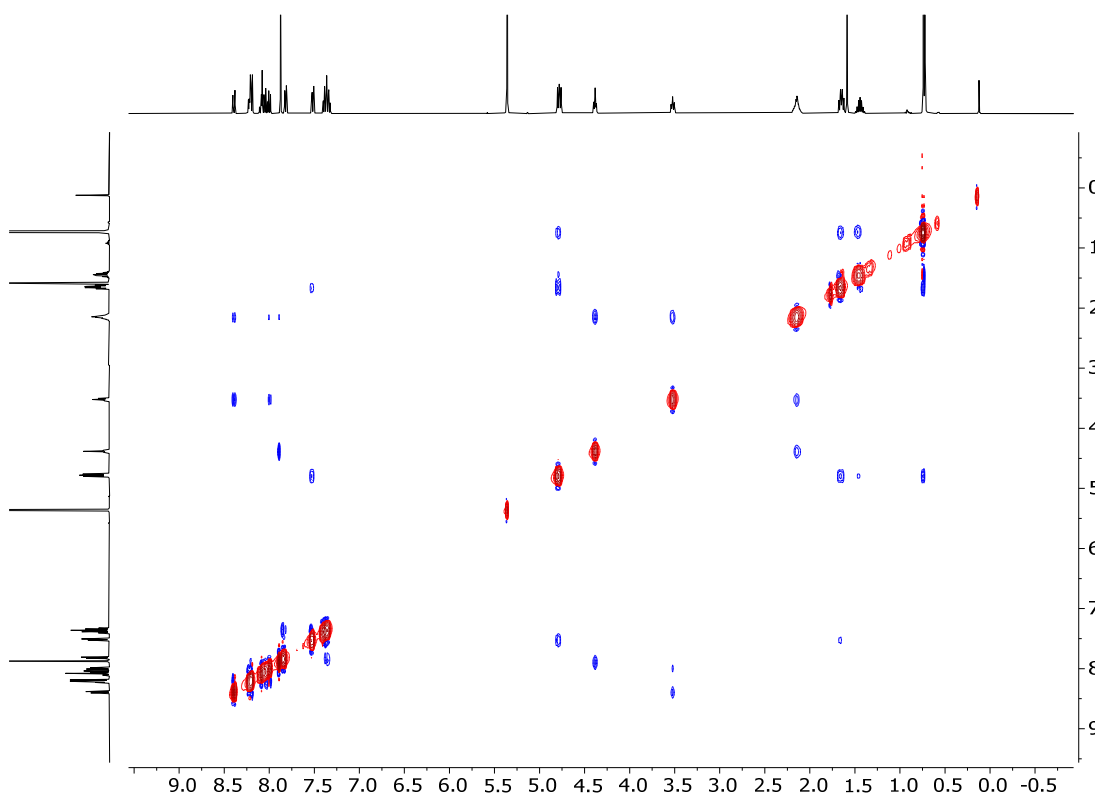

Figure A1-38. NOESY spectrum of L2 in CD<sub>2</sub>Cl<sub>2</sub>.

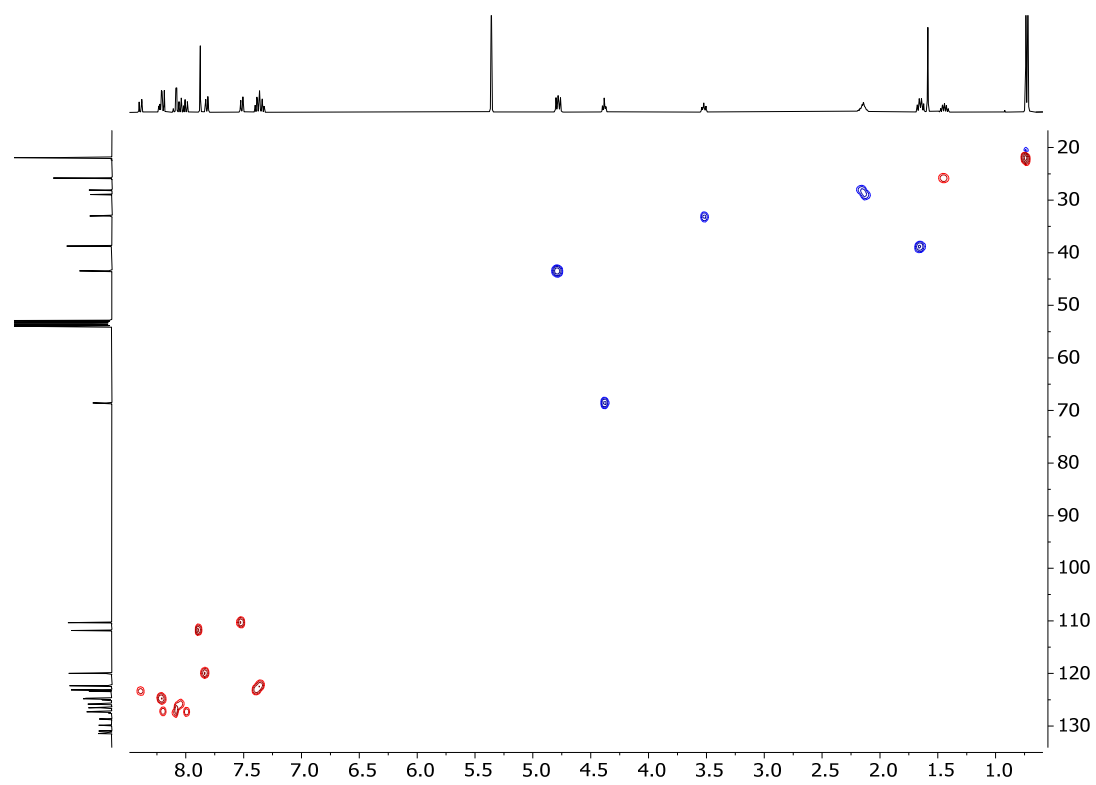

Figure A1-39. HSQC spectrum of L2 in CD<sub>2</sub>Cl<sub>2</sub>.

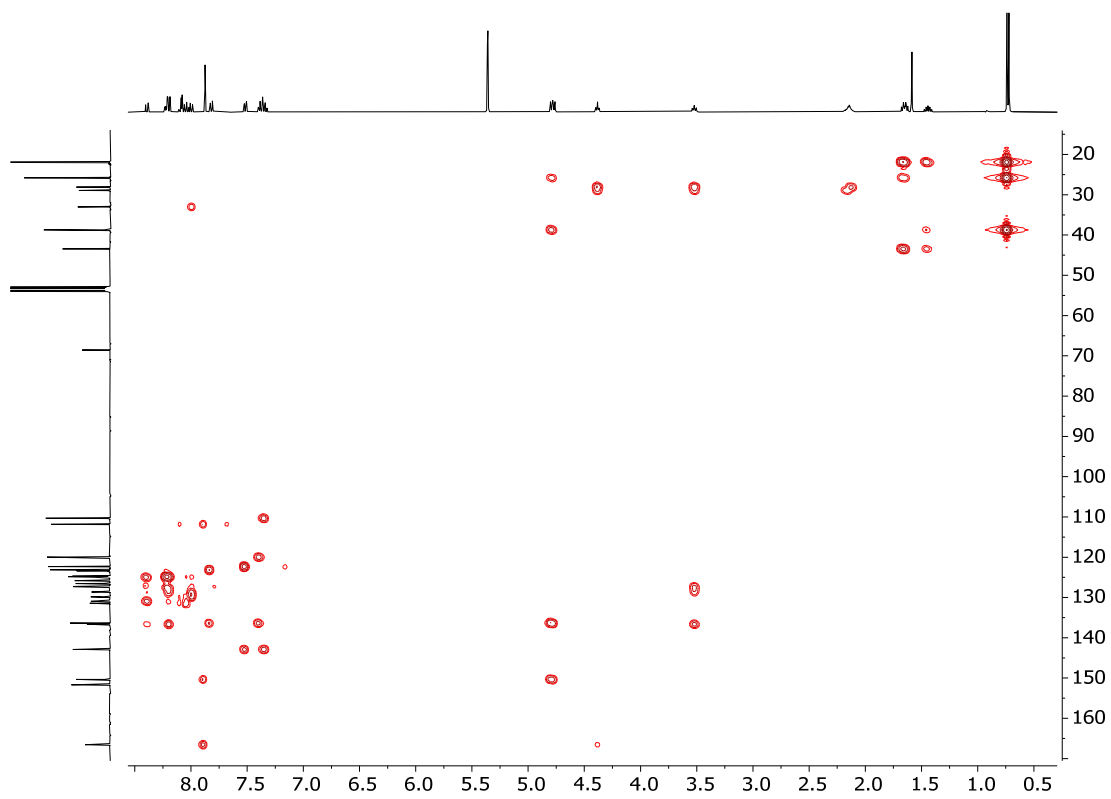

Figure A1-40. HMBC spectrum of L2 in CD<sub>2</sub>Cl<sub>2</sub>.

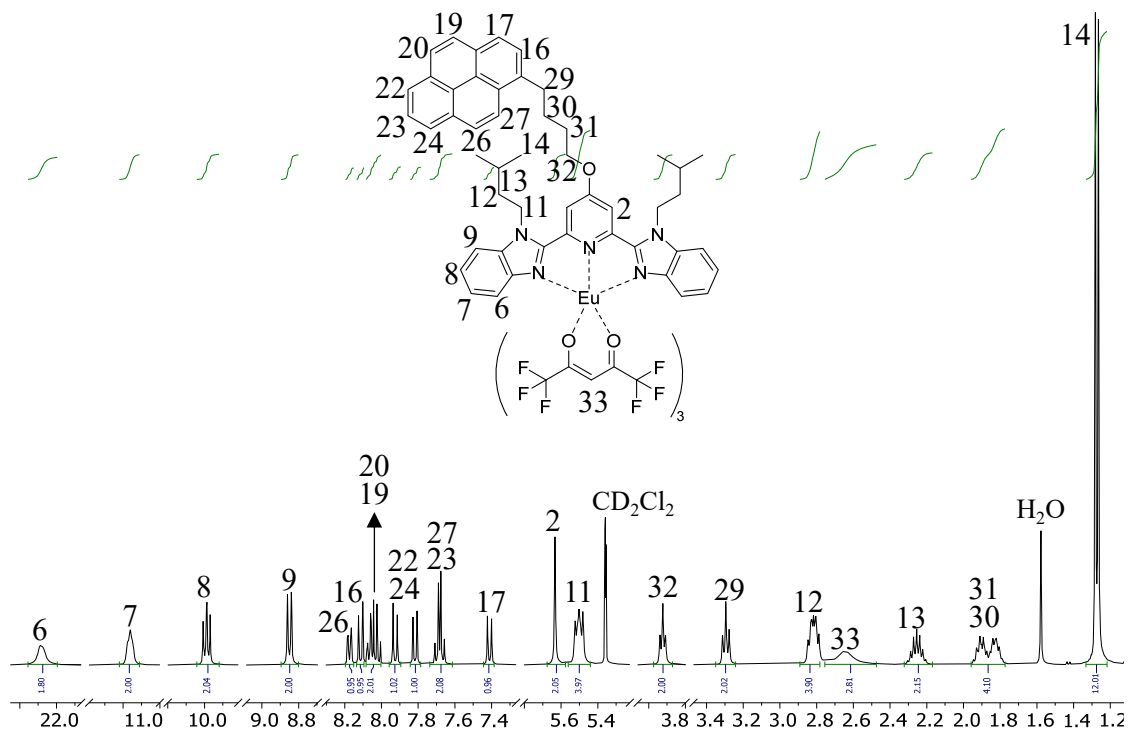

Figure A1-41.  $^1\text{H}$  NMR spectrum of  $[\text{L2Eu}(\text{hfac})_3]$  in  $\text{CD}_2\text{Cl}_2$ .

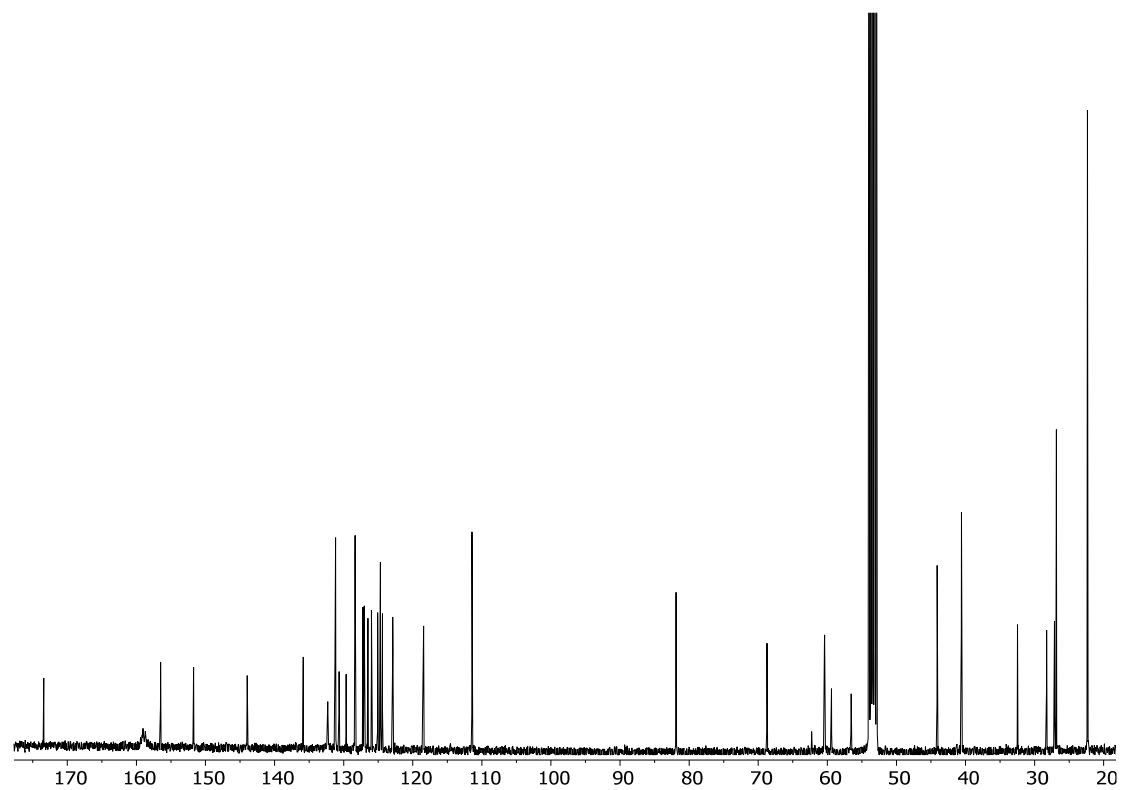

Figure A1-42.  $^{13}\text{C}$  NMR spectrum of  $[\text{L2Eu}(\text{hfac})_3]$  in  $\text{CD}_2\text{Cl}_2$ .

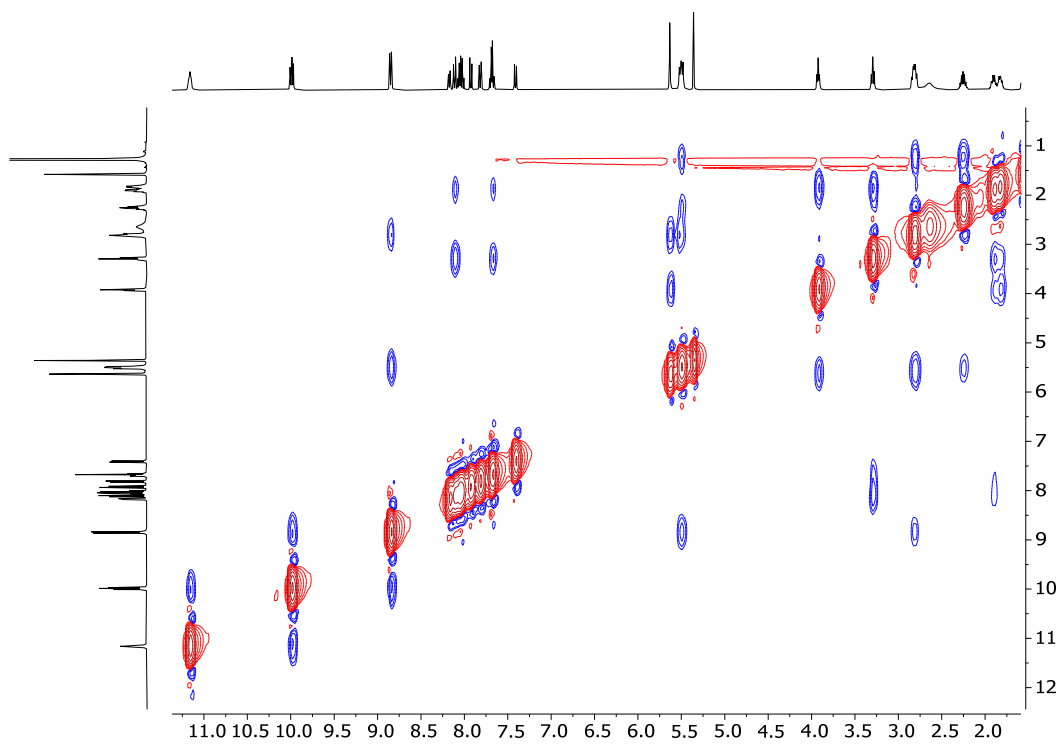

**Figure A1-43.** NOESY spectrum of  $[L2Eu(hfac)_3]$  in  $CD_2Cl_2$ .

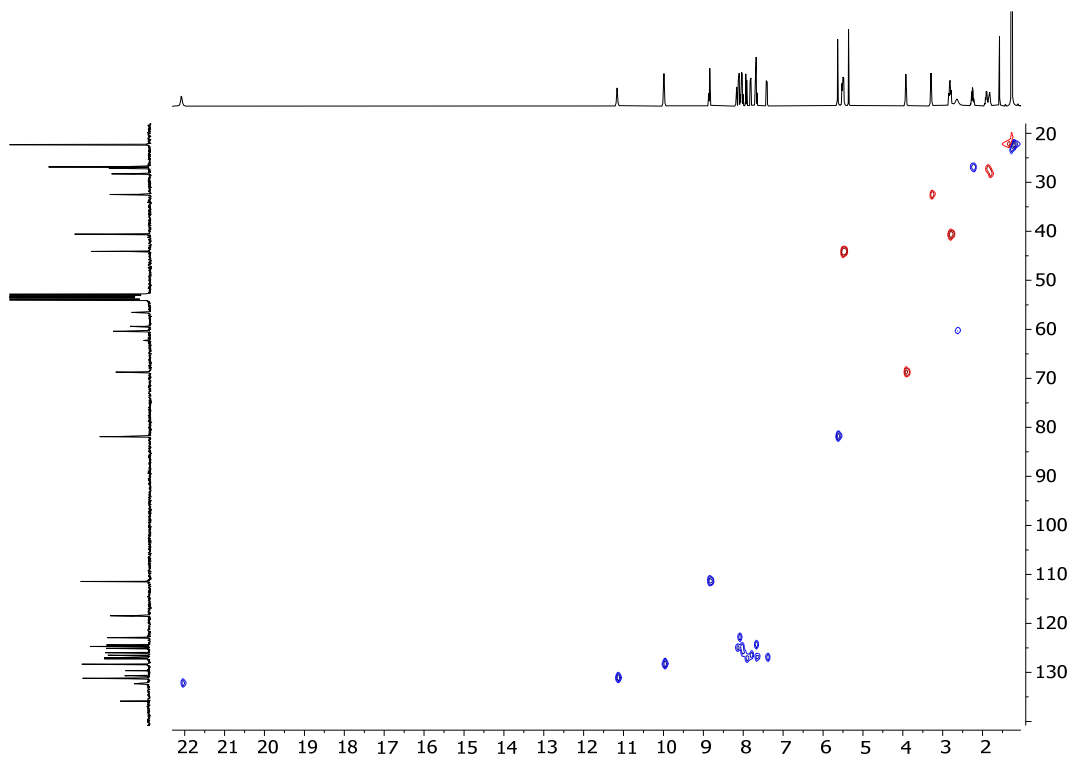

**Figure A1-44.** HSQC spectrum of  $[L2Eu(hfac)_3]$  in  $CD_2Cl_2$ .

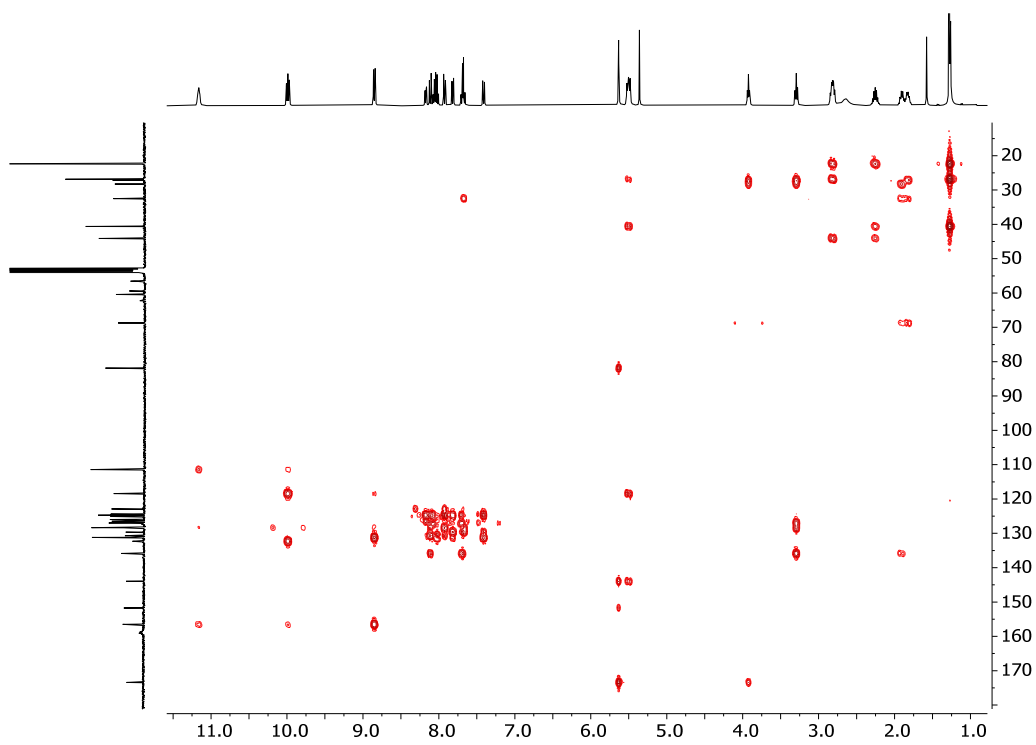

**Figure A1-45.** HMBC spectrum of [L2Eu(hfac)<sub>3</sub>] in CD<sub>2</sub>Cl<sub>2</sub>.

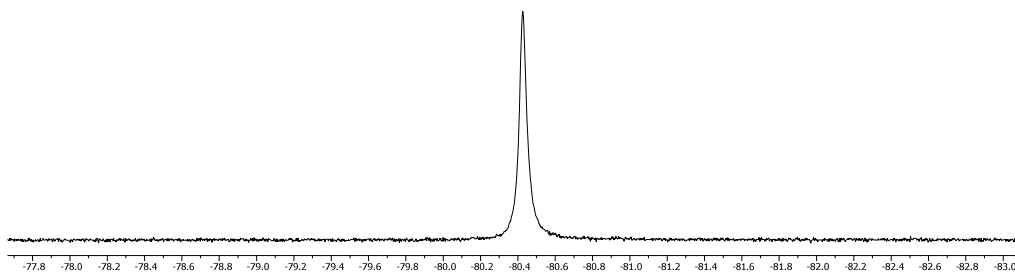

**Figure A1-46.** <sup>19</sup>F NMR spectrum of [L2Eu(hfac)<sub>3</sub>] in CD<sub>2</sub>Cl<sub>2</sub>.

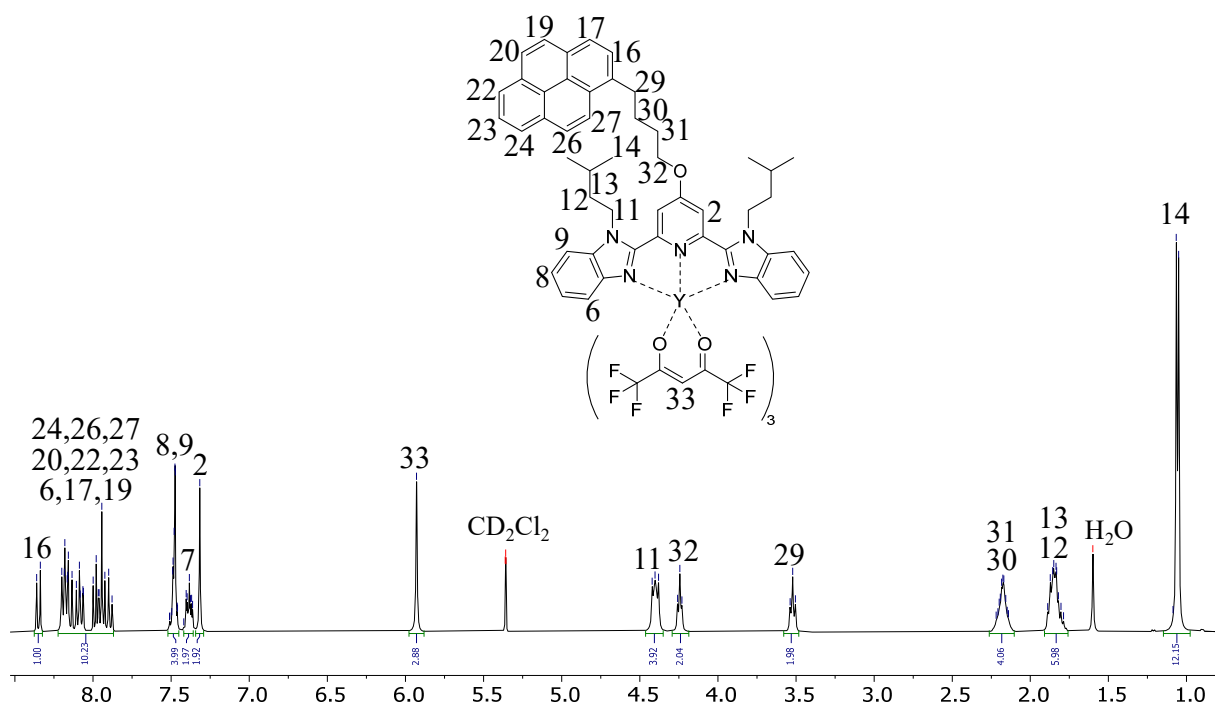

Figure A1-47.  $^1\text{H}$  NMR spectrum of  $[\text{L2Y}(\text{hfac})_3]$  in  $\text{CD}_2\text{Cl}_2$ .

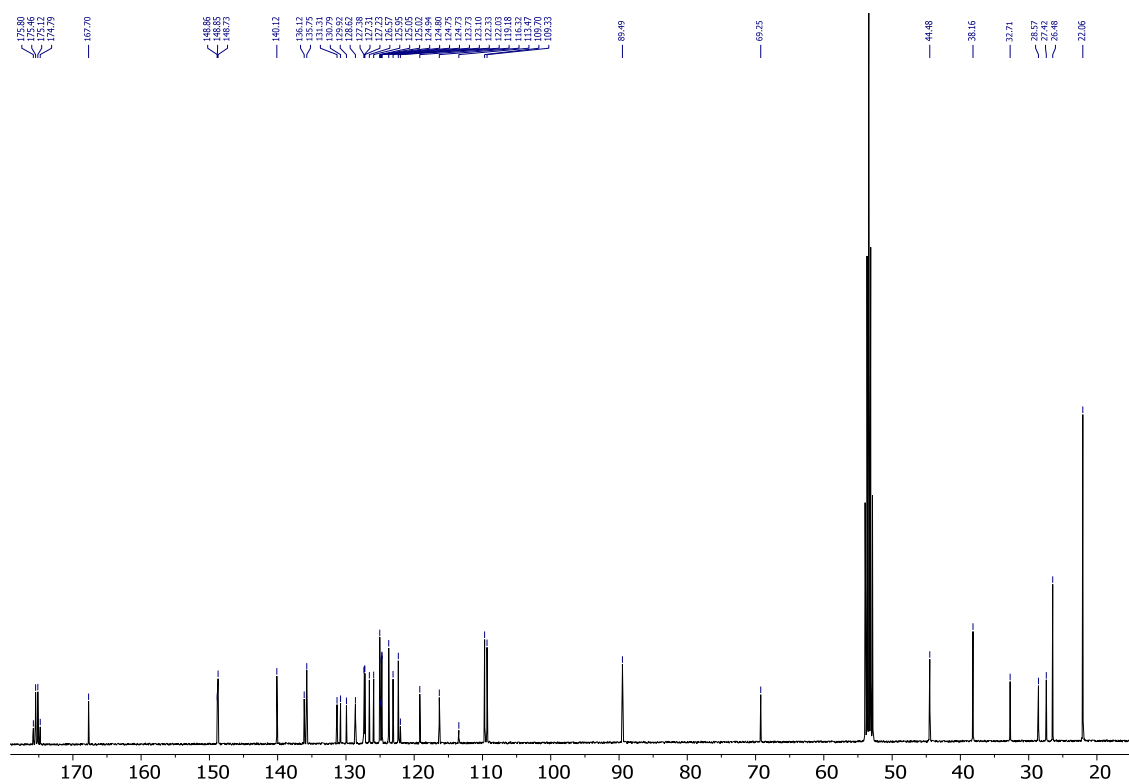

Figure A1-48.  $^{13}\text{C}$  NMR spectrum of  $[\text{L2Y}(\text{hfac})_3]$  in  $\text{CD}_2\text{Cl}_2$ .

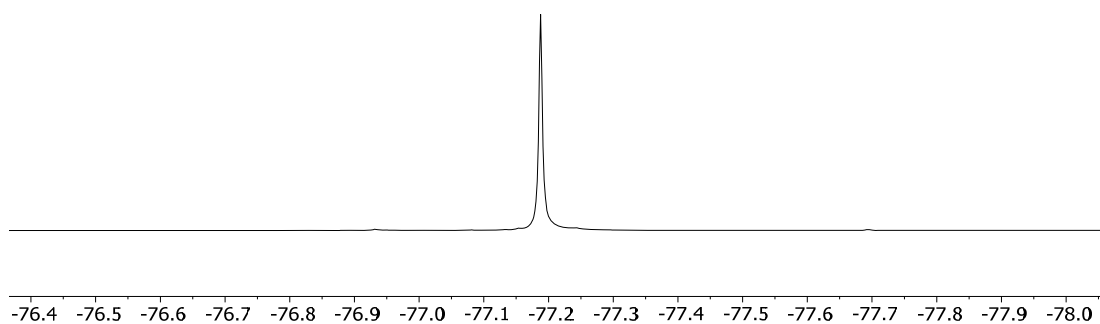

Figure A1-49.  $^{19}\text{F}$  NMR spectrum of  $[\text{L2Y}(\text{hfac})_3]$  in  $\text{CD}_2\text{Cl}_2$ .

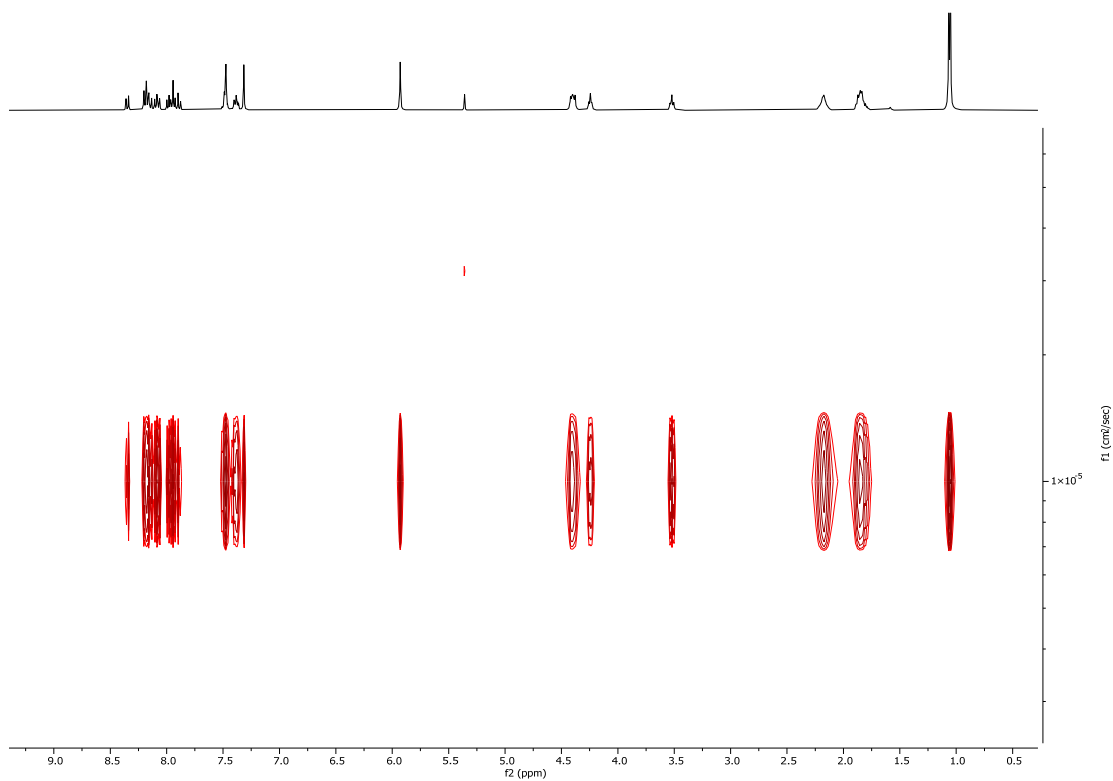

Figure A1-50. DOSY spectrum of  $[\text{L2Y}(\text{hfac})_3]$  in  $\text{CD}_2\text{Cl}_2$ .

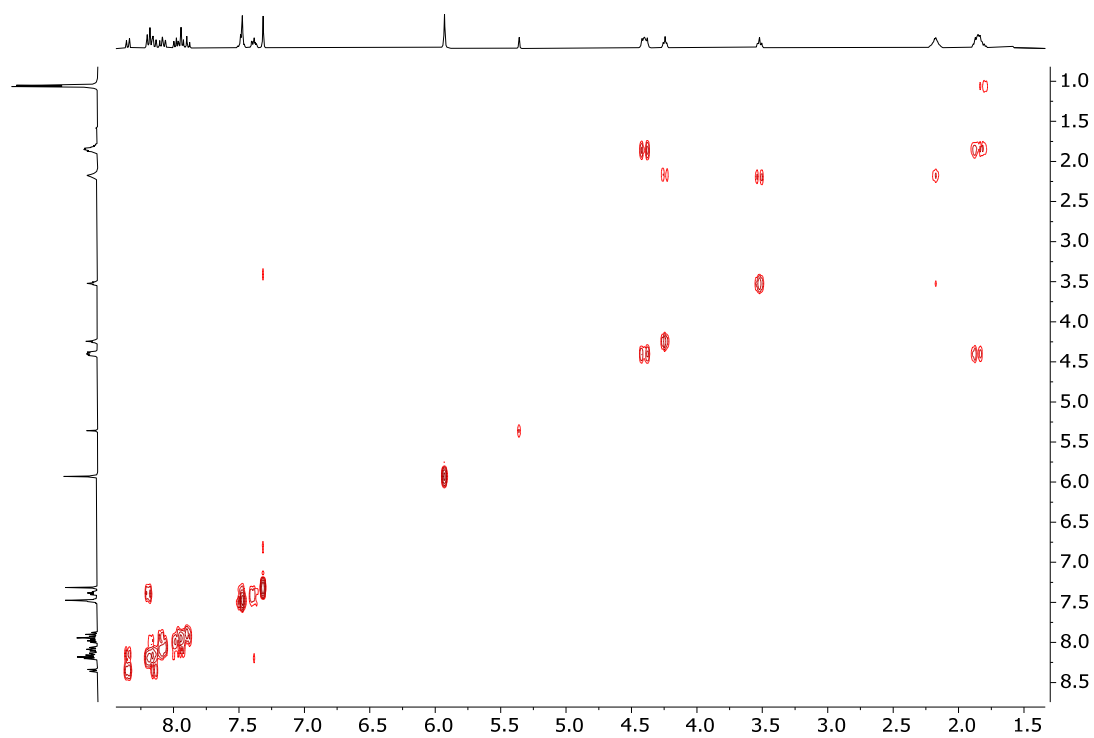

**Figure A1-51.** COSY spectrum of [L2Y(hfac)<sub>3</sub>] in CD<sub>2</sub>Cl<sub>2</sub>.

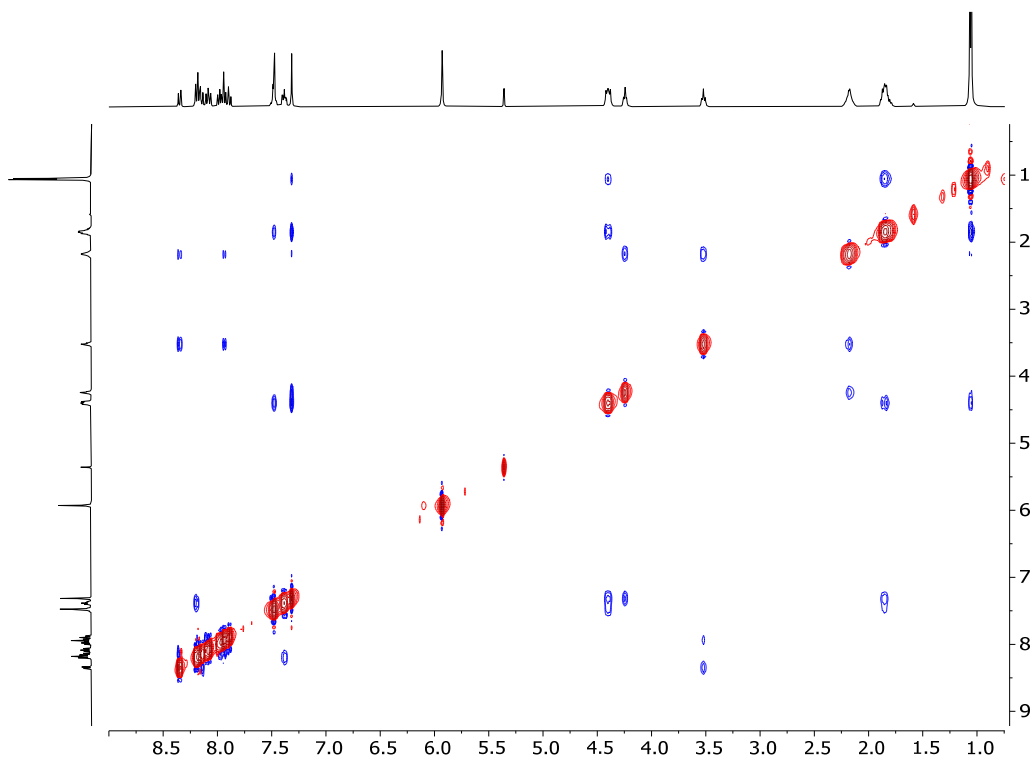

**Figure A1-52.** NOESY spectrum of [L2Y(hfac)<sub>3</sub>] in CD<sub>2</sub>Cl<sub>2</sub>.

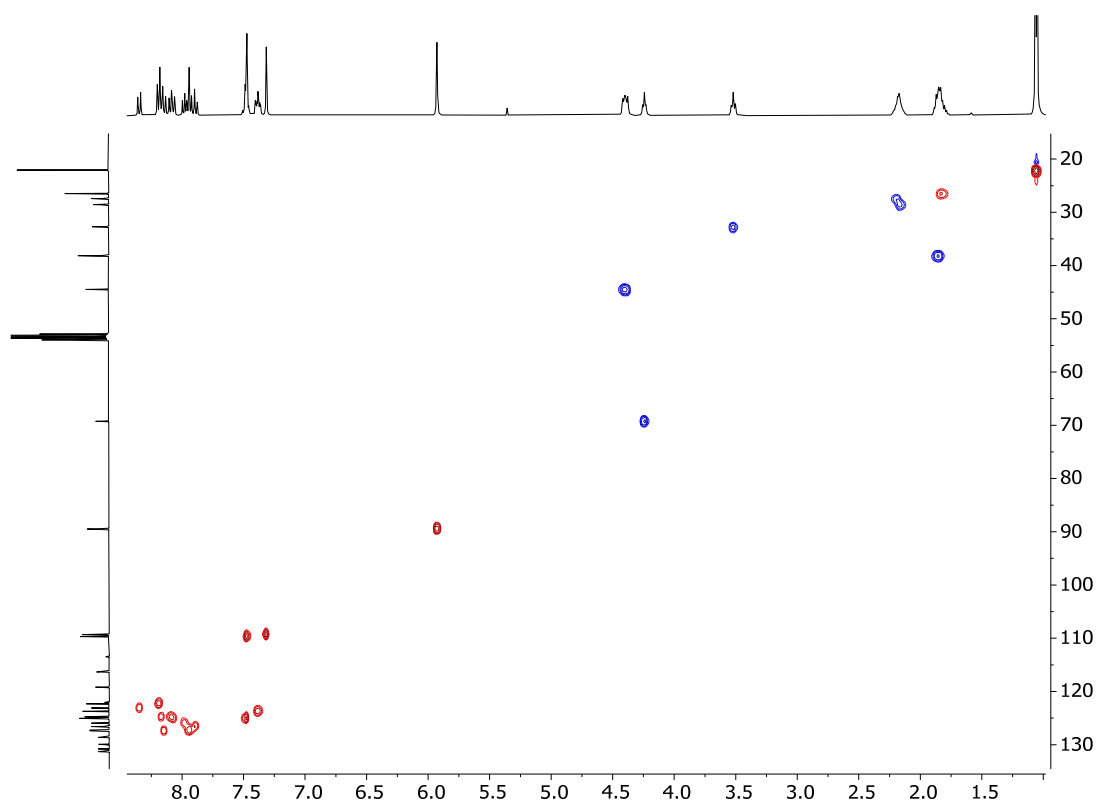

**Figure A1-53.** HSQC spectrum of [L2Y(hfac)<sub>3</sub>] in CD<sub>2</sub>Cl<sub>2</sub>.

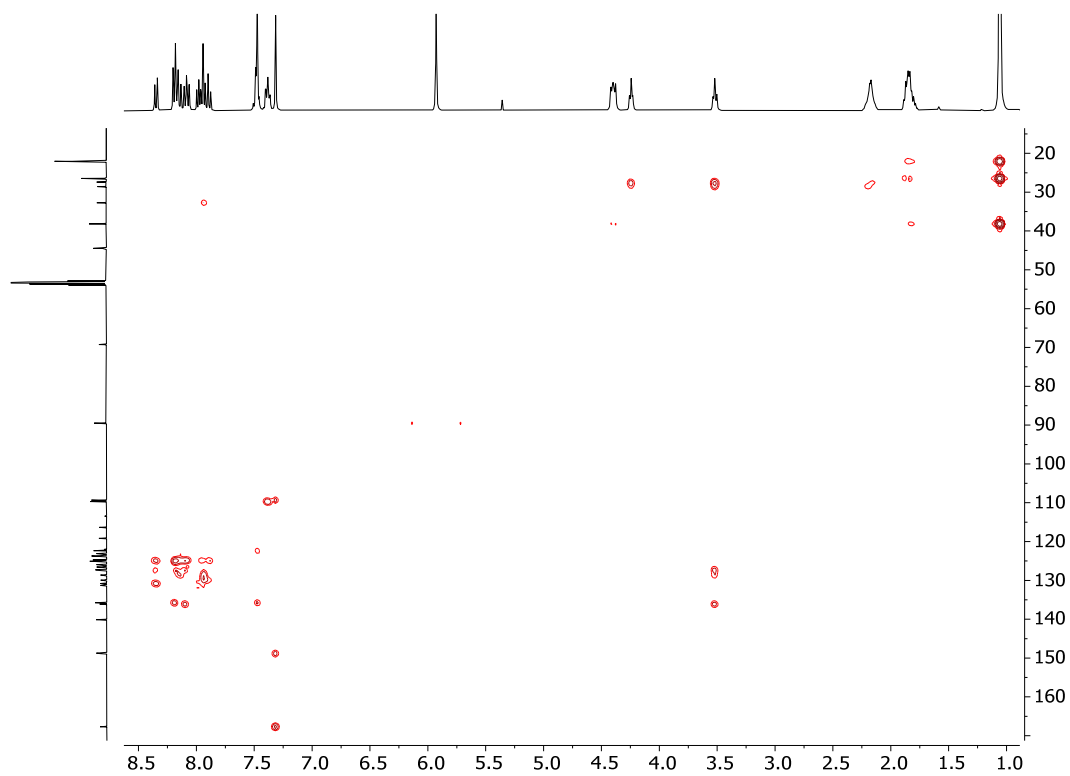

**Figure A1-54.** HMBC spectrum of [L2Y(hfac)<sub>3</sub>] in CD<sub>2</sub>Cl<sub>2</sub>.

## References

- (A1-1) A. Zaïm, H. Nozary, L. Guénée, C. Besnard, J.-F. Lemonnier, S. Petoud, C. Piguet, *Chem. Eur. J.* **2012**, *18*, 7155-7168. DOI: 10.1002/chem.201102827.
- (A1-2) G. Zaragoza-Galán, M. A. Fowler, J. Duhamel, R. Rein, N. Solladié, E. Rivera, *Langmuir*, **2012**, *28*, 11195-11205. DOI: 10.1021/la301284v.
- (A1-3) P. Froidevaux, J. M. Harrowfield, A. N. Sobolev, *Inorg. Chem.* **2000**, *39*, 4678. DOI: 10.1021/ic000353z.
- (A1-4) G. Le-Hoang, L. Guénée, M. Bertrand-Avebe, L. Babel, A. Rosspeintner, C. Piguet, *Inorg. Chem.* **2025**, *64*, 3941–3958. DOI: 10.1021/acs.inorgchem.4c05202.
- (A1-5) G. Malandrino, M. Bettinelli, A. Speghini, I. L. Fragalà, *Eur. J. Inorg. Chem.* **2001**, *4*, 1039-1044. DOI: 10.1002/1099-0682(200104)2001:4<1039::AID-EJIC1039>3.0.CO;2-2
- (A1-6) G. Malandrino, R. Nigro, I. L. Fragalà, C. Benelli, *Eur. J. Inorg. Chem.* **2004**, *3*, 500-509. DOI: 10.1002/ejic.200300354.

## Appendix 2: Crystal structures analysis of ligands and lanthanide complexes

Crystals were mounted on Hampton cryoloops with protection oil. X-ray data collections were performed with a XtaLAB Synergy-S diffractometer equipped with a hybrid pixel array “hypix arc 150” detector (Cu[K $\alpha$ ] radiation).

The structures were solved by using dual-space methods (ShelXT)<sup>A2-1</sup>. Full-matrix least-square refinements on  $F^2$  were performed with SHELXL<sup>A2-1, A2-2</sup> and all other calculations were performed with OLEX2<sup>A2-3</sup> and ORTEP<sup>A2-4</sup> programs.

CCDC 2531606-2531611 contain the supplementary crystallographic data for this paper. These data can be obtained free of charge from The Cambridge Crystallographic Data Centre via [www.ccdc.cam.ac.uk/data\\_request/cif](http://www.ccdc.cam.ac.uk/data_request/cif).

### Comments on crystal structures:

#### [L1Eu(hfac)<sub>3</sub>]:

A hexane solvent molecule is highly disordered in cavities, giving only weak peaks in the electronic density map. Squeeze bypass method was used to refine the solvent free structure. A solvent mask was calculated, and 288 electrons were found in a volume of 960Å<sup>3</sup> in 1 void per unit cell. This is consistent with the presence of 1.5[C<sub>6</sub>H<sub>14</sub>] per formula unit which accounts for 300 electrons per unit cell.

#### [L1Y(hfac)<sub>3</sub>]:

Solvent molecules (hexane) in cavities were too disordered to be modelled correctly, and "squeeze" bypass program as implemented in Olex2 software was used during the refinement of the solvent-free structure. A solvent mask was calculated, and 440 electrons were found in a volume of 1900Å<sup>3</sup> in 1 void per unit cell. This is consistent with the presence of 2.25[C<sub>6</sub>H<sub>14</sub>] per formula unit which accounts for 450 electrons per unit cell.

### References

- (A2-1) G. M. Sheldrick, *Acta Crystallogr. C: Structural Chemistry* **2015**, *71*, 3-8.
- (A2-2) G. M. Sheldrick, *Acta Crystallogr. A* **2008**, *64*, 112-122.
- (A2-3) O. V. Dolomanov, L. J. Bourhis, R. J. Gildea, J. A. K. Howard, H. Puschmann, *J. Appl. Crystallogr.* **2009**, *42*, 339-341.
- (A2-4) L. Farrugia, *J. Appl. Crystallogr.* **1997**, *30*, 565.

**Table A2-1.** Summary of crystal data, intensity measurements and structure refinements for **L1**.

|                                   |                                                                                                             |
|-----------------------------------|-------------------------------------------------------------------------------------------------------------|
| CCDC number                       | 2531606                                                                                                     |
| Empirical formula                 | C <sub>67</sub> H <sub>61</sub> N <sub>5</sub>                                                              |
| Chemical formula moiety           | C <sub>67</sub> H <sub>61</sub> N <sub>5</sub>                                                              |
| Formula weight                    | 936.20                                                                                                      |
| Temperature                       | 120.00(10) K                                                                                                |
| Wavelength                        | 1.54184 Å                                                                                                   |
| Crystal system                    | Monoclinic                                                                                                  |
| Space group                       | P 2 <sub>1</sub> /c                                                                                         |
| Unit cell dimensions              | a = 26.0953(2) Å      α = 90°.<br>b = 12.63448(11) Å    β = 103.8568(9)°.<br>c = 16.11327(12) Å    γ = 90°. |
| Volume                            | 5157.94(8) Å <sup>3</sup>                                                                                   |
| Z                                 | 4                                                                                                           |
| Density (calculated)              | 1.206 Mg/m <sup>3</sup>                                                                                     |
| Absorption coefficient            | 0.537 mm <sup>-1</sup>                                                                                      |
| F(000)                            | 1992                                                                                                        |
| Crystal size                      | 0.36 x 0.23 x 0.07 mm <sup>3</sup>                                                                          |
| Theta range for data collection   | 3.489 to 74.250°.                                                                                           |
| Index ranges                      | -31<=h<=32, -15<=k<=15, -16<=l<=20                                                                          |
| Reflections collected             | 53092                                                                                                       |
| Independent reflections           | 10382 [R(int) = 0.0380]                                                                                     |
| Completeness to theta = 67.684°   | 99.9 %                                                                                                      |
| Absorption correction             | Analytical                                                                                                  |
| Max. and min. transmission        | 0.967 and 0.877                                                                                             |
| Refinement method                 | Full-matrix least-squares on F <sup>2</sup>                                                                 |
| Data / restraints / parameters    | 10382 / 0 / 653                                                                                             |
| Goodness-of-fit on F <sup>2</sup> | 1.057                                                                                                       |
| Final R indices [I>2sigma(I)]     | R1 = 0.0484, wR2 = 0.1275                                                                                   |
| R indices (all data)              | R1 = 0.0544, wR2 = 0.1312                                                                                   |
| Extinction coefficient            | n/a                                                                                                         |
| Largest diff. peak and hole       | 0.484 and -0.215 e.Å <sup>-3</sup>                                                                          |

**Table A2-2.** Selected least-squares planes data of **L1**.

|                                                        | Abbreviation | RMSD (Å) | Max deviation (Å)<br>(Atom) |
|--------------------------------------------------------|--------------|----------|-----------------------------|
| Benzimidazole (1)<br>N1 C7 N2 C6 C1 C3 C2 C4 C5        | Bz1          | 0.006    | C7 (0.012)                  |
| Benzimidazole (2)<br>C37 N4 C38 C39 C40 C41 C42 C43 N5 | Bz2          | 0.009    | N5 (0.015)                  |
| Pyridine<br>N3 C36 C35 C34 C33 C32                     | Py           | 0.010    | C32 (0.014)                 |

**Table A2-3.** Interplanar angles (°) for **L1**.

| Plane             | Benzimidazole (1) | Benzimidazole (2) |
|-------------------|-------------------|-------------------|
| Pyridine          | 7.23(4)           | 49.20(5)          |
| Benzimidazole (1) |                   | 55.77(4)          |

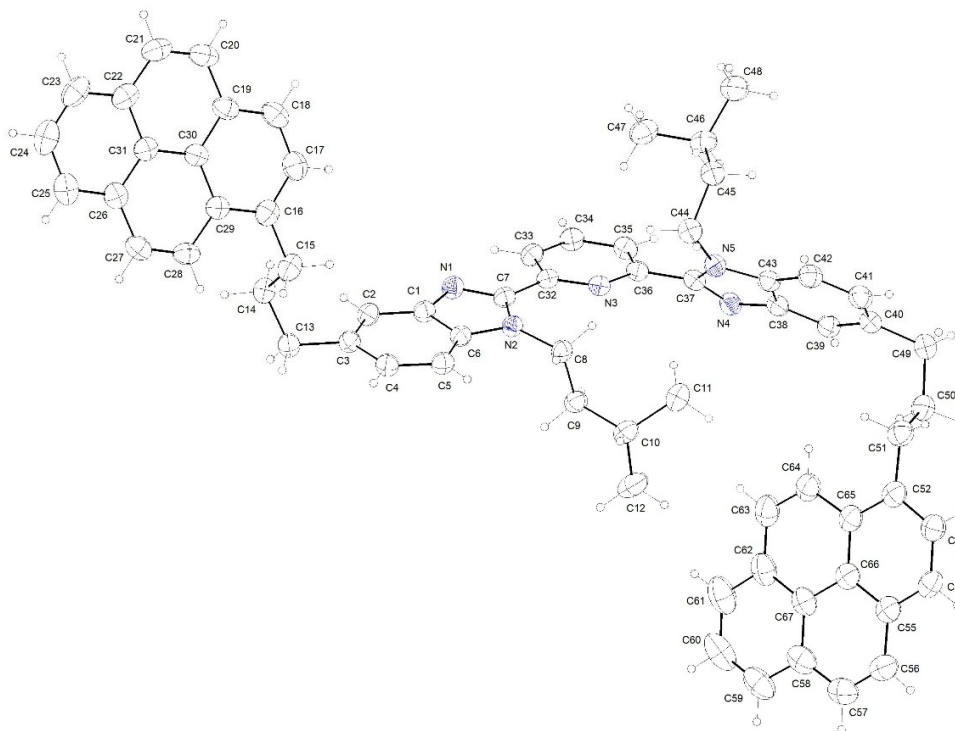**Figure A2-1.** Ortep view of **L1** (thermal ellipsoids are drawn at 50% probability) with numbering scheme.

**Table A2-4.** Summary of crystal data, intensity measurements and structure refinements for **L2**.

|                                   |                                                                                                                |
|-----------------------------------|----------------------------------------------------------------------------------------------------------------|
| CCDC number                       | 2531607                                                                                                        |
| Empirical formula                 | C <sub>49</sub> H <sub>49</sub> N <sub>5</sub> O                                                               |
| Chemical formula moiety           | C <sub>49</sub> H <sub>49</sub> N <sub>5</sub> O                                                               |
| Formula weight                    | 723.93                                                                                                         |
| Temperature                       | 120.00(10) K                                                                                                   |
| Wavelength                        | 1.54184 Å                                                                                                      |
| Crystal system                    | Monoclinic                                                                                                     |
| Space group                       | P 2 <sub>1</sub> /n                                                                                            |
| Unit cell dimensions              | a = 19.71021(19) Å      α = 90°.<br>b = 17.83878(16) Å      β = 94.1684(8)°.<br>c = 22.5695(2) Å      γ = 90°. |
| Volume                            | 7914.58(13) Å <sup>3</sup>                                                                                     |
| Z (Z')                            | 8 (2)                                                                                                          |
| Density (calculated)              | 1.215 Mg/m <sup>3</sup>                                                                                        |
| Absorption coefficient            | 0.567 mm <sup>-1</sup>                                                                                         |
| F(000)                            | 3088                                                                                                           |
| Crystal size                      | 0.21 x 0.1 x 0.04 mm <sup>3</sup>                                                                              |
| Theta range for data collection   | 2.875 to 74.289°.                                                                                              |
| Index ranges                      | -24 ≤ h ≤ 24, -20 ≤ k ≤ 22, -26 ≤ l ≤ 28                                                                       |
| Reflections collected             | 76881                                                                                                          |
| Independent reflections           | 15921 [R(int) = 0.0254]                                                                                        |
| Completeness to theta = 67.684°   | 99.9 %                                                                                                         |
| Absorption correction             | Analytical                                                                                                     |
| Max. and min. transmission        | 0.983 and 0.911                                                                                                |
| Refinement method                 | Full-matrix least-squares on F <sup>2</sup>                                                                    |
| Data / restraints / parameters    | 15921 / 0 / 999                                                                                                |
| Goodness-of-fit on F <sup>2</sup> | 1.047                                                                                                          |
| Final R indices [I > 2σ(I)]       | R1 = 0.0466, wR2 = 0.1294                                                                                      |
| R indices (all data)              | R1 = 0.0584, wR2 = 0.1379                                                                                      |
| Extinction coefficient            | n/a                                                                                                            |
| Largest diff. peak and hole       | 0.457 and -0.224 e.Å <sup>-3</sup>                                                                             |

**Table A2-5.** Selected least-squares planes data of **L2**.

|                                                                                       | Abbreviation | RMSD (Å) | Max deviation (Å)<br>(Atom) |
|---------------------------------------------------------------------------------------|--------------|----------|-----------------------------|
| Benzimidazole (1)                                                                     |              |          |                             |
| C7B N2B C6B C5B C4B C3B C2B C1B<br>N1B                                                | Bz1          | 0.011    | N2B (0.021)                 |
| Benzimidazole (2)                                                                     |              |          |                             |
| C18B N4B C19B C20B C21B C22B C23B<br>C24B N5B                                         | Bz2          | 0.010    | N5B (0.015)                 |
| Pyridine                                                                              |              |          |                             |
| N3B C17B C16B C15B C14B C13B                                                          | Py           | 0.011    | C16B (0.016)                |
| Pyrene                                                                                |              |          |                             |
| C34B C35B C36B C37B C38B C39B C40B<br>C49B C44B C43B C42B C41B C45B C46B<br>C47B C48B | Pr           | 0.036    | C45B (0.066)                |

**Table A2-6.** Interplanar angles (°) for **L2**.

| Plane             | Benzimidazole (1) | Benzimidazole (2) |
|-------------------|-------------------|-------------------|
| Pyridine          | 11.98(4)          | 25.95(4)          |
| Benzimidazole (1) |                   | 34.76(4)          |

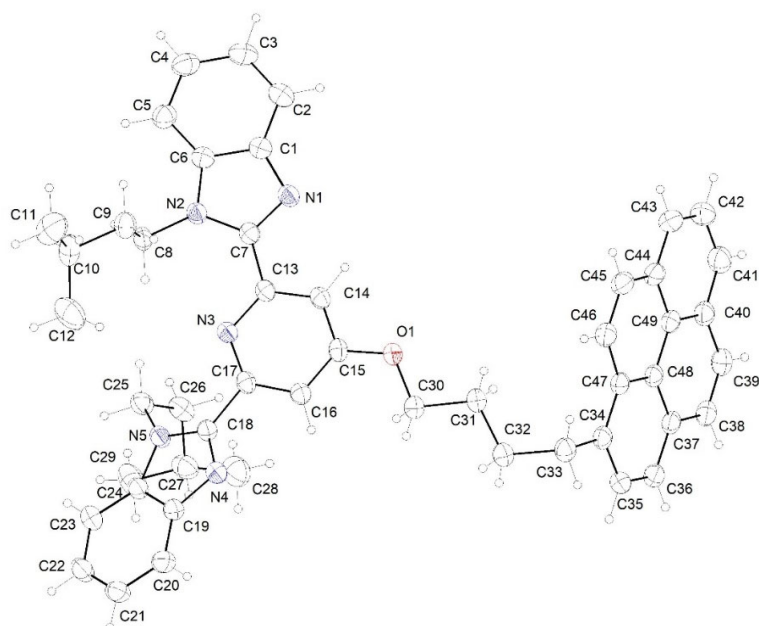

**Figure A2-2.** Ortep view of molecule A in L2 (thermal ellipsoids are drawn at 50% probability) with numbering scheme.

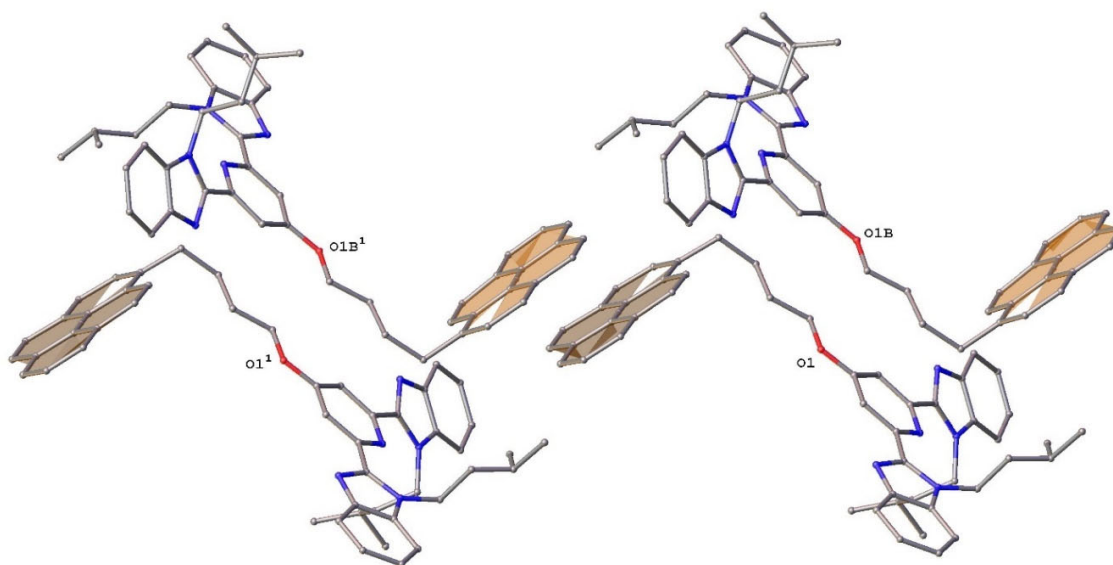

**Figure A2-3.** Planes and  $\pi$ -stacking analysis in L2. Sym. op. 1 ( $x, -1+y, z$ ).

Intermolecular stacking:

**Pr (brown) – PrB<sup>1</sup> (brown):**

Angle between planes =  $3.47^\circ$

Distance Pr to Pr' centroid = 3.35 Å

**Table A2-7.** Summary of crystal data, intensity measurements and structure refinements for [L2Eu(hfac)<sub>3</sub>].

|                                   |                                                                                                                |
|-----------------------------------|----------------------------------------------------------------------------------------------------------------|
| CCDC number                       | 2531608                                                                                                        |
| Empirical formula                 | C <sub>64</sub> H <sub>52</sub> F <sub>18</sub> N <sub>6</sub> O <sub>7</sub> Eu                               |
| Chemical formula moiety           | C <sub>64</sub> H <sub>52</sub> F <sub>18</sub> N <sub>6</sub> O <sub>7</sub> Eu                               |
| Formula weight                    | 1497.06                                                                                                        |
| Temperature                       | 120.00(11) K                                                                                                   |
| Wavelength                        | 1.54184 Å                                                                                                      |
| Crystal system                    | Monoclinic                                                                                                     |
| Space group                       | P 2 <sub>1</sub> /c                                                                                            |
| Unit cell dimensions              | a = 22.92754(11) Å      α = 90°.<br>b = 16.67760(8) Å      β = 97.6632(4)°.<br>c = 16.28183(7) Å      γ = 90°. |
| Volume                            | 6170.18(5) Å <sup>3</sup>                                                                                      |
| Z                                 | 4                                                                                                              |
| Density (calculated)              | 1.612 Mg/m <sup>3</sup>                                                                                        |
| Absorption coefficient            | 8.281 mm <sup>-1</sup>                                                                                         |
| F(000)                            | 3008                                                                                                           |
| Crystal size                      | 0.74 x 0.06 x 0.03 mm <sup>3</sup>                                                                             |
| Theta range for data collection   | 3.287 to 76.000°.                                                                                              |
| Index ranges                      | -28 ≤ h ≤ 28, -20 ≤ k ≤ 20, -20 ≤ l ≤ 13                                                                       |
| Reflections collected             | 112105                                                                                                         |
| Independent reflections           | 12629 [R(int) = 0.0360]                                                                                        |
| Completeness to theta = 67.684°   | 100.0 %                                                                                                        |
| Absorption correction             | Analytical                                                                                                     |
| Max. and min. transmission        | 0.788 and 0.140                                                                                                |
| Refinement method                 | Full-matrix least-squares on F <sup>2</sup>                                                                    |
| Data / restraints / parameters    | 12629 / 30 / 918                                                                                               |
| Goodness-of-fit on F <sup>2</sup> | 1.043                                                                                                          |
| Final R indices [I > 2σ(I)]       | R1 = 0.0436, wR2 = 0.1068                                                                                      |
| R indices (all data)              | R1 = 0.0486, wR2 = 0.1096                                                                                      |
| Extinction coefficient            | n/a                                                                                                            |
| Largest diff. peak and hole       | 1.110 and -0.650 e.Å <sup>-3</sup>                                                                             |

**Table A2-8.** Selected least-squares planes data of [L2Eu(hfac)<sub>3</sub>].

|                                                                              | Abbreviation | RMSD (Å) | Max deviation (Å)<br>(Atom) |
|------------------------------------------------------------------------------|--------------|----------|-----------------------------|
| Benzimidazole (1)<br>N1 C7 N2 C6 C1 C2 C3 C4 C5                              | Bz1          | 0.005    | C5 (0.009)                  |
| Benzimidazole (2)<br>N4 C18 N5 C24 C19 C20 C21 C22 C23                       | Bz2          | 0.018    | C18 (0.026)                 |
| Pyridine<br>N3 C17 C16 C15 C14 C13                                           | Py           | 0.005    | C13 (0.009)                 |
| Pyrene<br>C36 C35 C34 C47 C48 C37 C38 C39 C40<br>C41 C42 C43 C44 C49 C45 C46 | Pr           | 0.031    | C34 (0.068)                 |

**Table A2-9.** Interplanar angles (°) for [L2Eu(hfac)<sub>3</sub>].

| Plane             | Benzimidazole (1) | Benzimidazole (2) | Hfac1     | Hfac2     | Hfac3     |
|-------------------|-------------------|-------------------|-----------|-----------|-----------|
| Pyridine          | 29.1(1)           | 10.60(8)          | 54.49(12) | 26.52(9)  | 65.68(12) |
| Benzimidazole (1) |                   | 38.34(8)          | 70.74(11) | 20.15(10) | 36.90(12) |
| Benzimidazole (2) |                   |                   | 45.50(11) | 30.53(8)  | 73.89(10) |
| Hfac1             |                   |                   |           | 51.22(13) | 89.43(11) |
| Hfac2             |                   |                   |           |           | 45.99(13) |

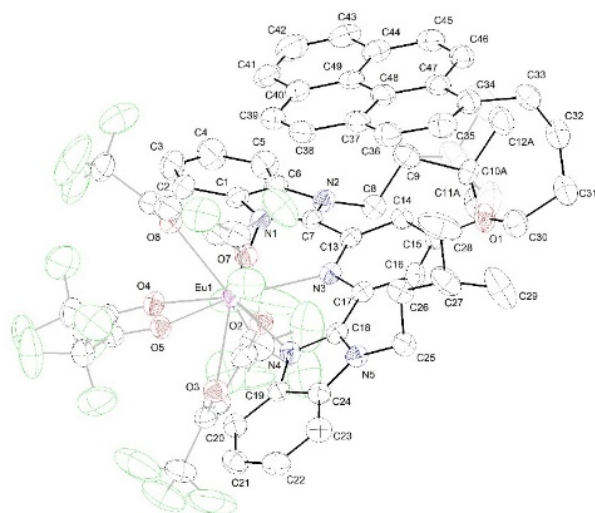

**Figure A2-4.** ORTEP view of [L2Eu(hfac)<sub>3</sub>] (thermal ellipsoids are drawn at 50% probability level) with numbering scheme.

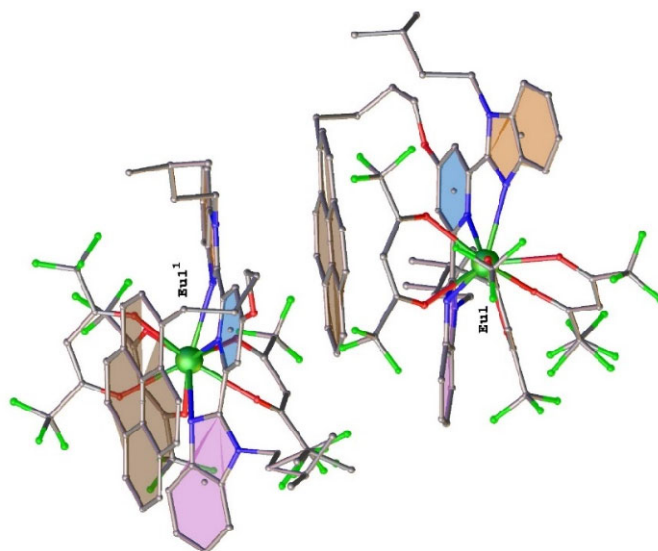

**Figure A2-5.** Planes and  $\pi$ - $\pi$  stacking in [L2Eu(hfac)<sub>3</sub>]. Sym. op. <sup>1</sup> ( $x, 3/2-y, 1/2+z$ ).

Intramolecular Pr(brown)- Py(blue):

Angle between planes = 13.91°

Distance Py to Pr centroid = 3.22 Å

Intramolecular Pr(brown)- Bz(pink):

Angle between planes = 17.58°

Distance Pr to Bz centroid = 3.17 Å

Intermolecular Pr(brown)- Py<sup>1</sup>(blue):

Angle between planes = 8.40°

Distance Py to Pr centroid = 3.24 Å

Intermolecular Pr(brown)- Bz<sup>1</sup>(orange):

Angle between planes = 5.15°

Distance Pr to Bz centroid = 3.22 Å

**Table A2-10.** Summary of crystal data, intensity measurements and structure refinements for complex [L2Y(hfac)<sub>3</sub>].

|                                   |                                                                                                               |
|-----------------------------------|---------------------------------------------------------------------------------------------------------------|
| CCDC number                       | 2531609                                                                                                       |
| Empirical formula                 | C <sub>64</sub> H <sub>52</sub> N <sub>5</sub> O <sub>7</sub> F <sub>18</sub> Y                               |
| Chemical formula moiety           | C <sub>64</sub> H <sub>52</sub> N <sub>5</sub> O <sub>7</sub> F <sub>18</sub> Y                               |
| Formula weight                    | 1433.01                                                                                                       |
| Temperature                       | 119.99(10) K                                                                                                  |
| Wavelength                        | 1.54184 Å                                                                                                     |
| Crystal system                    | Monoclinic                                                                                                    |
| Space group                       | P 2 <sub>1</sub> /c                                                                                           |
| Unit cell dimensions              | a = 12.36202(19) Å      α = 90°.<br>b = 27.8313(4) Å      β = 91.0352(14)°.<br>c = 18.0883(2) Å      γ = 90°. |
| Volume                            | 6222.30(15) Å <sup>3</sup>                                                                                    |
| Z                                 | 4                                                                                                             |
| Density (calculated)              | 1.530 Mg/m <sup>3</sup>                                                                                       |
| Absorption coefficient            | 2.317 mm <sup>-1</sup>                                                                                        |
| F(000)                            | 2908                                                                                                          |
| Crystal size                      | 0.61 x 0.03 x 0.01 mm <sup>3</sup>                                                                            |
| Theta range for data collection   | 2.914 to 75.724°.                                                                                             |
| Index ranges                      | -15 ≤ h ≤ 15, -34 ≤ k ≤ 34, -13 ≤ l ≤ 22                                                                      |
| Reflections collected             | 59316                                                                                                         |
| Independent reflections           | 12529 [R(int) = 0.0368]                                                                                       |
| Completeness to theta = 67.684°   | 99.9 %                                                                                                        |
| Absorption correction             | Analytical                                                                                                    |
| Max. and min. transmission        | 0.971 and 0.533                                                                                               |
| Refinement method                 | Full-matrix least-squares on F <sup>2</sup>                                                                   |
| Data / restraints / parameters    | 12529 / 1 / 967                                                                                               |
| Goodness-of-fit on F <sup>2</sup> | 1.029                                                                                                         |
| Final R indices [I > 2σ(I)]       | R1 = 0.0582, wR2 = 0.1475                                                                                     |
| R indices (all data)              | R1 = 0.0753, wR2 = 0.1573                                                                                     |
| Extinction coefficient            | n/a                                                                                                           |
| Largest diff. peak and hole       | 1.175 and -0.493 e.Å <sup>-3</sup>                                                                            |

**Table A2-11.** Selected least-squares planes data of [L2Y(hfac)<sub>3</sub>].

|                                                                              | Abbreviation | RMSD (Å) | Max deviation (Å)<br>(Atom) |
|------------------------------------------------------------------------------|--------------|----------|-----------------------------|
| Benzimidazole (1)<br>N1 C7 N2 C6 C1 C2 C3 C4 C5                              | Bz1          | 0.025    | C7 (0.045)                  |
| Benzimidazole (2)<br>C18 N5 C24 C19 N4 C20 C21 C22 C23                       | Bz2          | 0.007    | N4 (0.013)                  |
| Pyridine<br>N3 C17 C16 C15 C14 C13                                           | Py           | 0.010    | C15 (0.014)                 |
| Pyrene<br>C34 C47 C46 C45 C48 C35 C36 C37 C38<br>C49 C42 C43 C44 C39 C40 C41 | Pr           | 0.021    | C34 (0.043)                 |

**Table A2-12.** Interplanar angles (°) for [L2Y(hfac)<sub>3</sub>].

| Plane             | Benzimidazole (1) | Benzimidazole (2) | Hfac1     | Hfac2     | Hfac3     |
|-------------------|-------------------|-------------------|-----------|-----------|-----------|
| Pyridine          | 6.12(13)          | 25.83(12)         | 61.02(15) | 32.45(12) | 72.45(15) |
| Benzimidazole (1) |                   | 23.29(10)         | 72.41(11) | 26.68(11) | 47.00(13) |
| Benzimidazole (2) |                   |                   | 57.28(15) | 26.35(10) | 68.64(13) |
| Hfac1             |                   |                   |           | 47.58(16) | 88.62(11) |
| Hfac2             |                   |                   |           |           | 52.54(16) |

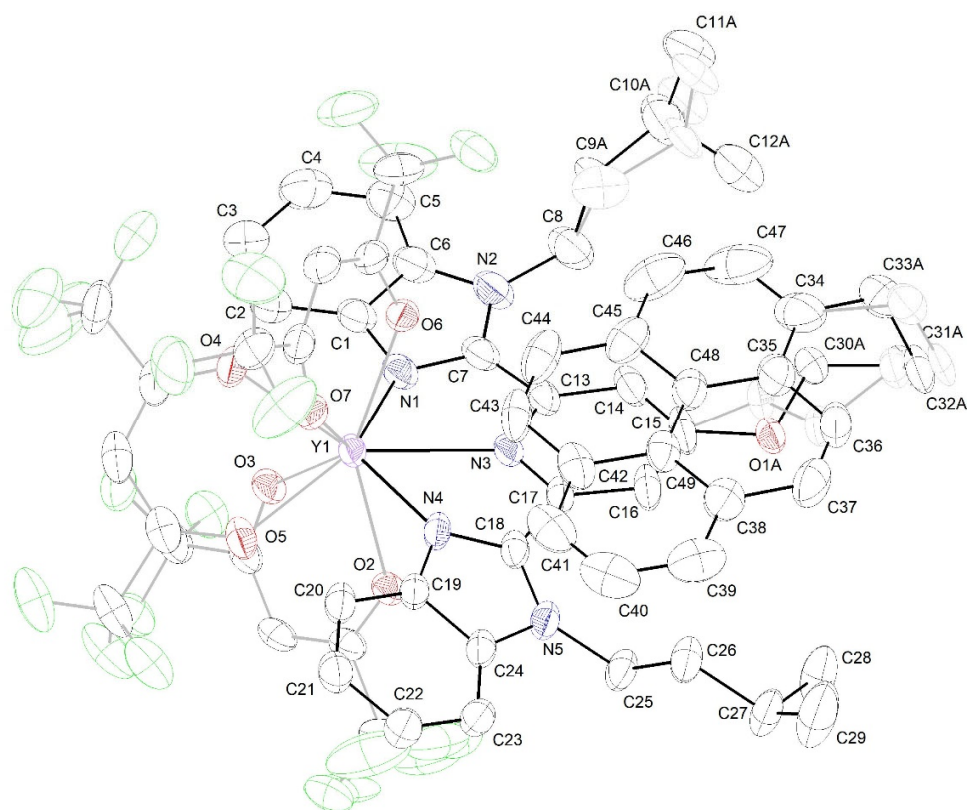

**Figure A2-6.** ORTEP view of [L2Y(hfac)<sub>3</sub>] (thermal ellipsoids are drawn at 50% probability level) with numbering scheme.

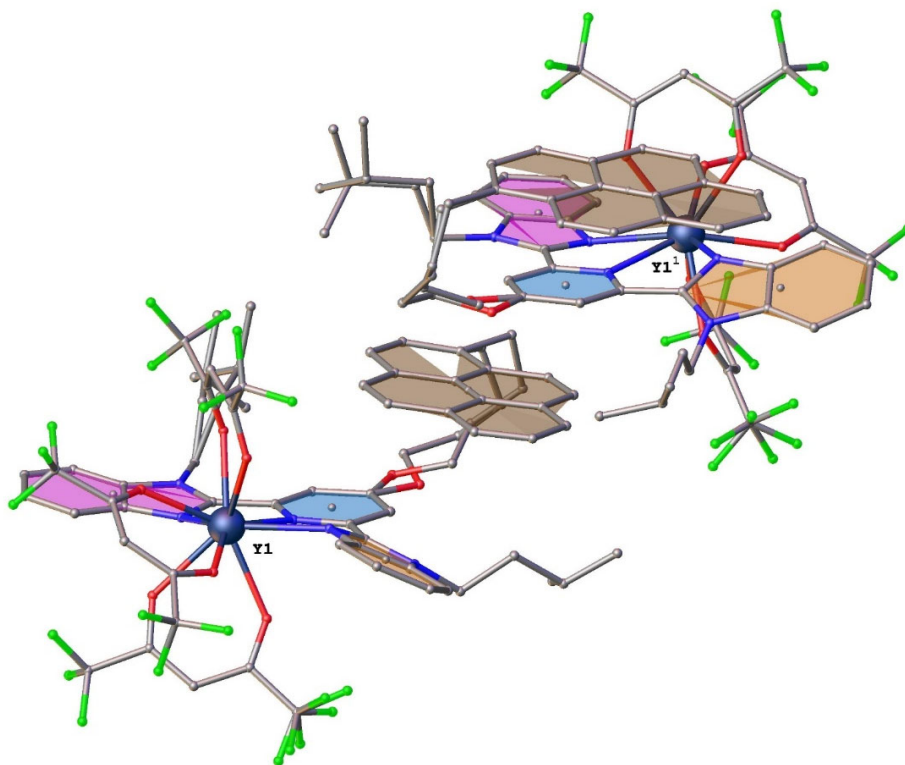

**Figure A2-7.** Planes and  $\pi$ - $\pi$  stacking in [L2Y(hfac)<sub>3</sub>]. Sym. Op. <sup>1</sup> ( $x, 1/2-y, -1/2+z$ ).

Intramolecular Pr(brown) - Py(blue):

Angle between planes = 5.84°

Distance Py to Pr centroid = 3.30 Å

Intramolecular Pr(brown) - Bz(pink):

Angle between planes = 20.87°

Distance Pr to Bz centroid = 3.18 Å

Intermolecular Pr(brown) – Py<sup>1</sup>(blue):

Angle between planes = 6.21°

Distance Py to Pr centroid = 3.26 Å

Intermolecular Pr(brown) – Bz<sup>1</sup>(orange):

Angle between planes = 5.02°

Distance Bz to Pr centroid = 3.26 Å

**Table A2-13.** Summary of crystal data, intensity measurements and structure refinements for [L1Eu(hfac)<sub>3</sub>] $\cdot$ 0.5CH<sub>2</sub>Cl<sub>2</sub> $\cdot$ 1.5C<sub>6</sub>H<sub>14</sub>.

|                                           |                                                                                                                                                                       |
|-------------------------------------------|-----------------------------------------------------------------------------------------------------------------------------------------------------------------------|
| CCDC number                               | 2531610                                                                                                                                                               |
| Empirical formula                         | C <sub>82</sub> H <sub>64</sub> N <sub>5</sub> O <sub>6</sub> F <sub>18</sub> Eu                                                                                      |
| Chemical formula moiety                   | C <sub>82</sub> H <sub>64</sub> N <sub>5</sub> O <sub>6</sub> F <sub>18</sub> Eu $\cdot$ 0.5CH <sub>2</sub> Cl <sub>2</sub> $\cdot$ 1.5C <sub>6</sub> H <sub>14</sub> |
| Formula weight                            | 1881.06                                                                                                                                                               |
| Temperature                               | 120.00(10) K                                                                                                                                                          |
| Wavelength                                | 1.54184 Å                                                                                                                                                             |
| Crystal system                            | Orthorhombic                                                                                                                                                          |
| Space group                               | <i>P b c n</i>                                                                                                                                                        |
| Unit cell dimensions                      | a = 20.09750(11) Å $\alpha = 90^\circ$ .<br>b = 14.10417(6) Å $\beta = 90^\circ$ .<br>c = 30.15350(18) Å $\gamma = 90^\circ$ .                                        |
| Volume                                    | 8547.27(8) Å <sup>3</sup>                                                                                                                                             |
| Z (Z')                                    | 4 (0.5)                                                                                                                                                               |
| Density (calculated)                      | 1.462 Mg/m <sup>3</sup>                                                                                                                                               |
| Absorption coefficient                    | 6.373 mm <sup>-1</sup>                                                                                                                                                |
| F(000)                                    | 3840                                                                                                                                                                  |
| Crystal size                              | 0.225 x 0.147 x 0.092 mm <sup>3</sup>                                                                                                                                 |
| Theta range for data collection           | 2.931 to 75.967°.                                                                                                                                                     |
| Index ranges                              | -24 $\leq$ h $\leq$ 24, -9 $\leq$ k $\leq$ 17, -37 $\leq$ l $\leq$ 35                                                                                                 |
| Reflections collected                     | 69809                                                                                                                                                                 |
| Independent reflections                   | 8753 [R(int) = 0.0236]                                                                                                                                                |
| Completeness to theta = 67.684°           | 99.9 %                                                                                                                                                                |
| Absorption correction                     | Analytical                                                                                                                                                            |
| Max. and min. transmission                | 0.609 and 0.372                                                                                                                                                       |
| Refinement method                         | Full-matrix least-squares on F <sup>2</sup>                                                                                                                           |
| Data / restraints / parameters            | 8753 / 2 / 521                                                                                                                                                        |
| Goodness-of-fit on F <sup>2</sup>         | 1.054                                                                                                                                                                 |
| Final R indices [I $\geq$ 2 $\sigma$ (I)] | R1 = 0.0636, wR2 = 0.1829                                                                                                                                             |
| R indices (all data)                      | R1 = 0.0677, wR2 = 0.1869                                                                                                                                             |
| Extinction coefficient                    | n/a                                                                                                                                                                   |
| Largest diff. peak and hole               | 1.494 and -0.668 e.Å <sup>-3</sup>                                                                                                                                    |

**Table A2-14.** Selected least-squares planes data of complex [L1Eu(hfac)<sub>3</sub>] $\cdot$ 0.5CH<sub>2</sub>Cl<sub>2</sub> $\cdot$ 1.5C<sub>6</sub>H<sub>14</sub>.

|                                                                              | Abbreviation | RMSD (Å) | Max deviation (Å)<br>(Atom) |
|------------------------------------------------------------------------------|--------------|----------|-----------------------------|
| Benzimidazole (1)<br>N1 C4 N2 C10 C5 C6 C7 C8 C9                             | Bz1          | 0.012    | C6 (0.019)                  |
| Benzimidazole (2)<br>N1 C4 N2 C10 C5 C6 C7 C8 C9                             | Bz1          | 0.012    | C6 (0.019)                  |
| Pyridine<br>N3 C3 C2 C1 C2 C3                                                | Py           | 0.003    | C2, C3 (0.003)              |
| Pyrene<br>C19 C32 C31 C30 C29 C28 C27 C26 C25<br>C24 C23 C34 C33 C20 C21 C22 | Pr           | 0.023    | C27(0.035)                  |
| Hexafluoroacetylacetonate (1)<br>O1 C36 C37 C38 O2                           | Hfac1        | 0.008    | C37 (0.011)                 |
| Hexafluoroacetylacetonate (2)<br>O3 C41 C42 C41 O3                           | Hfac2        | 0.001    | C41, C3 (0.001)             |
| Hexafluoroacetylacetonate (3)<br>O1 C36 C37 C38 O2                           | Hfac1        | 0.008    | C37 (0.011)                 |

**Table A2-15.** Interplanar angles (°) for [L1Eu(hfac)<sub>3</sub>] $\cdot$ 0.5CH<sub>2</sub>Cl<sub>2</sub> $\cdot$ 1.5C<sub>6</sub>H<sub>14</sub>.

| Plane             | Benzimidazole (1) | Benzimidazole (2) | Hfac1     | Hfac2     | Hfac1     |
|-------------------|-------------------|-------------------|-----------|-----------|-----------|
| Pyridine          | 12.92(12)         | 12.92(12)         | 76.11(18) | 29.7(2)   | 76.11(18) |
| Benzimidazole (1) |                   | 23.11(16)         | 80.69(15) | 26.41(11) | 80.69(15) |
| Benzimidazole (2) |                   |                   | 63.86(16) | 26.41(11) | 63.86(16) |
| Hfac1             |                   |                   |           | 57.03(14) | 88.18(16) |
| Hfac2             |                   |                   |           |           | 57.03(14) |

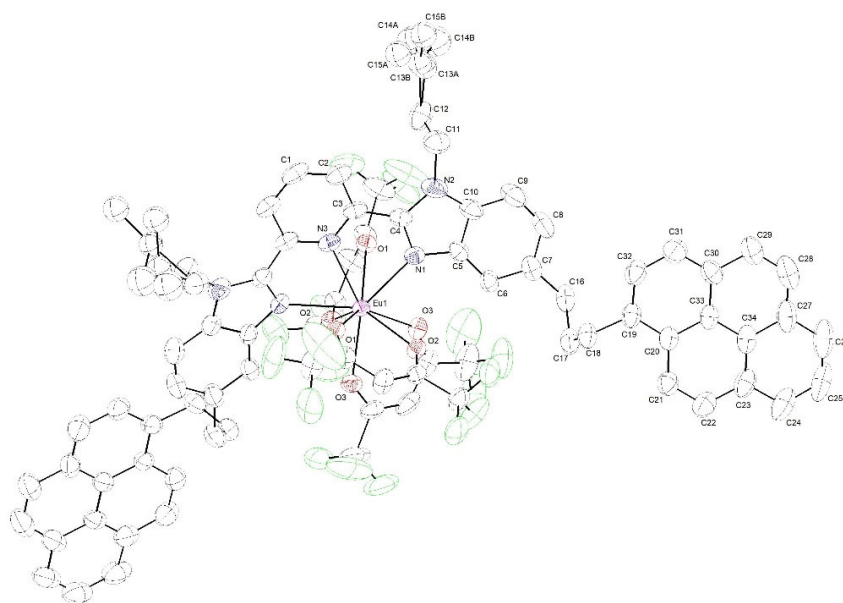

**Figure A2-8.** ORTEP view of  $[L1Eu(hfac)_3]$  (thermal ellipsoids are drawn at 50% probability level) with numbering scheme of the asymmetric unit. Hydrogen atoms and disordered solvent molecules are omitted for clarity purposes.

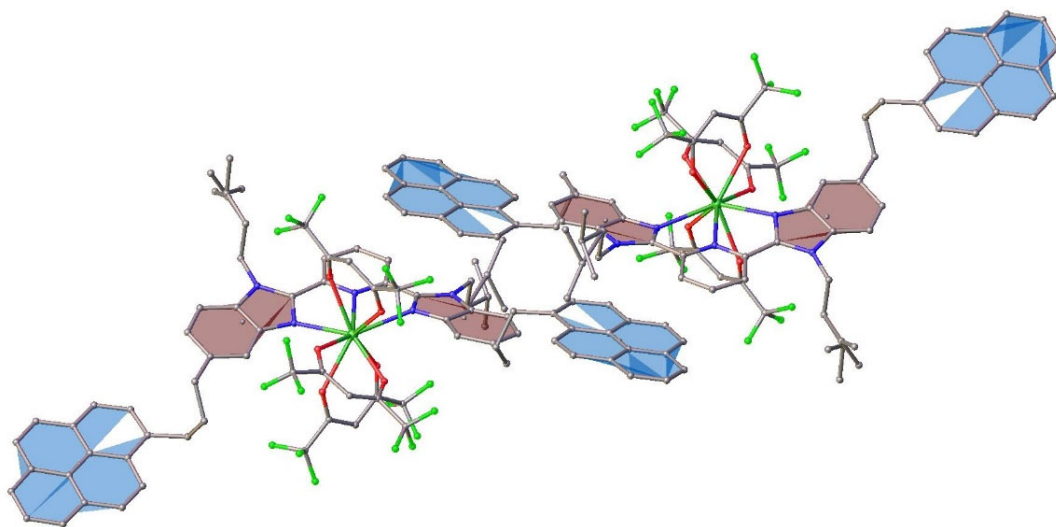

**Figure A2-9.** Planes and  $\pi$ - $\pi$  stacking in  $[L1Eu(hfac)_3]$ . Intermolecular interactions between two symmetry-related molecules. (mol1 down left, mol1' (1-x;1-y;1-z) up right).

Bz(brown) – Pr'(blue):

Angle between planes =  $1.65^\circ$

Distance Bz to Pr' centroid = 3.43 Å

Pr(blue)- Bz'(brown):

Angle between planes =  $1.65^\circ$

Distance Pyr to Bz' centroid = 3.45 Å

**Table A2-16.** Summary of crystal data, intensity measurements and structure refinements for [L1Y(hfac)<sub>3</sub>] $\cdot$ 2.25C<sub>6</sub>H<sub>14</sub>.

|                                           |                                                                                                                                |
|-------------------------------------------|--------------------------------------------------------------------------------------------------------------------------------|
| CCDC number                               | 2531611                                                                                                                        |
| Empirical formula                         | C <sub>82</sub> H <sub>64</sub> N <sub>5</sub> O <sub>6</sub> F <sub>18</sub> Y                                                |
| Chemical formula moiety                   | C <sub>82</sub> H <sub>64</sub> N <sub>5</sub> O <sub>6</sub> F <sub>18</sub> Y $\cdot$ 2.25C <sub>6</sub> H <sub>14</sub>     |
| Formula weight                            | 1840.17                                                                                                                        |
| Temperature                               | 119.99(10) K                                                                                                                   |
| Wavelength                                | 1.54184 Å                                                                                                                      |
| Crystal system                            | Orthorhombic                                                                                                                   |
| Space group                               | <i>Pbcn</i>                                                                                                                    |
| Unit cell dimensions                      | a = 20.11679(14) Å $\alpha = 90^\circ$ .<br>b = 14.05917(8) Å $\beta = 90^\circ$ .<br>c = 30.12016(14) Å $\gamma = 90^\circ$ . |
| Volume                                    | 8518.75(8) Å <sup>3</sup>                                                                                                      |
| Z (Z')                                    | 4 (0.5)                                                                                                                        |
| Density (calculated)                      | 1.435 Mg/m <sup>3</sup>                                                                                                        |
| Absorption coefficient                    | 1.813 mm <sup>-1</sup>                                                                                                         |
| F(000)                                    | 3810                                                                                                                           |
| Crystal size                              | 0.26 x 0.163 x 0.043 mm <sup>3</sup>                                                                                           |
| Theta range for data collection           | 2.934 to 75.964°.                                                                                                              |
| Index ranges                              | -25 $\leq$ h $\leq$ 24, -17 $\leq$ k $\leq$ 17, -22 $\leq$ l $\leq$ 37                                                         |
| Reflections collected                     | 75060                                                                                                                          |
| Independent reflections                   | 8673 [R(int) = 0.0301]                                                                                                         |
| Completeness to theta = 67.684°           | 99.9 %                                                                                                                         |
| Absorption correction                     | Analytical                                                                                                                     |
| Max. and min. transmission                | 0.925 and 0.697                                                                                                                |
| Refinement method                         | Full-matrix least-squares on F <sup>2</sup>                                                                                    |
| Data / restraints / parameters            | 8673 / 0 / 509                                                                                                                 |
| Goodness-of-fit on F <sup>2</sup>         | 1.084                                                                                                                          |
| Final R indices [I $\geq$ 2 $\sigma$ (I)] | R1 = 0.0602, wR2 = 0.1795                                                                                                      |
| R indices (all data)                      | R1 = 0.0668, wR2 = 0.1850                                                                                                      |
| Extinction coefficient                    | n/a                                                                                                                            |
| Largest diff. peak and hole               | 1.426 and -0.737 e.Å <sup>-3</sup>                                                                                             |

**Table A2-17.** Selected least-squares planes data of complex [L1Y(hfac)<sub>3</sub>] $\cdot$ 2.25C<sub>6</sub>H<sub>14</sub>.

|                                                                              | Abbreviation | RMSD (Å) | Max deviation (Å)<br>(Atom) |
|------------------------------------------------------------------------------|--------------|----------|-----------------------------|
| Benzimidazole (1)<br>N1 C4 N2 C10 C5 C6 C7 C8 C9                             | Bz1          | 0.013    | C6 (0.019)                  |
| Benzimidazole (2)<br>N1 C4 N2 C10 C5 C6 C7 C8 C9                             | Bz1          | 0.013    | C6 (0.019)                  |
| Pyridine<br>N3 C3 C2 C1 C2 C3                                                | Py           | 0.003    | C3 (0.004)                  |
| Pyrene<br>C19 C30 C31 C32 C33 C34 C27 C26 C25<br>C24 C23 C28 C29 C20 C21 C22 | Pr           | 0.024    | C24(0.039)                  |
| Hexafluoroacetylacetonate (1)<br>O1 C36 C37 C38 O2                           | Hfac1        | 0.009    | C37 (0.013)                 |
| Hexafluoroacetylacetonate (2)<br>O3 C41 C42 C41 O3                           | Hfac2        | 0.008    | C41 (0.009)                 |
| Hexafluoroacetylacetonate (3)<br>O1 C36 C37 C38 O2                           | Hfac1        | 0.009    | C37 (0.013)                 |

**Table A2-18.** Interplanar angles (°) for [L1Y(hfac)<sub>3</sub>] $\cdot$ 2.25C<sub>6</sub>H<sub>14</sub>.

| Plane             | Benzimidazole (1) | Benzimidazole (2) | Hfac1     | Hfac2     | Hfac1     |
|-------------------|-------------------|-------------------|-----------|-----------|-----------|
| Pyridine          | 12.12(8)          | 12.12(8)          | 75.61(13) | 31.18(14) | 75.61(13) |
| Benzimidazole (1) |                   | 21.61(11)         | 79.76(11) | 27.69(9)  | 79.76(11) |
| Benzimidazole (2) |                   |                   | 64.11(12) | 27.69(9)  | 64.11(12) |
| Hfac1             |                   |                   |           | 55.64(10) | 87.34(12) |
| Hfac2             |                   |                   |           |           | 55.64(10) |

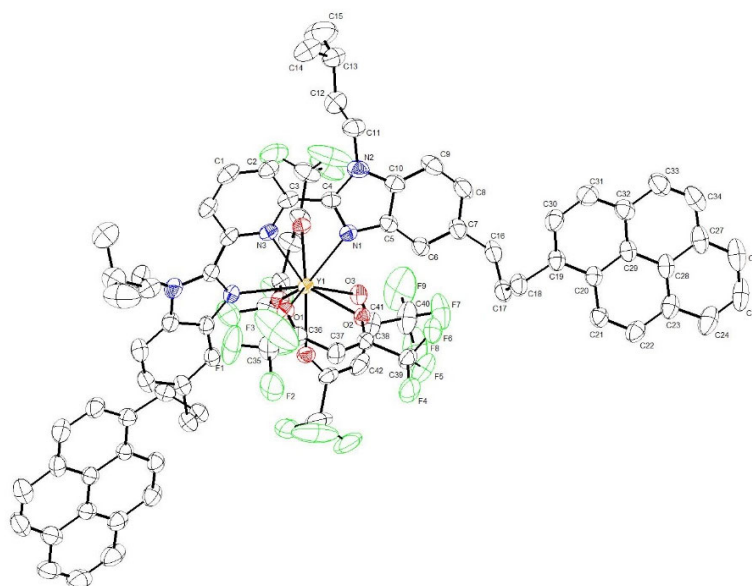

**Figure A2-10.** Ortep view of  $[L1Y(hfac)_3]$  with numbering scheme of the asymmetric unit (thermal ellipsoids are drawn at 50% probability level). Hydrogen atoms are omitted for clarity purposes.

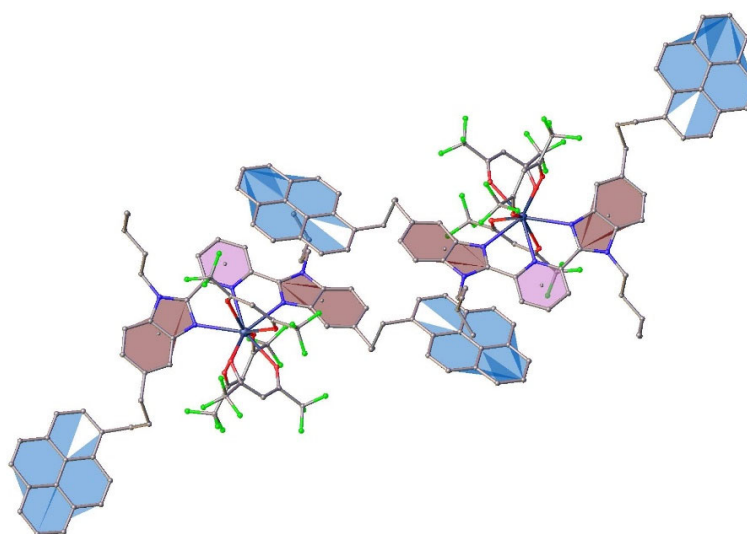

**Figure A2-11.**  $\pi$ - $\pi$  Stacking in  $[L1Y(hfac)_3]$ . Intermolecular interaction between two symmetry-related molecules. (moll down left, moll' (1-x; 1-y; 1-z) up right). Pyridine (Py=pink), Bz (brown), pyrene (Pyr=blue).

**Bz(brown) – Pr'(blue):**

Angle between planes =  $3.09^\circ$   
Distance Bz to Pyr' centroid = 3.40 Å

**Pr(blue)- Bz'(brown):**

Angle between planes =  $3.09^\circ$   
Distance Pyr to Bz' centroid = 3.47 Å

**Py(pink) – Pr'(blue):**

Angle between planes =  $15.03^\circ$   
Distance Py to Pyr' centroid = 3.01 Å

**Pr(blue) – Py'(pink):**

Angle between planes =  $15.03^\circ$   
Distance Pyr to Py' centroid = 3.55 Å

**Appendix 3: The aggregation equilibrium constant  $K_{\text{Dimer}}$  of **1**, **L1** and  $[\text{L1Y}(\text{hfac})_3]$  in dichloromethane solution.**

**Table A3-1.** The aggregation equilibrium constant  $K_{\text{Dimer}}$  and the chemical shift  $\delta_{\text{D}}$  of pure dimer obtained from the titrations of **1**, **L1**, and  $[\text{L1Y}(\text{hfac})_3]$  at various concentrations.

|                                    | <b>1</b> | <b>L1</b> | $[\text{L1Y}(\text{hfac})_3]$ |
|------------------------------------|----------|-----------|-------------------------------|
| $K_{\text{Dimer}} / \text{M}^{-1}$ | 3.6      | 3.0       | 17.4                          |
| $\delta_{\text{D}} / \text{ppm}$   | 8.3260   | 7.9735    | 7.9920                        |

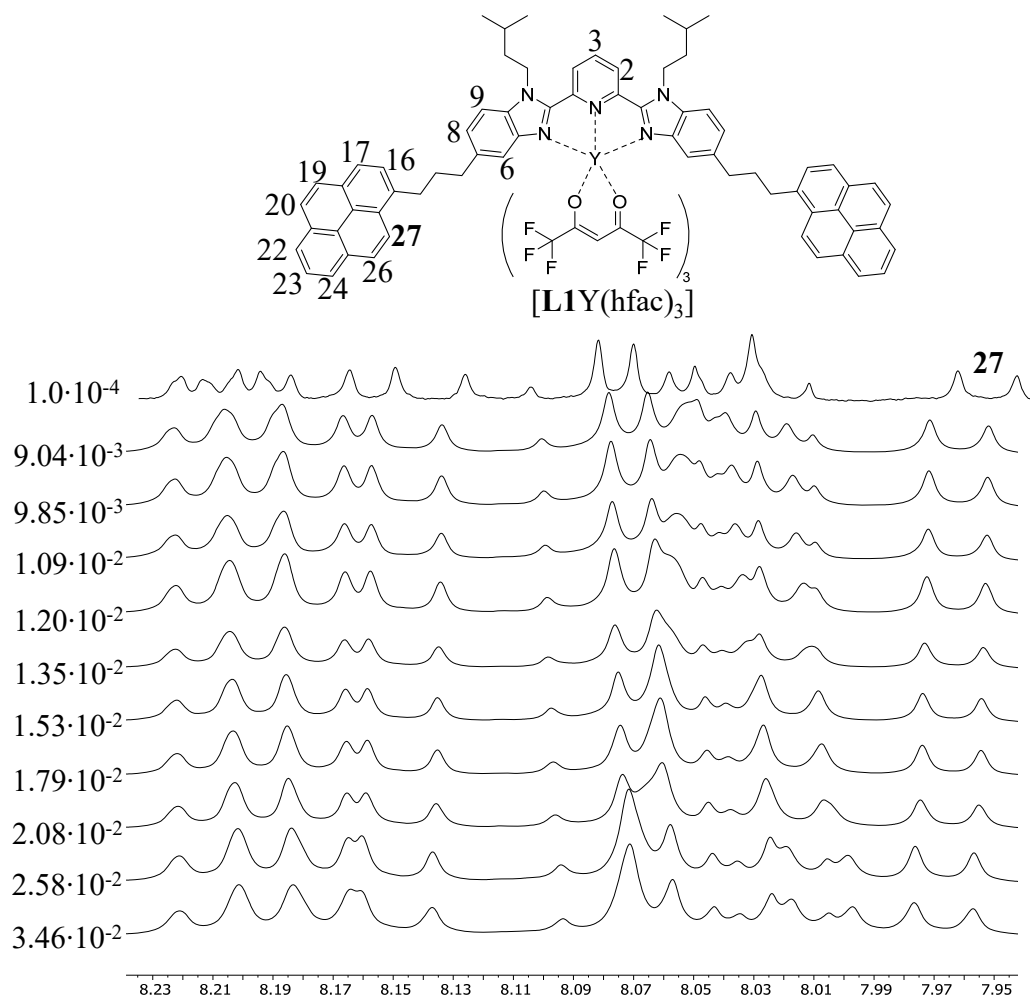

**Figure A3-1.**  $^1\text{H}$  NMR spectrum of  $[\text{L1Y}(\text{hfac})_3]$  in  $\text{CD}_2\text{Cl}_2$  upon increasing concentration for determining dimerization constant.

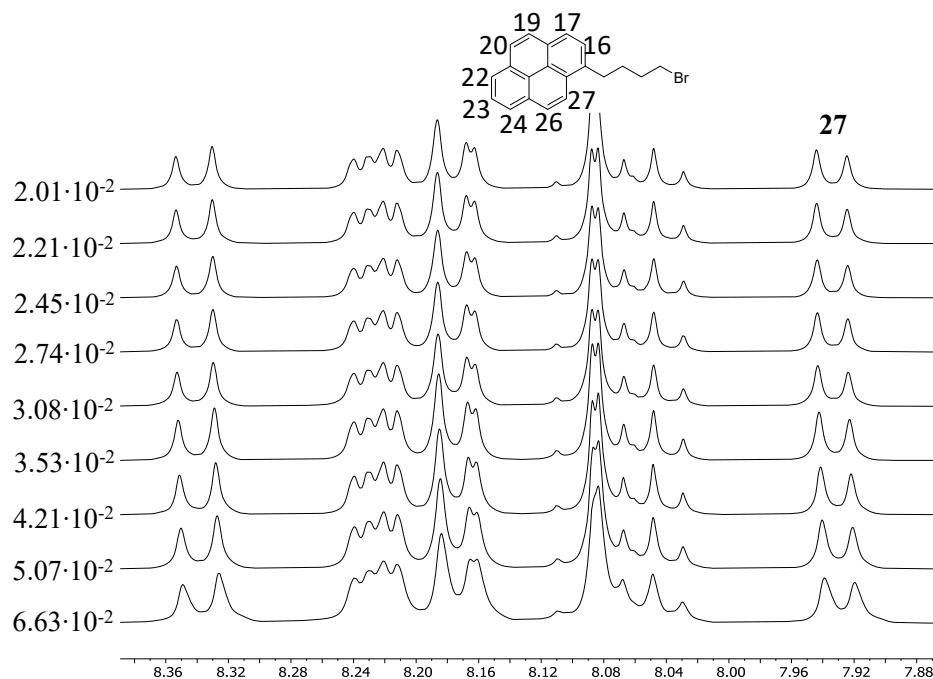

**Figure A3-2.**  $^1\text{H}$  NMR spectrum of **1** in  $\text{CD}_2\text{Cl}_2$  upon increasing concentration for determining dimerization constant.

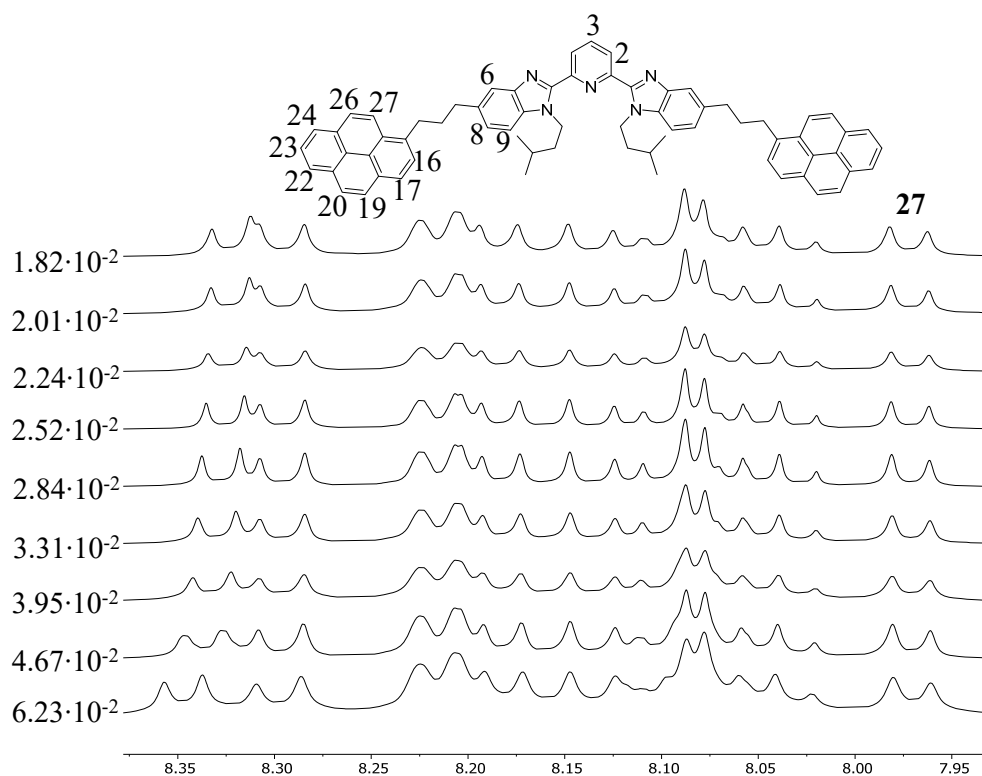

**Figure A3-3.**  $^1\text{H}$  NMR spectrum of **L1** in  $\text{CD}_2\text{Cl}_2$  upon increasing concentration for determining dimerization constant.

**Appendix 4:  $^1\text{H}$  NMR titration of  $[\text{L1Y}(\text{hfac})_3]$  host and aromatic compound guest**

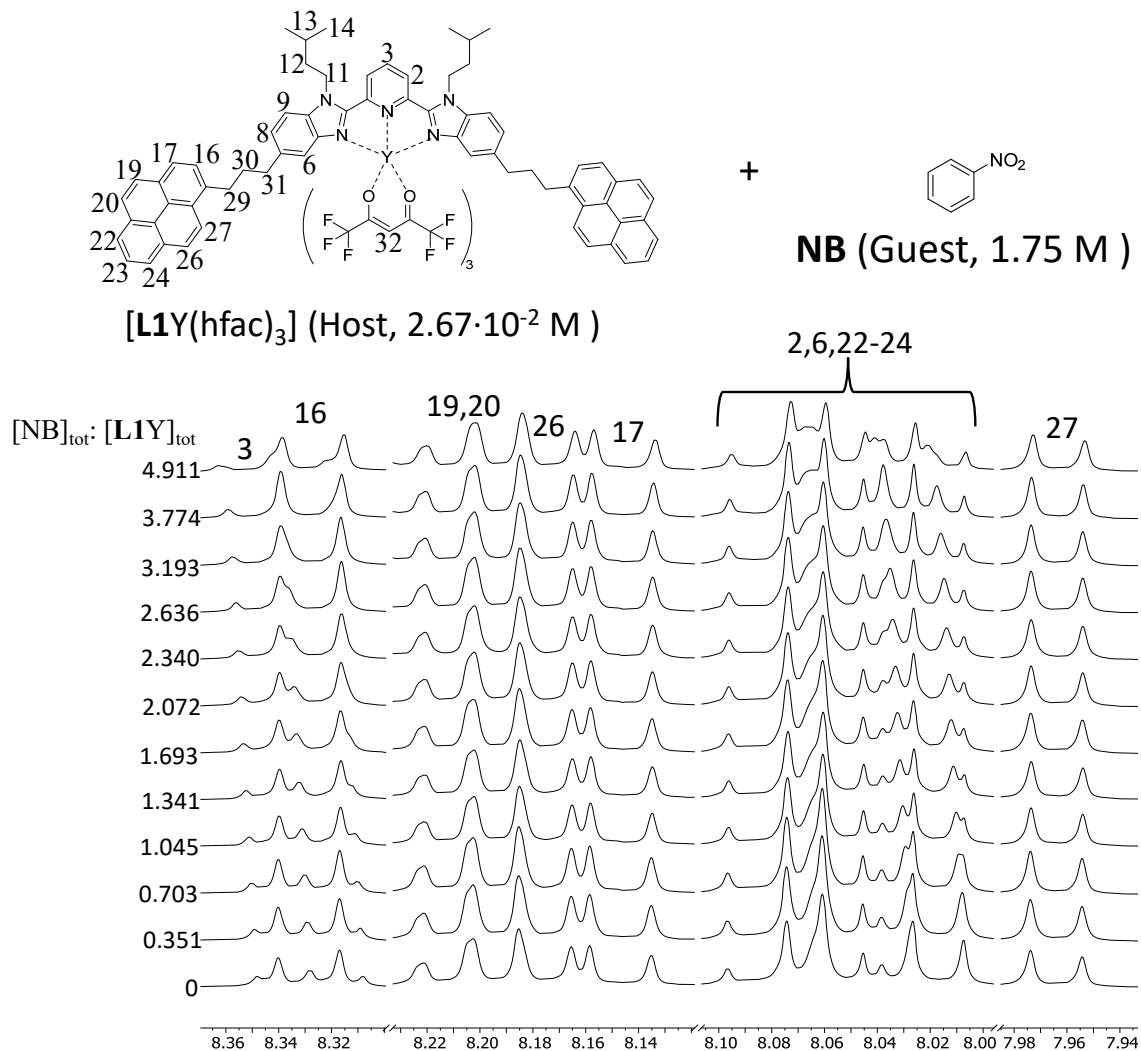

**Figure A4-1.**  $^1\text{H}$  NMR titration of  $[\text{L1Y}(\text{hfac})_3]$  with NB at 298K in  $\text{CD}_2\text{Cl}_2$

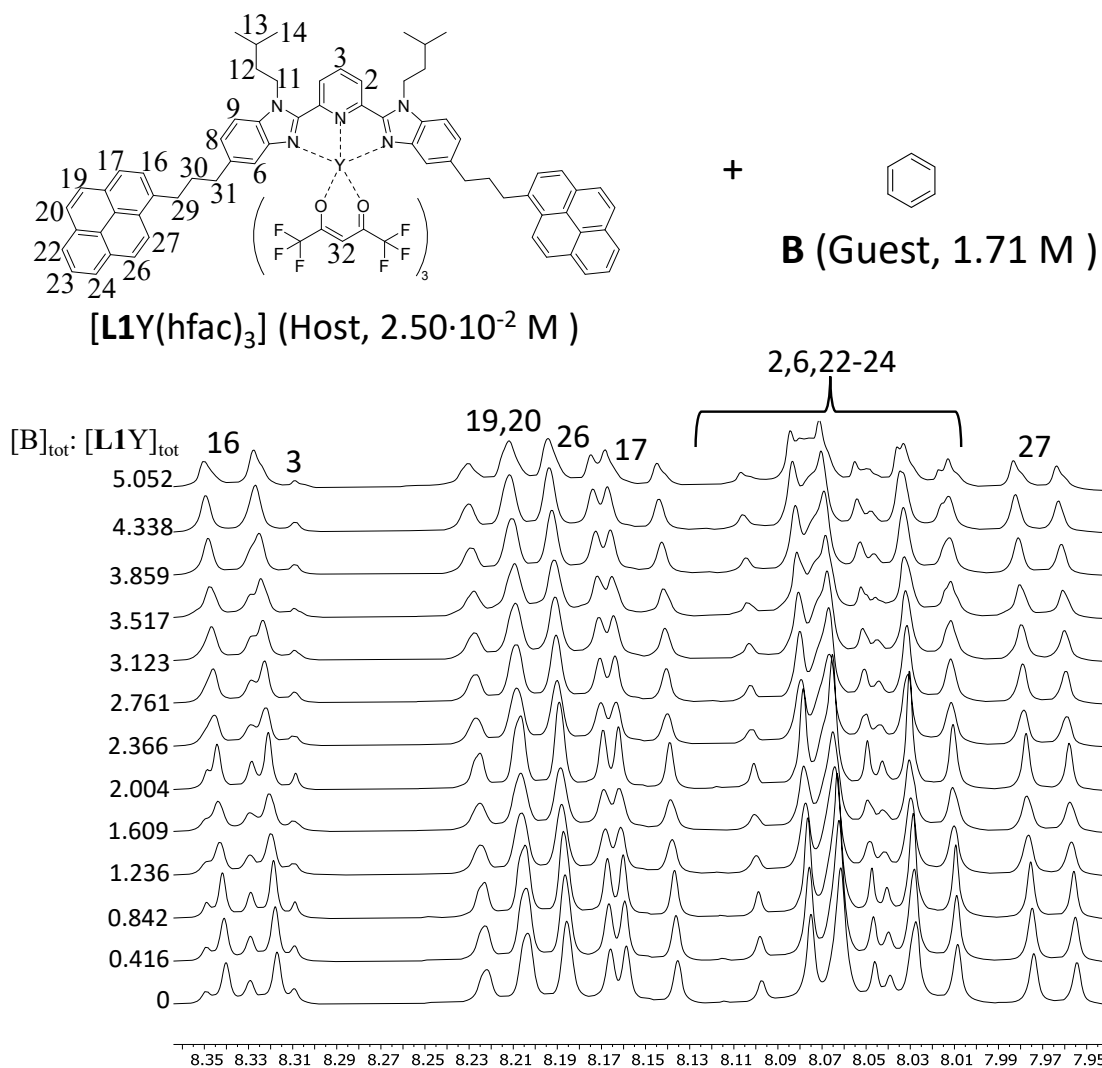

**Figure A4-2.**  $^1H$  NMR titration of  $[L1Y(hfac)_3]$  with B at 298K in  $CD_2Cl_2$

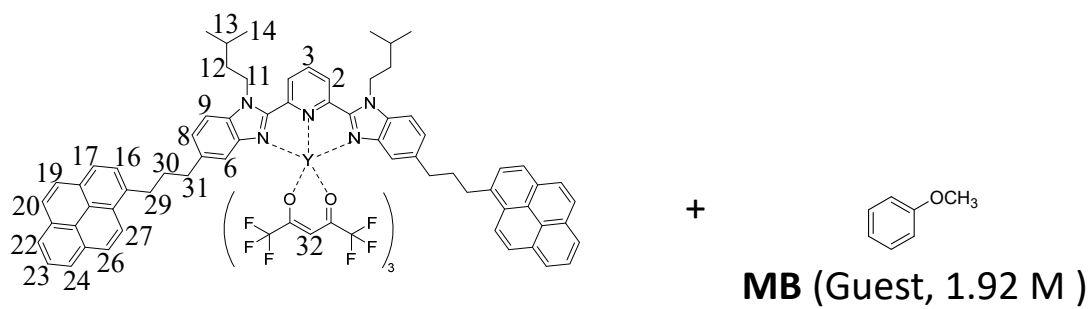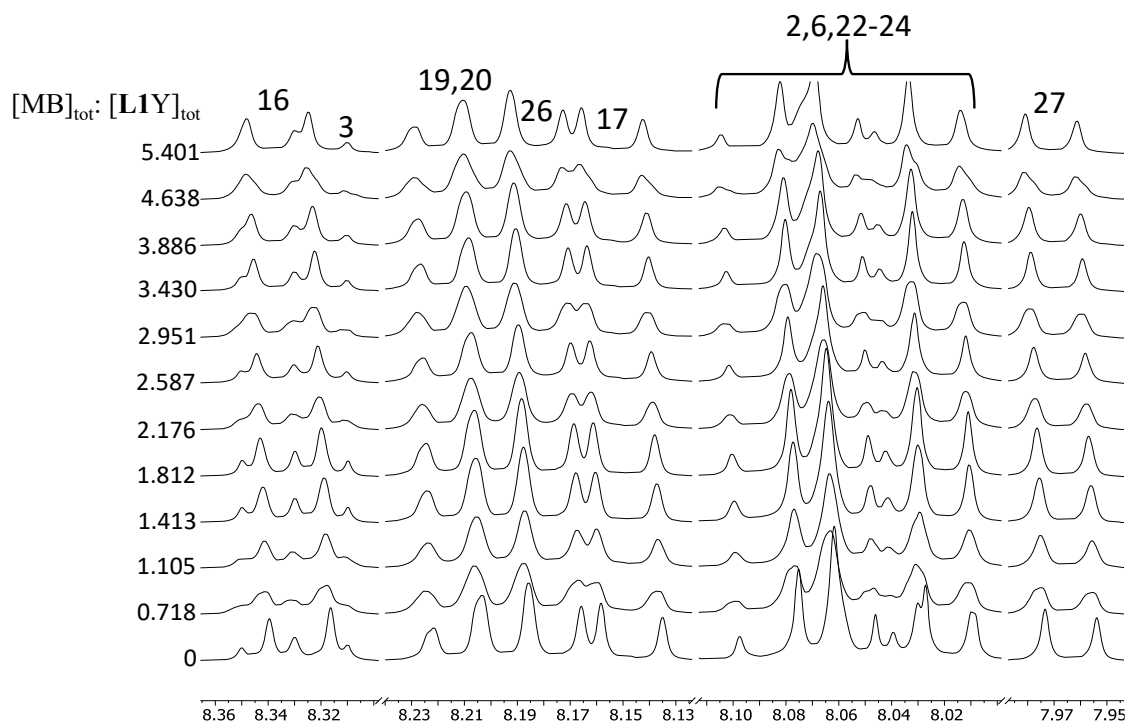

**Figure A4-3.** <sup>1</sup>H NMR titration of [L1Y(hfac)<sub>3</sub>] with MB at 298K in CD<sub>2</sub>Cl<sub>2</sub>

## Appendix 5: Thermodynamic properties of L1 receptor with [Y(hfac)<sub>3</sub>] guest in dichloromethane.

The binding isotherm rebuilt from obtained stability constant  $\beta_{1,1,\text{cond}}^{\text{L1,Y}}$  (dashed-red traces in Figure 7 in the main text) differs from the experimental curve (black diamonds in Figure 7 in the main text) due to the variation in the activity coefficients  $\gamma_i$  occurring in non-ideal organic solutions according to eq (A5-1),<sup>A5-1</sup> where  $c^\theta = 1 \text{ M}$  stands for the concentration of the reference state.

$$\begin{aligned}\beta_{1,1,\text{cond}}^{\text{L1,Y}} &= \frac{a_{\text{L1Y}}^{\text{eq}}}{a_{\text{Y}}^{\text{eq}} a_{\text{L1}}^{\text{eq}}} = \frac{\gamma_{\text{L1Y}}}{\gamma_{\text{Y}} \gamma_{\text{L1}}} \cdot \frac{(c_{\text{L1Y}}^{\text{eq}}/c^\theta)}{(c_{\text{Y}}^{\text{eq}}/c^\theta)(c_{\text{L1}}^{\text{eq}}/c^\theta)} = \frac{\gamma_{\text{L1Y}}}{\gamma_{\text{Y}} \gamma_{\text{L1}}} \cdot \left( \frac{|\text{L1Y}|}{|\text{Y}||\text{L1}|} \right) \cdot c^\theta \\ &= \frac{\gamma_{\text{L1Y}}}{\gamma_{\text{Y}} \cdot \gamma_{\text{L1}}} \cdot Q_{1,1,\text{cond}}^{\text{L1,Y}} \cdot c^\theta\end{aligned}\quad (\text{A5-1})$$

Eggers and coworkers proposed eq (A5-2) to catch these variations during the host-guest interactions,<sup>A5-2,A5-3</sup> where the experimental quotients of reaction  $Q_{1,1,\text{cond}}^{\text{L1,Y}} = \left( \frac{|\text{L1Y}|}{|\text{Y}||\text{L1}|} \right)$  can be easily estimated at each point of <sup>1</sup>H RMN titration.

$$-RT \ln(Q_{1,1,\text{cond}}^{\text{L1,Y}}) = -RT \ln(\beta_{1,1,\text{cond}}^{\text{L1,Y},\infty}) + \Delta G_{1,1,\text{cond}}^{\text{L1,Y,S}} \cdot (|\text{L1Y}|/c^\theta) \quad (\text{A5-2})$$

The plots of  $-RT \ln(Q_{1,1,\text{cond}}^{\text{L1,Y}})$  versus the concentration of formed final complex  $|\text{L1Y}|$  are close to linear (Fig. A5-1) and provide free energy changes at infinite dilution  $\Delta G_{1,1,\text{cond}}^{\text{L1,Y},\infty} = -RT \ln(\beta_{1,1,\text{cond}}^{\text{L1,Y},\infty})$  and solvation free energy changes  $\Delta G_{1,1,\text{cond}}^{\text{L1,Y,S}}$  (Table A5-1), from which satisfying occupancy factors  $\theta_{\text{Lk}}^{\text{Eu}}$  could be rebuilt with eq (A5-3) (green dashed trace in Figure 7 in the main text).

$$\begin{aligned}\theta_{\text{L1}}^{\text{Y}} &= \frac{Q_{1,1,\text{cond}}^{\text{Y,L1}} |\text{Y}|}{1 + Q_{1,1,\text{cond}}^{\text{Y,L1}} |\text{Y}|} = \frac{|\text{L1Y}|}{|\text{L1}|_{\text{tot}}} = \frac{|\text{Y}|_{\text{tot}} - |\text{Y}|}{|\text{L1}|_{\text{tot}}} \\ &= \frac{\exp\left[-\left(\Delta G_{1,1,\text{cond}}^{\text{Y,L1},\infty} + (|\text{Y}|_{\text{tot}} - |\text{Y}|) \cdot \Delta G_{1,1,\text{cond}}^{\text{Y,L1,S}}\right)/RT\right] \cdot |\text{Y}|}{1 + \left\{ \exp\left[-\left(\Delta G_{1,1,\text{cond}}^{\text{Y,L1},\infty} + (|\text{Y}|_{\text{tot}} - |\text{Y}|) \cdot \Delta G_{1,1,\text{cond}}^{\text{Y,L1,S}}\right)/RT\right] \cdot |\text{Y}| \right\}}\end{aligned}\quad (\text{A5-3})$$

**Table A5-1.** Associated free energies  $\Delta G_{1,1,\text{cond}}^{\text{L1,Y}} = -RT \ln(\beta_{1,1,\text{cond}}^{\text{L1,Y}})$ ,  $\Delta G_{1,1,\text{cond}}^{\text{L1,Y},\infty}$  and  $\Delta G_{1,1,\text{cond}}^{\text{L1,Y,S}}$  determined for the titration of ligand **L1** with [**digY**(hfac)<sub>3</sub>] in CD<sub>2</sub>Cl<sub>2</sub> + 0.14 M diglyme at 293 K.

|                                                                                   |                     |
|-----------------------------------------------------------------------------------|---------------------|
| $\Delta G_{1,1,\text{cond}}^{\text{L1,Y}} / \text{kJ}\cdot\text{mol}^{-1}$        | -18.7(4)            |
| $\Delta G_{1,1,\text{cond}}^{\text{L1,Y},\infty} / \text{kJ}\cdot\text{mol}^{-1}$ | -15.2(4)            |
| $\Delta G_{1,1,\text{cond}}^{\text{L1,Y,S}} / \text{kJ}\cdot\text{mol}^{-1}$      | $-3.4(3)\cdot 10^3$ |

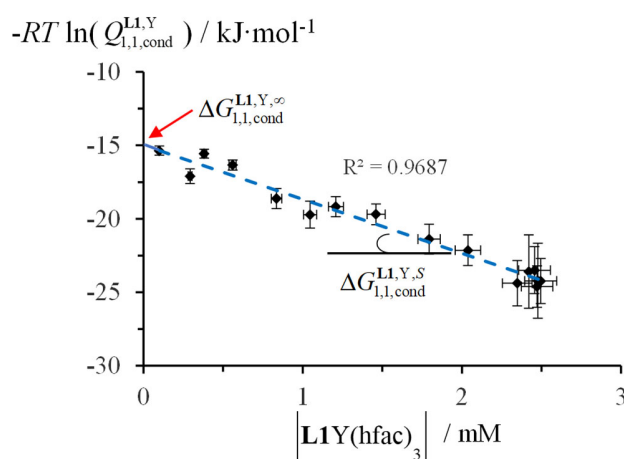

**Figure A5-1** Plots of  $-RT \ln(Q_{1,1,\text{cond}}^{\text{L1,Y}})$  as a function of  $[\text{L1Y}]$  for the titration of **L1** with [**digY**(hfac)<sub>3</sub>] in CD<sub>2</sub>Cl<sub>2</sub> + 0.14 M diglyme at 293K.

## References

- (A5-1) Baudet, K.; Kale, V.; Mirzakhani, M.; Babel, L.; Naseri, S.; Besnard, C.; Nozary, H.; Piguet, C. Neutral Heteroleptic Lanthanide Complexes for Unravelling Host-Guest Assemblies in Organic Solvents: The Law of Mass Action Revisited. *Inorg. Chem.* **2020**, *59*, 62-75. DOI: 10.1021/acs.inorgchem.9b00755.
- (A5-2) Castellano, B. M.; Eggers, D. K. Experimental Support for a Desolvation Energy Term in Governing Equations for Binding Equilibria. *J. Phys. Chem. B* **2013**, *117*, 8180-8188. DOI: 10.1021/jp402632a.
- (A5-3) Eggers, D. K.; Le, J. M.; Nahm, N. T.; Pham, D. N.; Castellano, B. M. Dual Effect of Secondary Solutes on Binding Equilibria: Contributions from Solute-Reactant Interactions and Solute-Water Interactions. *ACS Omega* **2024**, *48*, 928-934. DOI: 10.1021/acsomega.3c09329.

## Appendix 6: Photophysical parameters of *Lk* ligands and their lanthanide complexes

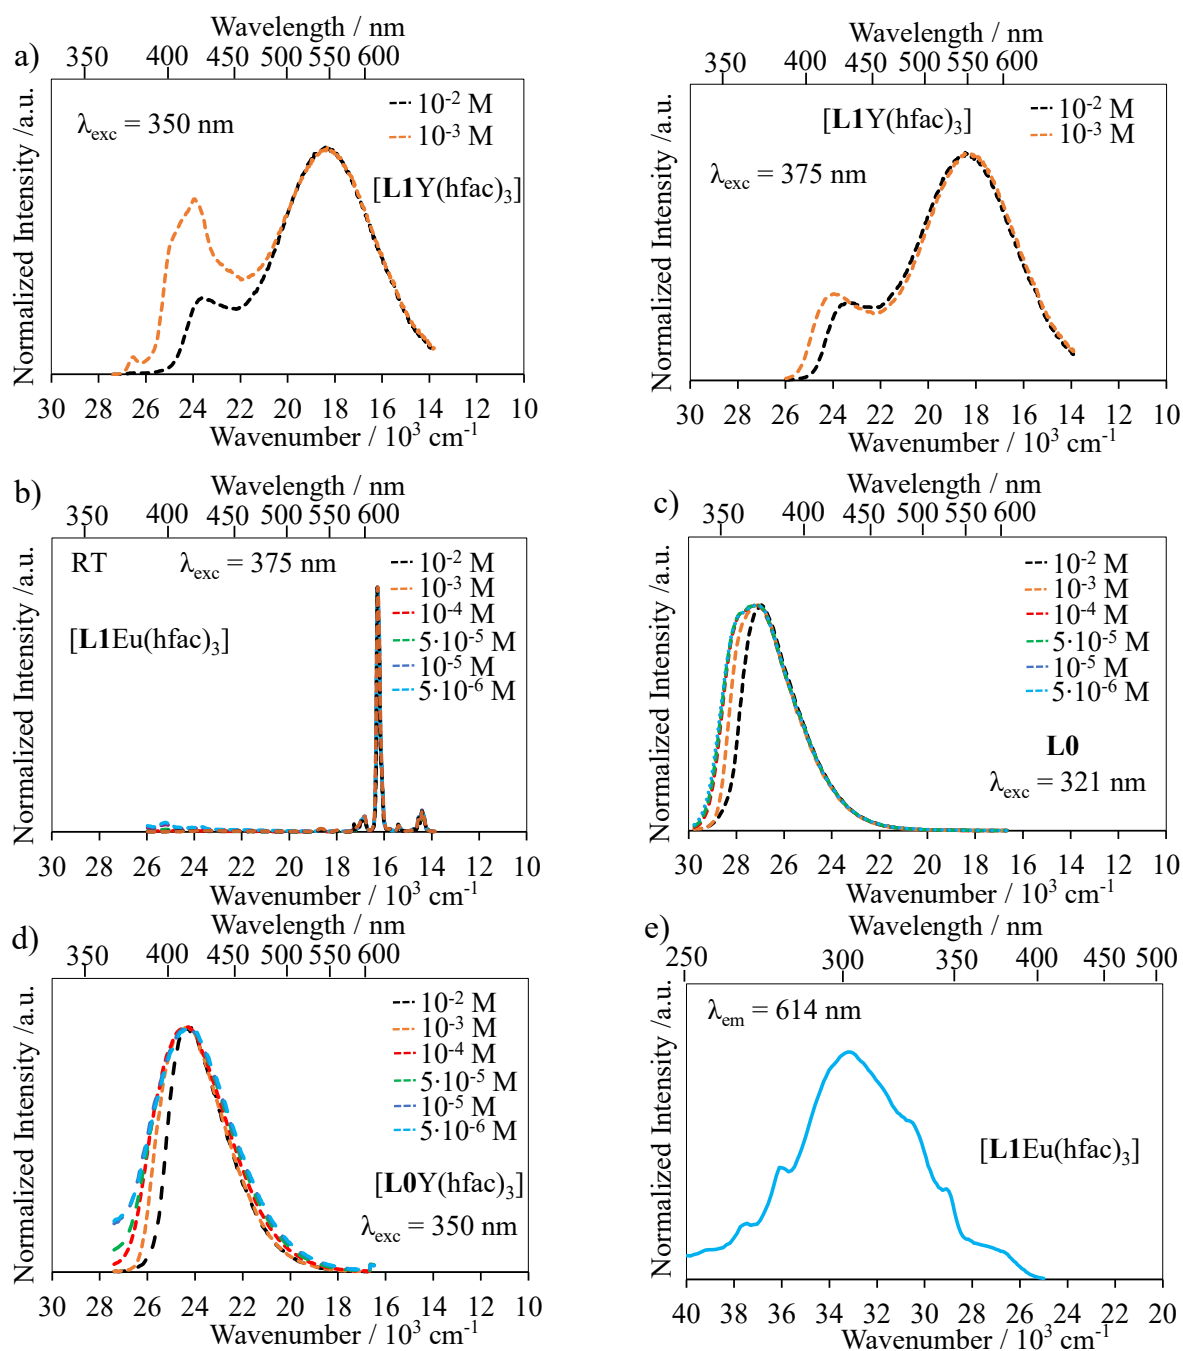

**Figure A6-1.** Normalized emission spectra recorded for a) [L1Y(hfac)<sub>3</sub>] at  $\lambda_{\text{exc}} = 350$  nm (left) and  $\lambda_{\text{exc}} = 375$  nm (right), b) [L1Eu(hfac)<sub>3</sub>] at  $\lambda_{\text{exc}} = 350$  nm, c) L0 at  $\lambda_{\text{exc}} = 321$  nm, d) [L0Y(hfac)<sub>3</sub>] at  $\lambda_{\text{exc}} = 350$  nm, and e) excitation spectrum of [L1Eu(hfac)<sub>3</sub>] at  $\lambda_{\text{em}} = 614$  nm (dichloromethane, 293 K).

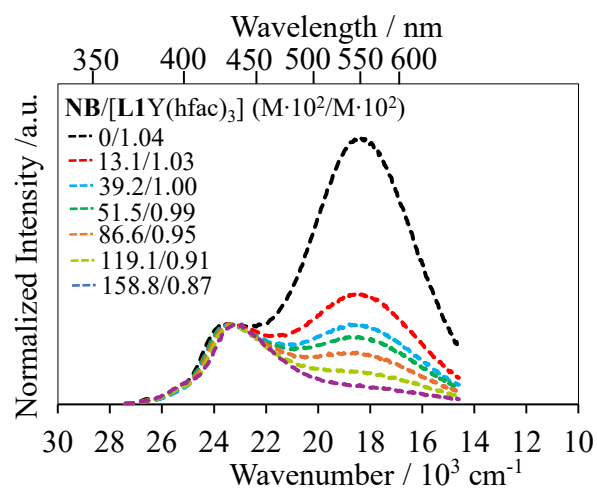

**Figure A6-2.** Fluorescence titration of [L1Y(hfac)<sub>3</sub>] at 10<sup>-2</sup> M with NB ( $\lambda_{\text{exc}} = 350 \text{ nm}$ )
